# Supplementary material for: Synthesis and biological evaluation of substituted N-alkylphenyl-3,5-dinitrobenzamide analogs as anti-TB agents
Source: Royal Society of Chemistry journal article supplement (doi:10.1039/c3md00366c), 2014-01-01
Supplement: c3md00366c1.pdf [file c3md00366c1.pdf]

**Synthesis and Biological Evaluation of Substituted N-alkylphenyl-3,5-dinitrobenzamide  
Analogues as Anti-TB Agents**

Gurunadham Munagala,<sup>1,2</sup> Kushalava Reddy Yempalla,<sup>1,2</sup> Sravan Kumar Aithagani,<sup>1,2</sup> Nitin  
Pal Kalia,<sup>3</sup> Furqan Ali,<sup>3</sup> Intzar Ali,<sup>3</sup> Vikrant Singh Rajput,<sup>1,3</sup> Chitra Rani,<sup>1,3</sup> Reena Chib,<sup>3</sup>  
Rukmankesh Mehra,<sup>4</sup> Amit Nargotra,<sup>4</sup> Inshad Ali Khan,<sup>1,3,\*</sup> Ram A. Vishwakarma<sup>1,2,\*</sup> and  
Parvinder Pal Singh<sup>1,2,\*</sup>

<sup>1</sup>*Academy of Scientific and Innovative Research*

<sup>2</sup>*Medicinal Chemistry Division,*

<sup>3</sup>*Clinical Microbiology,*

<sup>4</sup>*Discovery Informatics,*

*CSIR-Indian Institute of Integrative Medicine, Jammu 180 001, India*

*Tel.: +91-191-2569111, Fax: +91-191-2569333, E-mail: [ppsingh@iiim.res.in](mailto:ppsingh@iiim.res.in).*

*[ram@iiim.res.in](mailto:ram@iiim.res.in) and [iakhan@iiim.res.in](mailto:iakhan@iiim.res.in)*

IIIM Communication No. IIIM/1578/2013

## Table of Contents

| <b>S.No</b>   | <b>Contents</b>                                        | <b>Page Nos</b> |
|---------------|--------------------------------------------------------|-----------------|
| <b>Part A</b> | <b>Chemistry : Experimental Section</b>                | <b>3-21</b>     |
| <b>Part B</b> | <b>Pharmacokinetics studies of compounds 7a and 7d</b> | <b>22-27</b>    |
| <b>Part C</b> | <b>Spectra of synthesized DNB analogs</b>              | <b>28-146</b>   |
|               | <b>Chiral HPLC spectra of 4b, 7a and 7b</b>            | <b>147-148</b>  |

## Part A: Chemistry

### Experimental Section: General

All chemicals for this study were purchased from Sigma-Aldrich, USA.  $^1\text{H}$ NMR recorded on 400 MHz or 500 MHz. Chemical data for protons are reported in parts per million (ppm, scale) downfield from tetramethylsilane and are referenced to the residual proton in the NMR solvent ( $\text{CDCl}_3$ :  $\delta$  7.26,  $\text{DMSO-d}_6$ :  $\delta$  2.5 or other solvents as mentioned). All the NMR spectra were processed in either MestReNova or Bruker software. Mass spectras were recorded with HRMS instrument. Chiral HPLC was performed on Agilent Technologies 1260 infinity series system using Astec CHIROBIOTIC T column with dimension 4.6 x 250 mm, particle size 5 $\mu\text{m}$ . Mobile phase used was (A) buffer having 10 mM ammonium acetate pH 4.0 adjusted with glacial acetic acid and (B) Acetonitrile. The experiment run on a gradient program as 0% B till 5 min then goes to 40 %B in 30 min, remain at 40%B for 5 min then return to 0 % B in 5 min and retained there for 5 min with a flow rate of 1 ml/min. UV recorded at 254 nm. Enantiomeric excess was calculated through area integration of enantiomers.

#### 1. 4-methyl-3, 5-dinitro-N-(1-(*p*-tolyl)ethyl)benzamide (4b):

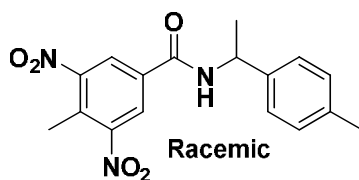

TLC (EtOAc/hexane, 2:8):  $R_f$  = 0.25; Light yellow solid; mp 124-125  $^{\circ}\text{C}$ ;  $^1\text{H}$  NMR (400 MHz,  $\text{CDCl}_3$ )  $\delta$  8.36 (s, 2H), 7.26 (t,  $J$  = 4.0 Hz, 3H), 7.17 (d,  $J$  = 7.9 Hz, 2H), 6.53 (d,  $J$  = 6.8 Hz, 1H), 5.27 (p,  $J$  = 7.0 Hz, 1H), 2.60 (s, 3H), 2.34 (s, 3H), 1.62 (d,  $J$  = 6.9 Hz, 3H);  $^{13}\text{C}$  NMR (101 MHz, Acetone- $\text{d}_6$ )  $\delta$  162.59, 152.40, 141.72, 137.31, 135.68, 130.07, 129.81,

127.10, 126.98, 50.29, 50.18, 22.14, 20.99, 15.02; HRMS (ESI-TOF) calcd for C<sub>17</sub>H<sub>17</sub>N<sub>3</sub>O<sub>5</sub> [M - H]<sup>-</sup> 342.1089, found 342.1089.

(4b was a racemic mixture and it consists of *R*-isomer- 37.9%, *S*-isomer- 62.1%)

**2. (*R*)-4-methyl-3, 5-dinitro-N-(1-(*p*-tolyl)ethyl)benzamide (7a):**

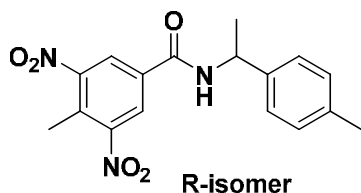

TLC (EtOAc:hexane 2:8): R<sub>f</sub> = 0.25; Light yellow solid; mp 159-160 °C; <sup>1</sup>H NMR (400 MHz, CDCl<sub>3</sub>) δ 8.36 (s, 2H), 7.26 (t, *J* = 4.0 Hz, 3H), 7.17 (d, *J* = 7.9 Hz, 2H), 6.53 (d, *J* = 6.8 Hz, 1H), 5.27 (p, *J* = 7.0 Hz, 1H), 2.60 (s, 3H), 2.34 (s, 3H), 1.62 (d, *J* = 6.9 Hz, 3H); <sup>13</sup>C NMR (101 MHz, Acetone-d<sub>6</sub>) δ 162.59, 152.40, 141.72, 137.31, 135.68, 130.07, 129.81, 127.10, 126.98, 50.29, 50.18, 22.14, 20.99, 15.02; [α]<sub>D</sub> -52.7° (*c* 0.69, Acetone), ee = 100%; HRMS (ESI-TOF) calcd for C<sub>17</sub>H<sub>17</sub>N<sub>3</sub>O<sub>5</sub> [M - H]<sup>-</sup> 342.1089, found 342.1095.

**3. (*S*) - 4-methyl-3,5-dinitro-N-(1-(*p*-tolyl)ethyl)benzamide (7b):**

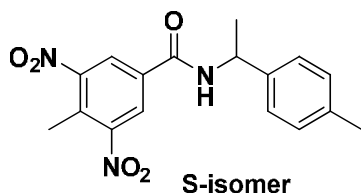

TLC (EtOAc:hexane 2:8): R<sub>f</sub> = 0.25; Light yellow solid; mp 160-161 °C; <sup>1</sup>H NMR (400 MHz, CDCl<sub>3</sub>) δ 8.36 (s, 2H), 7.26 (t, *J* = 4.0 Hz, 3H), 7.17 (d, *J* = 7.9 Hz, 2H), 6.53 (d, *J* = 6.8 Hz, 1H), 5.27 (p, *J* = 7.0 Hz, 1H), 2.60 (s, 3H), 2.34 (s, 3H), 1.62 (d, *J* = 6.9 Hz, 3H); <sup>13</sup>C NMR (101 MHz, Acetone-d<sub>6</sub>) δ 162.59, 152.40, 141.72, 137.31, 135.68, 130.07, 129.81, 127.10, 126.98, 50.29, 50.18, 22.14, 20.99, 15.02; [α]<sub>D</sub> +56.9° (*c* 0.51, Acetone), ee = 100%; HRMS (ESI-TOF) calcd for C<sub>17</sub>H<sub>17</sub>N<sub>3</sub>O<sub>5</sub> [M - H]<sup>-</sup> 342.1089, found 342.1089.

**4. (*R*)-N-(1-(4-Fluorophenyl)ethyl)-4-methyl-3, 5-dinitrobenzamide (7c):**

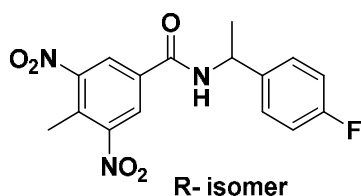

TLC (EtOAc:hexane 2:8):  $R_f = 0.30$ ; Light yellow solid; mp 191-192 °C;  $^1\text{H}$  NMR (400 MHz,  $\text{CDCl}_3$ )  $\delta$  8.36 (s, 2H), 7.34 (dd,  $J = 8.6, 5.4$  Hz, 2H), 7.04 (t,  $J = 8.7$  Hz, 2H), 6.61 (d,  $J = 6.1$  Hz, 1H), 5.28 (p,  $J = 7.1$  Hz, 1H), 2.60 (s, 3H), 1.62 (d,  $J = 6.9$  Hz, 3H).  $^{13}\text{C}$  NMR (126 MHz, Acetone- $d_6$ )  $\delta$  162.69 (d,  $J = 243.08$  Hz), 162.58, 152.41, 140.99 (d,  $J = 2.99$  Hz), 135.49, 130.31, 129.13 (d,  $J = 8.09$  Hz), 127.09, 115.84 (d,  $J = 21.47$  Hz), 50.00, 22.27, 15.17;  $[\alpha]_D -52.0^\circ$  ( $c$  0.6, Acetone), ee = 100%; HRMS (ESI-TOF) calcd for  $\text{C}_{17}\text{H}_{17}\text{N}_3\text{O}_5$   $[\text{M} - \text{H}]^-$  346.0839, found 346.0856.

**5. (S)-N-(1-(4-Fluorophenyl)ethyl)-4-methyl-3, 5-dinitrobenzamide (7d):**

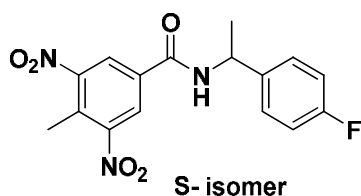

TLC (EtOAc:hexane 2:8):  $R_f = 0.30$ ; Light yellow solid; mp 191.5-192.5 °C;  $^1\text{H}$  NMR (400 MHz,  $\text{CDCl}_3$ )  $\delta$  8.36 (s, 2H), 7.34 (dd,  $J = 8.6, 5.4$  Hz, 2H), 7.04 (t,  $J = 8.7$  Hz, 2H), 6.61 (d,  $J = 6.1$  Hz, 1H), 5.28 (p,  $J = 7.1$  Hz, 1H), 2.60 (s, 3H), 1.62 (d,  $J = 6.9$  Hz, 3H);  $^{13}\text{C}$  NMR (126 MHz, Acetone- $d_6$ )  $\delta$  162.69 (d,  $J = 243.08$  Hz), 162.58, 152.41, 140.99 (d,  $J = 2.99$  Hz), 135.49, 130.31, 129.13 (d,  $J = 8.09$  Hz), 127.09, 115.84 (d,  $J = 21.47$  Hz), 50.00, 22.27, 15.17;  $[\alpha]_D +55.7^\circ$  ( $c$  0.42, Acetone), ee = 100%; HRMS (ESI-TOF) calcd for  $\text{C}_{17}\text{H}_{17}\text{N}_3\text{O}_5$   $[\text{M} - \text{H}]^-$  346.0839, found 346.0841.

**6. (R)-N-(1-(4-Chlorophenyl)ethyl)-4-methyl-3, 5-dinitrobenzamide (7e):**

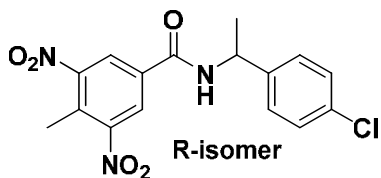

TLC (EtOAc:hexane 2:8):  $R_f = 0.15$ ; Light yellow solid; mp 199-201 °C;  $^1\text{H}$  NMR (400 MHz,  $\text{CDCl}_3$ )  $\delta$  8.38 (s, 2H), 7.36 – 7.28 (m, 4H), 6.70 (d,  $J = 6.9$  Hz, 1H), 5.32 – 5.21 (m, 1H), 2.61 (s, 3H), 1.62 (s, 3H);  $^{13}\text{C}$  NMR (101 MHz, Acetone)  $\delta$  162.64, 152.43, 143.89, 135.47, 133.08, 130.29, 129.27, 128.98, 127.06, 50.15, 22.13, 15.16;  $[\alpha]_D -59.47^\circ$  ( $c$  1.68, Acetone), ee = 100%; HRMS (ESI-TOF) calcd for  $\text{C}_{17}\text{H}_{17}\text{N}_3\text{O}_5$   $[\text{M} - \text{H}]^-$  362.0544, found 362.0555.

**7. (S)-N-(1-(4-Chlorophenyl)ethyl)-4-methyl-3, 5-dinitrobenzamide (7f):**

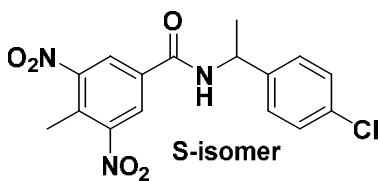

TLC (EtOAc:hexane 2:8):  $R_f = 0.15$ ; Light yellow solid; mp 200-201 °C;  $^1\text{H}$  NMR (400 MHz,  $\text{CDCl}_3$ )  $\delta$  8.29 (s, 2H), 7.29 – 7.17 (m, 5H), 6.55 (d,  $J = 7.0$  Hz, 1H), 5.25 – 5.15 (m, 1H), 2.54 (s, 3H), 1.55 (s, 3H);  $^{13}\text{C}$  NMR (101 MHz, Acetone)  $\delta$  162.64, 152.43, 143.89, 135.47, 133.08, 130.29, 129.27, 128.98, 127.06, 50.15, 22.13, 15.16;  $[\alpha]_D +63.18^\circ$  ( $c$  0.57, Acetone), ee = 100%; HRMS (ESI-TOF) calcd for  $\text{C}_{17}\text{H}_{17}\text{N}_3\text{O}_5$   $[\text{M} - \text{H}]^-$  362.0544, found 362.0555.

**8. (R)-N-(1-(4-methoxyphenyl)ethyl)-4-methyl-3, 5-dinitrobenzamide (7g):**

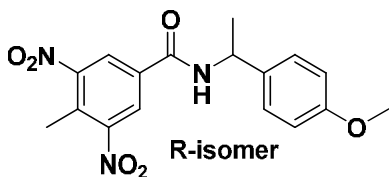

TLC (EtOAc:hexane 2:8):  $R_f = 0.20$ ; Light yellow solid; mp 165-166 °C;  $^1\text{H}$  NMR (400 MHz,  $\text{CDCl}_3$ )  $\delta$  8.35 (s, 2H), 7.29 (d,  $J = 8.6$  Hz, 2H), 6.88 (d,  $J = 8.6$  Hz, 2H), 6.57 (s, 1H),

5.31 – 5.21 (m, 1H), 3.79 (s, 3H), 2.59 (s, 3H), 1.61 (s, 3H);  $^{13}\text{C}$  NMR (126 MHz, Acetone)  $\delta$  162.41, 159.77, 152.39, 136.66, 135.66, 130.20, 128.39, 127.06, 114.54, 55.51, 49.96, 22.17, 15.17;  $[\alpha]_{\text{D}} -46.7^\circ$  ( $c$  0.82, Acetone),  $ee = 100\%$ ; HRMS (ESI-TOF) calcd for  $\text{C}_{17}\text{H}_{17}\text{N}_3\text{O}_5$   $[\text{M} - \text{H}]^-$  358.1039, found 358.1047.

**9. (S)-N-(1-(4-methoxyphenyl)ethyl)-4-methyl-3, 5-dinitrobenzamide (7h):**

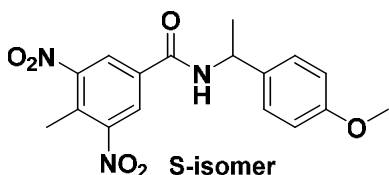

TLC (EtOAc:hexane 2:8):  $R_f = 0.20$ ; Light yellow solid; mp 164-165 °C;  $^1\text{H}$  NMR (400 MHz,  $\text{CDCl}_3$ )  $\delta$  8.35 (s, 2H), 7.31 (d,  $J = 8.5$  Hz, 2H), 6.90 (d,  $J = 8.5$  Hz, 2H), 6.46 (d,  $J = 5.6$  Hz, 1H), 5.28 (dd,  $J = 14.2, 7.3$  Hz, 2H), 3.80 (s, 3H), 2.61 (s, 3H), 1.62 (d,  $J = 6.9$  Hz, 3H);  $^{13}\text{C}$  NMR (126 MHz, Acetone)  $\delta$  162.41, 159.77, 152.39, 136.66, 135.66, 130.20, 128.39, 127.06, 114.54, 55.51, 49.96, 22.17, 15.17;  $[\alpha]_{\text{D}} +50.7^\circ$  ( $c$  0.76, Acetone),  $ee = 100\%$ ; HRMS (ESI-TOF) calcd for  $\text{C}_{17}\text{H}_{17}\text{N}_3\text{O}_5$   $[\text{M} - \text{H}]^-$  358.1039, found 358.1047.

**10. (R)-4-methyl-3, 5-dinitro-N-(1-phenylethyl)benzamide (7i):**

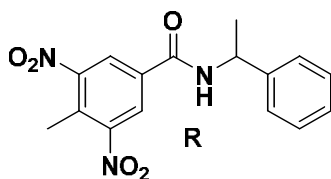

TLC (EtOAc:hexane 2:8):  $R_f = 0.15$ ; Light yellow solid; mp 171-172 °C;  $^1\text{H}$  NMR (400 MHz,  $\text{CDCl}_3$ )  $\delta$  8.35 (s, 2H), 7.36 (d,  $J = 4.3$  Hz, 4H), 7.30 (dd,  $J = 8.2, 3.8$  Hz, 1H), 6.59 (s, 1H), 5.37 – 5.24 (m, 1H), 2.60 (s, 3H), 1.63 (d,  $J = 6.9$  Hz, 3H);  $^{13}\text{C}$  NMR (126 MHz, Acetone)  $\delta$  162.59, 152.39, 144.82, 135.55, 130.27, 129.28, 127.91, 127.16, 127.11, 50.61, 22.29, 15.19;  $[\alpha]_{\text{D}} -58.6^\circ$  ( $c$  0.44, Acetone),  $ee = 98.93\%$ ; HRMS (ESI-TOF) calcd for  $\text{C}_{17}\text{H}_{17}\text{N}_3\text{O}_5$   $[\text{M} - \text{H}]^-$  328.0933, found 328.0942.

**11. (R)-3, 5-Dinitro-N-(1-(p-tolyl)ethyl)benzamide (7j):**

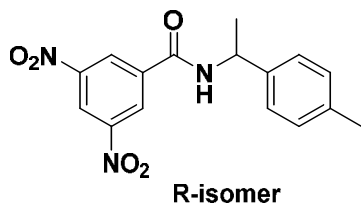

TLC (EtOAc:hexane 2:8):  $R_f = 0.25$ ; Light yellow solid; mp 184-185 °C;  $^1\text{H}$  NMR (400 MHz,  $\text{CDCl}_3$ )  $\delta$  9.14 (t,  $J = 2.0$  Hz, 1H), 8.92 (d,  $J = 2.0$  Hz, 2H), 7.30 (d,  $J = 8.0$  Hz, 2H), 7.20 (d,  $J = 7.9$  Hz, 2H), 6.50 (d,  $J = 6.4$  Hz, 1H), 5.36 – 5.28 (m, 1H), 2.35 (s, 3H), 1.66 (d,  $J = 6.9$  Hz, 3H);  $^{13}\text{C}$  NMR (101 MHz,  $\text{CDCl}_3$ )  $\delta$  161.67, 148.20, 139.63, 137.91, 136.73, 128.82, 127.44, 126.00, 120.34, 49.52, 21.05, 20.59, 12.94;  $[\alpha]_D -46.5^\circ$  ( $c$  0.54, Acetone), ee = 100%; HRMS (ESI-TOF) calcd for  $\text{C}_{17}\text{H}_{17}\text{N}_3\text{O}_5$   $[\text{M} + \text{H}]^+$  330.109, found 330.1083.

**12. (S)-3,5-Dinitro-N-(1-(p-tolyl)ethyl)benzamide (7k):**

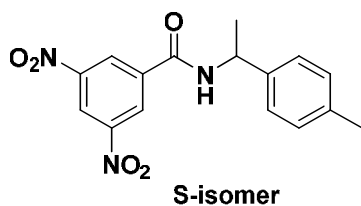

TLC (EtOAc:hexane 2:8):  $R_f = 0.25$ ; Light yellow solid; mp 184-185 °C;  $^1\text{H}$  NMR (400 MHz,  $\text{CDCl}_3$ )  $\delta$  9.15 (t,  $J = 2.0$  Hz, 1H), 8.92 (d,  $J = 2.0$  Hz, 2H), 7.30 (d,  $J = 8.0$  Hz, 2H), 7.20 (d,  $J = 7.9$  Hz, 2H), 6.50 (d,  $J = 6.4$  Hz, 1H), 5.36 – 5.28 (m, 1H), 2.35 (s, 3H), 1.66 (d,  $J = 6.9$  Hz, 3H);  $^{13}\text{C}$  NMR (101 MHz,  $\text{CDCl}_3$ )  $\delta$  161.67, 148.20, 139.63, 137.91, 136.73, 128.82, 127.44, 126.00, 120.34, 49.52, 21.05, 20.59, 12.94;  $[\alpha]_D +48.0^\circ$  ( $c$  0.36, Acetone), ee = 100%; HRMS (ESI-TOF) calcd for  $\text{C}_{17}\text{H}_{17}\text{N}_3\text{O}_5$   $[\text{M} - \text{H}]^-$  328.0933, found 328.0940.

**13. (R)-N-(1-(4-Fluorophenyl)ethyl)-3, 5-dinitrobenzamide (7l):**

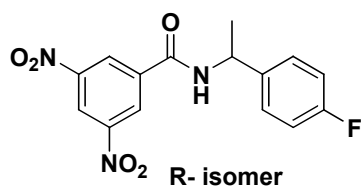



TLC (EtOAc:hexane 2:8):  $R_f = 0.20$ ; Light yellow solid; mp 197-198 °C;  $^1\text{H}$  NMR (400 MHz,  $\text{CDCl}_3$ )  $\delta$  9.17 (t,  $J = 2.0$  Hz, 1H), 8.93 (d,  $J = 2.0$  Hz, 2H), 7.39 (dd,  $J = 8.7, 5.2$  Hz, 2H), 7.08 (t,  $J = 8.6$  Hz, 2H), 6.52 (d,  $J = 6.6$  Hz, 1H), 5.39 – 5.30 (m, 1H), 1.68 (d,  $J = 6.9$  Hz, 3H);  $^{13}\text{C}$  NMR (126 MHz, Acetone)  $\delta$  162.73 (d,  $J = 243.07$  Hz), 162.62, 162.55, 149.57, 138.69 (d,  $J = 3.89$  Hz), 129.18 (d,  $J = 8.12$  Hz), 128.38, 121.64, 115.86 (d,  $J = 21.42$  Hz), 50.03, 22.12;  $[\alpha]_D -42.23^\circ$  ( $c$  0.43, Acetone), ee = 100%; HRMS (ESI-TOF) calcd for  $\text{C}_{17}\text{H}_{17}\text{N}_3\text{O}_5$   $[\text{M} - \text{H}]^-$  332.0682, found 332.06904.

**14. (S)-N-(1-(4-fluorophenyl)ethyl)-3, 5-dinitrobenzamide (7m):**

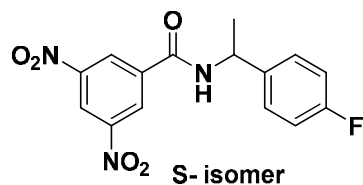

TLC (EtOAc:hexane 2:8):  $R_f = 0.20$ ; Light yellow solid; mp 199-200 °C;  $^1\text{H}$  NMR (400 MHz,  $\text{CDCl}_3$ )  $\delta$  9.16 (t,  $J = 2.0$  Hz, 1H), 8.94 (d,  $J = 0.7$  Hz, 2H), 7.39 (dd,  $J = 8.5, 5.3$  Hz, 2H), 7.07 (t,  $J = 8.6$  Hz, 2H), 6.57 (s, 1H), 5.35 (p,  $J = 7.0$  Hz, 1H), 1.67 (d,  $J = 6.9$  Hz, 3H);  $^{13}\text{C}$  NMR (126 MHz, Acetone)  $\delta$  162.73 (d,  $J = 243.07$  Hz), 162.62, 162.55, 149.57, 138.69 (d,  $J = 3.89$  Hz), 129.18 (d,  $J = 8.12$  Hz), 128.38, 121.64, 115.86 (d,  $J = 21.42$  Hz), 50.03, 22.12;  $[\alpha]_D +49.0^\circ$  ( $c$  0.4, Acetone), ee = 100%; HRMS (ESI-TOF) calcd for  $\text{C}_{17}\text{H}_{17}\text{N}_3\text{O}_5$   $[\text{M} - \text{H}]^-$  332.0682, found 332.0695.

**15. (R)-N-(1-(4-Chlorophenyl)ethyl)-3, 5-dinitrobenzamide (7n):**

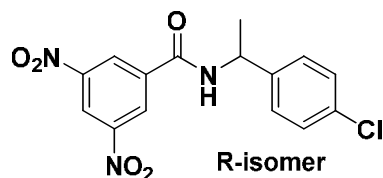

TLC (EtOAc:hexane 2:8):  $R_f = 0.25$ ; Light yellow solid; mp 177-178 °C;  $^1\text{H}$  NMR (400 MHz,  $\text{CDCl}_3$ )  $\delta$  9.16 (t,  $J = 3.5$  Hz, 1H), 8.94 (d,  $J = 3.5$  Hz, 2H), 7.36 – 7.31 (m, 4H), 6.67 (s, 1H), 5.35 – 5.26 (m, 1H), 1.66 (d,  $J = 7.0$  Hz, 3H);  $^{13}\text{C}$  NMR (126 MHz, Acetone)  $\delta$

162.67, 149.55, 143.82, 138.57, 133.14, 129.29, 129.04, 128.40, 121.70, 50.28, 22.07;  $[\alpha]_D - 51.9^\circ$  (*c* 0.67, Acetone), ee = 100%; HRMS (ESI-TOF) calcd for  $C_{17}H_{17}N_3O_5$   $[M - H]^-$  348.0378, found 348.0397.

**16. (S)-N-(1-(4-Chlorophenyl)ethyl)-3,5-dinitrobenzamide (7o):**

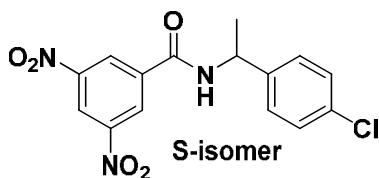

TLC (EtOAc:hexane 2:8):  $R_f = 0.25$ ; Light yellow solid; mp 180-181 °C;  $^1H$  NMR (400 MHz,  $CDCl_3$ )  $\delta$  9.16 (t,  $J = 3.5$  Hz, 1H), 8.94 (d,  $J = 3.5$  Hz, 2H), 7.36 – 7.31 (m, 4H), 6.67 (s, 1H), 5.35 – 5.26 (m, 1H), 1.66 (d,  $J = 7.0$  Hz, 3H);  $^{13}C$  NMR (126 MHz, Acetone)  $\delta$  162.67, 149.55, 143.82, 138.57, 133.14, 129.29, 129.04, 128.40, 121.70, 50.28, 22.07;  $[\alpha]_D +55.0^\circ$  (*c* 0.68, Acetone), ee = 100%; HRMS (ESI-TOF) calcd for  $C_{17}H_{17}N_3O_5$   $[M - H]^-$  348.0378, found 348.0398.

**17. (R)-N-(1-(4-Methoxyphenyl)ethyl)-3,5-dinitrobenzamide (7p):**

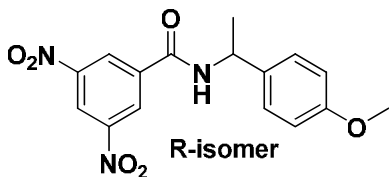

TLC (EtOAc:hexane 2:8):  $R_f = 0.15$ ; Light yellow solid; mp 162-163 °C;  $^1H$  NMR (400 MHz,  $CDCl_3$ )  $\delta$  9.14 (t,  $J = 2.1$  Hz, 1H), 8.92 (d,  $J = 2.0$  Hz, 2H), 7.32 (d,  $J = 8.6$  Hz, 2H), 6.90 (d,  $J = 8.7$  Hz, 2H), 6.57 (d,  $J = 6.6$  Hz, 1H), 5.30 (p,  $J = 7.1$  Hz, 1H), 3.80 (s, 3H), 1.65 (d,  $J = 6.9$  Hz, 3H);  $^{13}C$  NMR (126 MHz, Acetone)  $\delta$  162.42, 159.80, 149.54, 138.85, 136.62, 128.45, 128.36, 121.56, 114.56, 55.51, 50.09, 22.09;  $[\alpha]_D -36.99^\circ$  (*c* 0.44, Acetone), ee = 100%; HRMS (ESI-TOF) calcd for  $C_{17}H_{17}N_3O_5$   $[M - H]^-$  342.0882, found 342.0892.

**18. (S)-N-(1-(4-Methoxyphenyl)ethyl)-3,5-dinitrobenzamide (7q):**

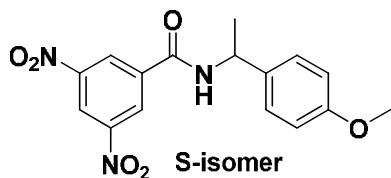

TLC (EtOAc:hexane 2:8):  $R_f = 0.15$ ; Light yellow solid; mp 164-165 °C;  $^1\text{H}$  NMR (400 MHz,  $\text{CDCl}_3$ )  $\delta$  9.14 (t,  $J = 2.1$  Hz, 1H), 8.92 (d,  $J = 2.0$  Hz, 2H), 7.32 (d,  $J = 8.6$  Hz, 2H), 6.90 (d,  $J = 8.7$  Hz, 2H), 6.57 (d,  $J = 6.6$  Hz, 1H), 5.30 (p,  $J = 7.1$  Hz, 1H), 3.80 (s, 3H), 1.65 (d,  $J = 6.9$  Hz, 3H);  $^{13}\text{C}$  NMR (126 MHz, Acetone)  $\delta$  162.42, 159.80, 149.54, 138.85, 136.62, 128.45, 128.36, 121.56, 114.56, 55.51, 50.09, 22.09;  $[\alpha]_D +35.5^\circ$  ( $c$  0.45, Acetone), ee = 99.29%; HRMS (ESI-TOF) calcd for  $\text{C}_{17}\text{H}_{17}\text{N}_3\text{O}_5$   $[\text{M} - \text{H}]^-$  342.0882, found 344.0892.

**19. (R)-3, 5-Dinitro-*N*-(1-phenylethyl)benzamide (7r):**

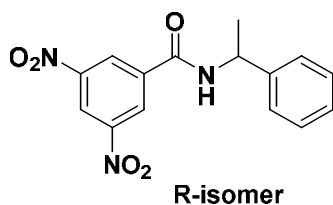

TLC (EtOAc:hexane 2:8):  $R_f = 0.25$ ; Light yellow solid; mp 157-158 °C;  $^1\text{H}$  NMR (400 MHz,  $\text{CDCl}_3$ )  $\delta$  9.13 (t,  $J = 2.1$  Hz, 1H), 8.94 (d,  $J = 2.0$  Hz, 2H), 7.40 – 7.28 (m, 5H), 6.75 (d,  $J = 6.9$  Hz, 1H), 5.33 (dt,  $J = 14.1, 6.9$  Hz, 1H), 1.67 (d,  $J = 6.9$  Hz, 3H);  $^{13}\text{C}$  NMR (126 MHz, Acetone)  $\delta$  162.56, 149.55, 144.78, 138.74, 129.30, 128.40, 127.96, 127.21, 121.63, 50.72, 22.20;  $[\alpha]_D -46.3^\circ$  ( $c$  0.6, Acetone), ee = 100%; HRMS (ESI-TOF) calcd for  $\text{C}_{17}\text{H}_{17}\text{N}_3\text{O}_5$   $[\text{M} - \text{H}]^-$  314.0776, found 314.0787.

**20. (S)-3, 5-dinitro-*N*-(1-phenylethyl)benzamide (7s):**

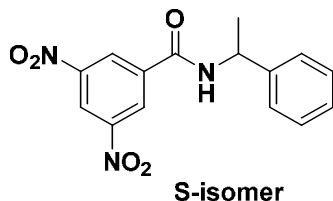

TLC (EtOAc:hexane 2:8):  $R_f = 0.25$ ; Light yellow solid; mp 156-157 °C;  $^1\text{H}$  NMR (400 MHz,  $\text{CDCl}_3$ )  $\delta$  9.14 (t,  $J = 2.0$  Hz, 1H), 8.93 (d,  $J = 2.0$  Hz, 2H), 7.43 – 7.29 (m, 5H), 6.66 (d,  $J = 7.9$  Hz, 1H), 5.35 (dt,  $J = 14.3, 7.0$  Hz, 1H), 1.67 (d,  $J = 6.9$  Hz, 3H);  $^{13}\text{C}$  NMR (126 MHz, Acetone)  $\delta$  162.56, 149.55, 144.78, 138.74, 129.30, 128.40, 127.96, 127.21, 121.63, 50.72, 22.20;  $[\alpha]_D^{25} +54.7^\circ$  ( $c$  0.46, Acetone), ee = 100%; HRMS (ESI-TOF) calcd for  $\text{C}_{17}\text{H}_{17}\text{N}_3\text{O}_5$   $[\text{M} - \text{H}]^-$  314.0776, found 314.0782.

**21. (R)-3, 5-dinitro-*N*-(1-phenylpropyl)benzamide (7t):**

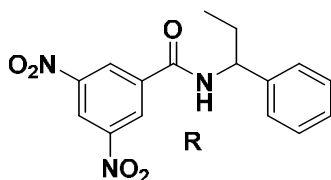

TLC (EtOAc:hexane 2:8):  $R_f = 0.35$ ; Light yellow solid; mp 173-174 °C;  $^1\text{H}$  NMR (400 MHz,  $\text{CDCl}_3$ )  $\delta$  9.19 – 9.12 (m, 1H), 8.92 (d,  $J = 1.5$  Hz, 2H), 7.38 – 7.32 (m, 3H), 7.32 – 7.27 (m, 2H), 6.66 (s, 1H), 5.08 (dd,  $J = 15.2, 7.6$  Hz, 1H), 2.02 (dtd,  $J = 21.3, 14.0, 7.3$  Hz, 2H), 0.98 (t,  $J = 7.3$  Hz, 3H);  $^{13}\text{C}$  NMR (101 MHz, Acetone)  $\delta$  204.24, 162.89, 149.57, 143.82, 138.82, 129.26, 128.36, 128.00, 127.74, 121.59, 57.14, 29.58, 11.75;  $[\alpha]_D^{25} -30.59^\circ$  ( $c$  0.5, Acetone), ee = 100%; HRMS (ESI-TOF) calcd for  $\text{C}_{17}\text{H}_{17}\text{N}_3\text{O}_5$   $[\text{M} - \text{H}]^-$  328.0933, found 328.0939.

**22. (S)-3, 5-dinitro-*N*-(1-phenylpropyl)benzamide (7u):**

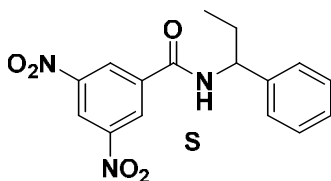

TLC (EtOAc:hexane 2:8):  $R_f = 0.35$ ; Light yellow solid; mp 175-176 °C;  $^1\text{H}$  NMR (400 MHz,  $\text{CDCl}_3$ )  $\delta$  9.17 – 9.12 (m, 1H), 8.93 (d,  $J = 2.1$  Hz, 2H), 7.36 (d,  $J = 3.5$  Hz, 4H), 7.33 – 7.28 (m, 1H), 6.66 (s, 1H), 5.09 (q,  $J = 7.6$  Hz, 1H), 2.11 – 1.93 (m, 2H), 0.98 (t,  $J = 7.4$  Hz,

3H);  $^{13}\text{C}$  NMR (101 MHz, Acetone)  $\delta$  204.24, 162.89, 149.57, 143.82, 138.82, 129.26, 128.36, 128.00, 127.74, 121.59, 57.14, 29.58, 11.75;  $[\alpha]_{\text{D}} +35.8^\circ$  ( $c$  0.36, Acetone), ee = 100%; HRMS (ESI-TOF) calcd for  $\text{C}_{17}\text{H}_{17}\text{N}_3\text{O}_5$   $[\text{M} - \text{H}]^-$  328.0933, found 328.0941.

**23. (*R*)-3, 5-dinitro-*N*-(1-phenylbutyl)benzamide (7v):**

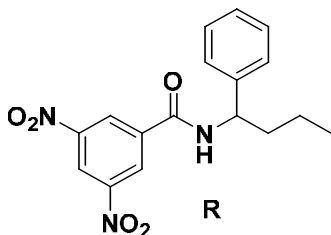

TLC (EtOAc:hexane 2:8):  $R_f = 0.35$ ; Light yellow solid; mp 158-159  $^\circ\text{C}$ ;  $^1\text{H}$  NMR (400 MHz,  $\text{CDCl}_3$ )  $\delta$  9.15 – 9.12 (m, 1H), 8.92 (d,  $J = 2.0$  Hz, 2H), 7.36 (d,  $J = 4.3$  Hz, 3H), 7.28 (dd,  $J = 10.6, 5.8$  Hz, 2H), 6.60 (s, 1H), 5.18 (dd,  $J = 15.3, 7.6$  Hz, 1H), 1.97 (dd,  $J = 15.9, 8.7$  Hz, 2H), 1.39 – 1.25 (m, 2H), 0.98 (t,  $J = 7.3$  Hz, 3H);  $^{13}\text{C}$  NMR (126 MHz, Acetone)  $\delta$  162.81, 149.56, 144.11, 138.74, 129.29, 128.38, 127.98, 127.68, 121.73, 55.18, 38.96, 20.55, 14.06;  $[\alpha]_{\text{D}} -32.4^\circ$  ( $c$  0.5, Acetone), ee = 100%; HRMS (ESI-TOF) calcd for  $\text{C}_{17}\text{H}_{17}\text{N}_3\text{O}_5$   $[\text{M} - \text{H}]^-$  342.1089, found 342.1096.

**24. (*R*)-*N*-(*sec*-Butyl)-3, 5-dinitrobenzamide (8a):**

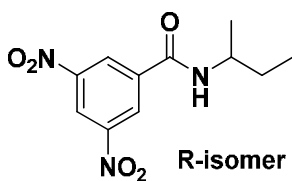

TLC (EtOAc:hexane 1:9):  $R_f = 0.15$ ; Light yellow solid; mp 156-157  $^\circ\text{C}$ ;  $^1\text{H}$  NMR (400 MHz,  $\text{CDCl}_3$ )  $\delta$  9.19 (t,  $J = 2.1$  Hz, 1H), 8.95 (d,  $J = 2.1$  Hz, 2H), 6.10 (d,  $J = 6.6$  Hz, 1H), 4.26 – 4.15 (m, 1H), 1.67 (ddd,  $J = 14.4, 7.3, 2.2$  Hz, 2H), 1.33 (d,  $J = 6.6$  Hz, 3H), 1.03 (t,  $J = 7.4$  Hz, 3H);  $^{13}\text{C}$  NMR (126 MHz, Acetone)  $\delta$  162.66, 149.55, 139.14, 128.23, 121.45, 48.73,  $^{13}\text{C}$  NMR (126 MHz, Acetone)  $\delta$  162.66, 149.55, 139.14, 128.23, 121.45, 48.73,

29.98, 20.48, 11.05;  $[\alpha]_D -22.7^\circ$  ( $c$  0.4, Acetone),  $ee = 100\%$ ; HRMS (ESI-TOF) calcd for  $C_{17}H_{17}N_3O_5$   $[M - H]^-$  266.0776, found 266.0781.

**25. (S)-N-(sec-butyl)-3, 5-dinitrobenzamide (8b):**

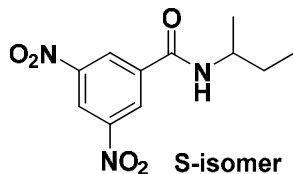

TLC (EtOAc:hexane 1:9):  $R_f = 0.15$ ; Light yellow solid; mp 174-175 °C;  $^1H$  NMR (400 MHz,  $CDCl_3$ )  $\delta$  9.19 (t,  $J = 2.0$  Hz, 2H), 8.96 (d,  $J = 2.0$  Hz, 5H), 6.13 (d,  $J = 7.5$  Hz, 2H), 4.21 (tq,  $J = 13.4, 6.7$  Hz, 3H), 1.68 (dtd,  $J = 14.3, 7.3, 2.3$  Hz, 7H), 1.33 (d,  $J = 6.6$  Hz, 8H), 1.03 (t,  $J = 7.4$  Hz, 8H);  $^{13}C$  NMR (126 MHz, Acetone)  $\delta$  162.66, 149.55, 139.14, 128.23, 121.45, 48.73,  $^{13}C$  NMR (126 MHz, Acetone)  $\delta$  162.66, 149.55, 139.14, 128.23, 121.45, 48.73, 29.98, 20.48, 11.05;  $[\alpha]_D +31.2^\circ$  ( $c$  0.41, Acetone),  $ee = 100\%$ ; HRMS (ESI-TOF) calcd for  $C_{17}H_{17}N_3O_5$   $[M - H]^-$  266.0776, found 266.0788.

**26. (R)-N-(Heptan-2-yl)-3, 5-dinitrobenzamide (8c):**

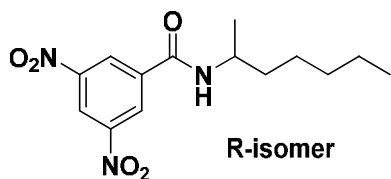

TLC (EtOAc:hexane 1:9):  $R_f = 0.20$ ; Light yellow solid; mp 135-136 °C;  $^1H$  NMR (500 MHz,  $CDCl_3$ )  $\delta$  9.17 (t,  $J = 2.0$  Hz, 1H), 8.94 (d,  $J = 2.0$  Hz, 2H), 6.15 (d,  $J = 7.5$  Hz, 1H), 4.30 – 4.20 (m, 1H), 1.68 – 1.54 (m, 5H), 1.44 – 1.28 (m, 6H), 0.90 (t,  $J = 7.0$  Hz, 3H);  $^{13}C$  NMR (126 MHz, Acetone)  $\delta$  162.55, 149.55, 139.15, 128.22, 121.44, 47.20, 37.16, 32.47, 26.75, 23.29, 21.02, 14.35;  $[\alpha]_D -34.3^\circ$  ( $c$  0.94, Acetone),  $ee = 100\%$ ; HRMS (ESI-TOF) calcd for  $C_{17}H_{17}N_3O_5$   $[M - H]^-$  308.1246, found 308.1251.

**27. (S)-N-(Heptan-2-yl)-3, 5-dinitrobenzamide (8d):**

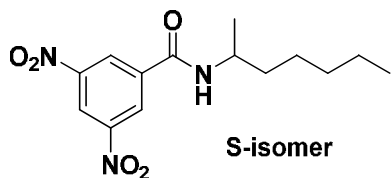

TLC (EtOAc:hexane 1:9):  $R_f = 0.20$ ; Light yellow solid; mp 135-136 °C;  $^1\text{H}$  NMR (500 MHz,  $\text{CDCl}_3$ )  $\delta$  9.17 (t,  $J = 2.0$  Hz, 1H), 8.94 (d,  $J = 2.0$  Hz, 2H), 6.15 (d,  $J = 7.5$  Hz, 1H), 4.30 – 4.20 (m, 1H), 1.68 – 1.54 (m, 5H), 1.44 – 1.28 (m, 6H), 0.90 (t,  $J = 7.0$  Hz, 3H);  $^{13}\text{C}$  NMR (126 MHz, Acetone)  $\delta$  162.55, 149.55, 139.15, 128.22, 121.44, 47.20, 37.16, 32.47, 26.75, 23.29, 21.02, 14.35;  $[\alpha]_D +35.8^\circ$  ( $c$  0.73, Acetone), ee = 100%; HRMS (ESI-TOF) calcd for  $\text{C}_{17}\text{H}_{17}\text{N}_3\text{O}_5$   $[\text{M} - \text{H}]^-$  308.1246, found 308.1254.

**28. N-Hexyl-3, 5-dinitrobenzamide (8e):**

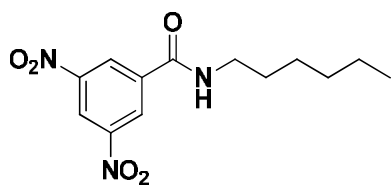

TLC (EtOAc:hexane 1:9):  $R_f = 0.30$ ; Light yellow solid; mp 90-91 °C;  $^1\text{H}$  NMR (400 MHz,  $\text{CDCl}_3$ )  $\delta$  9.16 (t,  $J = 2.0$  Hz, 1H), 8.95 (d,  $J = 2.0$  Hz, 2H), 6.48 (s, 1H), 3.53 (dd,  $J = 13.6$ , 6.6 Hz, 2H), 1.72 – 1.64 (m, 2H), 1.45 – 1.31 (m, 6H), 0.91 (t,  $J = 6.9$  Hz, 3H); HRMS (ESI-TOF) calcd for  $\text{C}_{17}\text{H}_{17}\text{N}_3\text{O}_5$   $[\text{M} - \text{H}]^-$  294.1089, found 294.1090.

**29. 3, 5-Dinitro-N-hexadecylbenzamide (8f):**

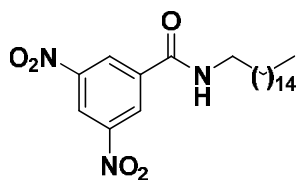

TLC (EtOAc:hexane 1:9):  $R_f = 0.35$ ; Light yellow solid; mp 102-103 °C;  $^1\text{H}$  NMR (400 MHz,  $\text{CDCl}_3$ )  $\delta$  9.14 (t,  $J = 2.0$  Hz, 1H), 8.93 (d,  $J = 2.0$  Hz, 2H), 6.38 (d,  $J = 1.9$  Hz, 1H),

3.51 (dd,  $J = 13.2, 7.1$  Hz, 2H), 1.66 (dt,  $J = 14.8, 7.4$  Hz, 2H), 1.24 (m, 26H), 0.86 (t,  $J = 6.8$  Hz, 3H); HRMS (ESI-TOF) calcd for  $C_{17}H_{17}N_3O_5$   $[M - H]^-$  434.2654, found 434.2661.

**30. 3,5-Dinitro-*N*-phenethylbenzamide (9a):**

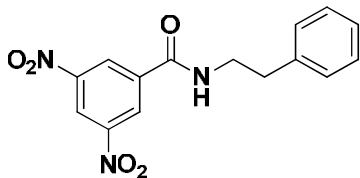

TLC (EtOAc:hexane 2:8):  $R_f = 0.25$ ; Light yellow solid; mp 148-149 °C;  $^1H$  NMR (400 MHz,  $CDCl_3$ )  $\delta$  9.14 (t,  $J = 2.0$  Hz, 1H), 8.85 (d,  $J = 2.1$  Hz, 2H), 7.36 (t,  $J = 7.3$  Hz, 2H), 7.31 – 7.27 (m, 1H), 7.24 (d,  $J = 5.1$  Hz, 2H), 6.32 (s, 1H), 3.80 (dd,  $J = 12.8, 6.8$  Hz, 2H), 2.99 (dd,  $J = 12.5, 5.6$  Hz, 2H);  $^{13}C$  NMR (126 MHz, Acetone)  $\delta$  163.30, 149.56, 140.21, 138.84, 129.66, 129.33, 128.17, 127.18, 121.55, 42.57, 36.09, 11.79; HRMS (ESI-TOF) calcd for  $C_{17}H_{17}N_3O_5$   $[M - H]^-$  314.0776, found 314.0780.

**31. *N*-Benzyl-4-methyl-3, 5-dinitrobenzamide (9b):**

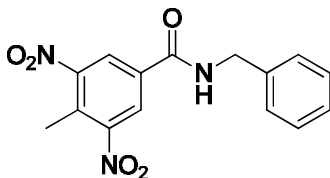

TLC (EtOAc:hexane 2:8):  $R_f = 0.25$ ; Light yellow solid; mp 180-181 °C;  $^1H$  NMR (400 MHz,  $CDCl_3$ )  $\delta$  8.39 (s, 1H), 7.46 – 7.30 (m, 3H), 6.55 (s, 2H), 4.66 (d,  $J = 5.6$  Hz, 2H), 2.62 (s, 3H);  $^{13}C$  NMR (126 MHz, Acetone)  $\delta$  163.30, 152.41, 139.59, 135.35, 130.33, 129.32, 128.73, 128.06, 127.08, 44.63, 15.03; HRMS (ESI-TOF) calcd for  $C_{17}H_{17}N_3O_5$   $[M - H]^-$  314.0776, found 314.0787.

**32. 4-Methyl-*N*-(4-methylbenzyl)-3, 5-dinitrobenzamide (9c):**

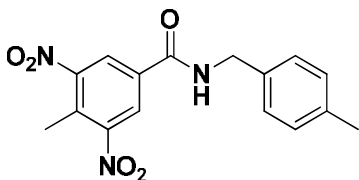



TLC (EtOAc:hexane 2:8):  $R_f = 0.35$ ; Light yellow solid; mp 197-198 °C;  $^1\text{H}$  NMR (400 MHz,  $\text{CDCl}_3$ )  $\delta$  8.38 (s, 2H), 7.18 – 7.21 (m, 4H), 6.51 (s, 1H), 4.61 (d,  $J = 5.4$  Hz, 2H), 2.61 (s, 3H), 2.35 (s, 3H);  $^{13}\text{C}$  NMR (126 MHz, Acetone)  $\delta$  163.20, 152.46, 137.55, 136.60, 135.49, 130.33, 129.90, 128.70, 127.06, 44.22, 21.13, 15.19; HRMS (ESI-TOF) calcd for  $\text{C}_{17}\text{H}_{17}\text{N}_3\text{O}_5$  [ $\text{M} - \text{H}$ ] 328.0933, found 328.0943.

**33. *N*-(4-Methylbenzyl)-3,5-dinitrobenzamide (9d):**

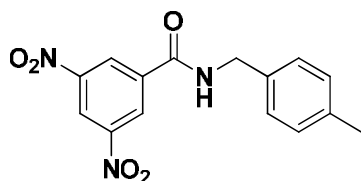

TLC (EtOAc:hexane 2:8):  $R_f = 0.25$ ; Light yellow solid; mp 180-181 °C;  $^1\text{H}$  NMR (400 MHz,  $\text{CDCl}_3$ )  $\delta$  9.16 (t,  $J = 2.0$  Hz, 1H), 8.95 (d,  $J = 2.0$  Hz, 2H), 7.27 (d,  $J = 6.5$  Hz, 2H), 7.20 (d,  $J = 7.9$  Hz, 2H), 6.61 (s, 1H), 4.65 (d,  $J = 5.5$  Hz, 2H), 2.36 (s, 3H);  $^{13}\text{C}$  NMR (126 MHz, Acetone)  $\delta$  163.25, 149.59, 138.70, 137.60, 136.55, 129.91, 128.75, 128.33, 121.62, 44.36, 21.08; HRMS (ESI-TOF) calcd for  $\text{C}_{17}\text{H}_{17}\text{N}_3\text{O}_5$  [ $\text{M} - \text{H}$ ] 314.0776, found 314.0782.

**34. *N*-Benzyl-3,5-dinitrobenzamide (9e):**

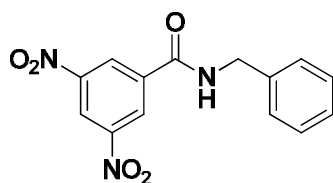

TLC (EtOAc:hexane 2:8):  $R_f = 0.20$ ; Light yellow solid; mp 198.5-199.5 °C;  $^1\text{H}$  NMR (400 MHz, Acetone)  $\delta$  9.15 (d,  $J = 2.0$  Hz, 2H), 9.08 (t,  $J = 2.1$  Hz, 1H), 8.94 (s, 1H), 7.42 (d,  $J = 7.4$  Hz, 2H), 7.34 (t,  $J = 7.4$  Hz, 2H), 7.27 (t,  $J = 7.3$  Hz, 1H), 4.69 (d,  $J = 5.4$  Hz, 2H);  $^{13}\text{C}$  NMR (126 MHz, Acetone)  $\delta$  163.31, 149.63, 139.63, 138.67, 129.34, 128.72, 128.35, 128.11, 121.67, 44.57; HRMS (ESI-TOF) calcd for  $\text{C}_{17}\text{H}_{17}\text{N}_3\text{O}_5$  [ $\text{M} - \text{H}$ ] 300.0620, found 300.0626.

**35. *N*-(4-Methylphenethyl)-3,5-dinitrobenzamide (9f):**

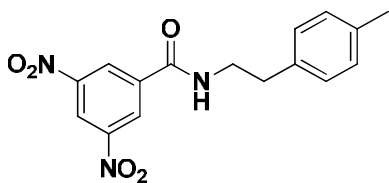

TLC (EtOAc:hexane 2:8):  $R_f = 0.35$ ; Light yellow solid; mp 175-176 °C;  $^1\text{H}$  NMR (400 MHz,  $\text{CDCl}_3$ )  $\delta$  9.14 (t,  $J = 2.0$  Hz, 1H), 8.84 (d,  $J = 2.1$  Hz, 2H), 7.15 (q,  $J = 8.0$  Hz, 4H), 6.30 (s, 1H), 3.77 (dd,  $J = 12.8, 6.7$  Hz, 2H), 2.95 (t,  $J = 6.8$  Hz, 2H), 2.34 (s, 3H);  $^{13}\text{C}$  NMR (126 MHz, Acetone)  $\delta$  163.28, 149.57, 138.89, 137.10, 136.43, 129.94, 129.56, 128.17, 121.53, 42.66, 35.67, 21.05; HRMS (ESI-TOF) calcd for  $\text{C}_{17}\text{H}_{17}\text{N}_3\text{O}_5$   $[\text{M} - \text{H}]^-$  328.0933, found 328.0926.

**36. 3,5-Dinitro-*N*-(3-phenylpropyl)benzamide (9g):**

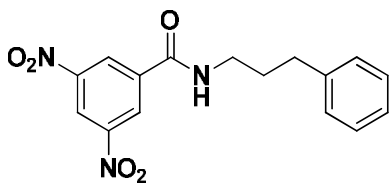

TLC (EtOAc:hexane 2:8):  $R_f = 0.35$ ; Light yellow solid; mp 120-121 °C;  $^1\text{H}$  NMR (400 MHz,  $\text{CDCl}_3$ )  $\delta$  9.12 (d,  $J = 3.3$  Hz, 1H), 8.77 – 8.73 (m, 2H), 7.36 – 7.27 (m, 2H), 7.27 – 7.17 (m, 3H), 6.22 (s, 1H), 3.60 (tt,  $J = 10.1, 5.0$  Hz, 2H), 2.78 (t,  $J = 7.0$  Hz, 2H), 2.09 – 2.01 (m, 2H);  $^{13}\text{C}$  NMR (126 MHz, Acetone)  $\delta$  163.26, 149.54, 142.71, 138.91, 129.24, 129.21, 128.21, 126.69, 121.50, 40.72, 33.88, 31.83; HRMS (ESI-TOF) calcd for  $\text{C}_{17}\text{H}_{17}\text{N}_3\text{O}_5$   $[\text{M} - \text{H}]^-$  328.0933, found 328.0938.

**37. 3,5-Dinitro-*N*-(4-phenylbutyl)benzamide (9h):**

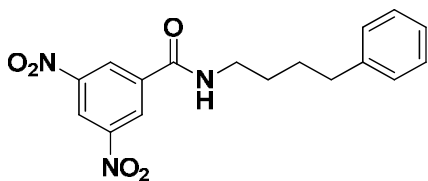

TLC (EtOAc:hexane 2:8):  $R_f = 0.35$ ; Light yellow solid; mp 160-161 °C;  $^1\text{H}$  NMR (400 MHz,  $\text{CDCl}_3$ )  $\delta$  9.15 (d,  $J = 2.0$  Hz, 1H), 8.95 – 8.90 (m, 2H), 7.29 (d,  $J = 7.6$  Hz, 2H), 7.19

(t,  $J = 6.3$  Hz, 3H), 6.43 (s, 1H), 3.63 – 3.46 (m, 2H), 2.69 (t,  $J = 6.9$  Hz, 2H), 1.84 – 1.63 (m, 4H);  $^{13}\text{C}$  NMR (126 MHz, Acetone)  $\delta$  163.15, 149.58, 143.23, 138.94, 129.25, 129.14, 128.19, 126.57, 121.48, 40.72, 36.09; HRMS (ESI-TOF) calcd for  $\text{C}_{17}\text{H}_{17}\text{N}_3\text{O}_5$   $[\text{M} - \text{H}]^-$  342.1089, found 342.1095.

**38. *N*-(4-Fluorophenyl)-3, 5-dinitrobenzamide (10a):**

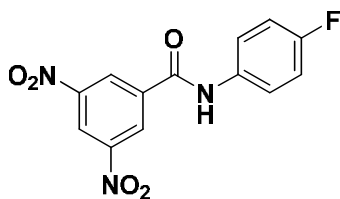

TLC (EtOAc:hexane 3:7):  $R_f = 0.25$ ; Light yellow solid; mp 226-227 °C;  $^1\text{H}$  NMR (400 MHz, Acetone)  $\delta$  10.31 (s, 3H), 9.20 (d,  $J = 1.9$  Hz, 2H), 9.11 (t,  $J = 1.8$  Hz, 9H), 7.86 (dd,  $J = 8.7, 4.9$  Hz, 30H), 7.17 (t,  $J = 8.8$  Hz, 28H); HRMS (ESI-TOF) calcd for  $\text{C}_{17}\text{H}_{17}\text{N}_3\text{O}_5$   $[\text{M} - \text{H}]^-$  304.0369, found 304.0380.

**39. 3,5-Dinitro-*N*-(4-(trifluoromethoxy)phenyl)benzamide (10b):**

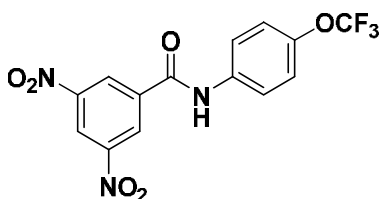

TLC (EtOAc:hexane 3:7):  $R_f = 0.35$ ; Light yellow solid; mp 194-195 °C;  $^1\text{H}$  NMR (400 MHz, Acetone)  $\delta$  10.40 (s, 1H), 9.22 (d,  $J = 2.0$  Hz, 2H), 9.13 (t,  $J = 2.0$  Hz, 1H), 7.98 (d,  $J = 9.0$  Hz, 3H), 7.39 (d,  $J = 8.6$  Hz, 3H); HRMS (ESI-TOF) calcd for  $\text{C}_{17}\text{H}_{17}\text{N}_3\text{O}_5$   $[\text{M} - \text{H}]^-$  370.0286, found 370.0294.

**40. 3,5-Dinitro-*N*-(4-(trifluoromethyl)phenyl)benzamide (10c):**

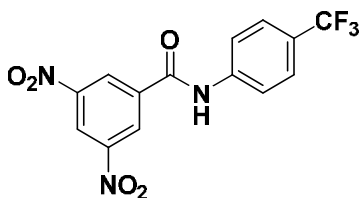

TLC (EtOAc:hexane 3:7):  $R_f = 0.35$ ; Light yellow solid; mp 210-211 °C;  $^1\text{H NMR}$  (400 MHz, Acetone)  $\delta$  9.23 (d,  $J = 2.1$  Hz, 2H), 9.14 (t,  $J = 2.1$  Hz, 1H), 8.08 (d,  $J = 8.5$  Hz, 2H), 8.01 (s, 1H), 7.76 (d,  $J = 8.5$  Hz, 2H); HRMS (ESI-TOF) calcd for  $\text{C}_{17}\text{H}_{17}\text{N}_3\text{O}_5$   $[\text{M} - \text{H}]^-$  354.0337, found 354.0345.

**41. 3,5-Dinitro-*N*-(2-(trifluoromethyl)phenyl)benzamide (10d):**

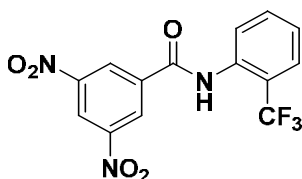

TLC (EtOAc:hexane 3:7):  $R_f = 0.15$ ; Light yellow solid; mp 224-225 °C;  $^1\text{H NMR}$  (400 MHz, Acetone)  $\delta$  9.20 (d,  $J = 2.1$  Hz, 2H), 9.16 (t,  $J = 2.1$  Hz, 1H), 8.01 (s, 1H), 7.86 (d,  $J = 7.7$  Hz, 1H), 7.80 (d,  $J = 3.9$  Hz, 2H), 7.61 (dt,  $J = 8.6, 4.5$  Hz, 1H); HRMS (ESI-TOF) calcd for  $\text{C}_{17}\text{H}_{17}\text{N}_3\text{O}_5$   $[\text{M} - \text{H}]^-$  354.0337, found 354.0351.

**42. *N*-(3-Fluorophenyl)-3, 5-dinitrobenzamide (10e):**

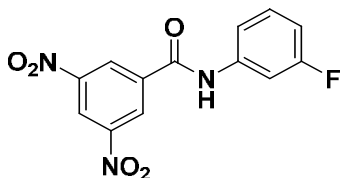

TLC (EtOAc:hexane 3:7):  $R_f = 0.25$ ; Light yellow solid; mp 197-198 °C;  $^1\text{H NMR}$  (400 MHz, Acetone)  $\delta$  10.42 (s, 3H), 9.21 (d,  $J = 1.9$  Hz, 20H), 9.13 (d,  $J = 1.8$  Hz, 8H), 7.82 (d,  $J = 11.4$  Hz, 11H), 7.58 (d,  $J = 8.1$  Hz, 13H), 7.43 (dd,  $J = 14.9, 8.1$  Hz, 13H), 6.97 (td,  $J = 8.4, 2.2$  Hz, 11H); HRMS (ESI-TOF) calcd for  $\text{C}_{17}\text{H}_{17}\text{N}_3\text{O}_5$   $[\text{M} - \text{H}]^-$  304.0369, found 304.0385.

**43. (*R*)-*N*-Methyl-3, 5-dinitro-*N*-(1-phenylethyl)benzamide (11a):**

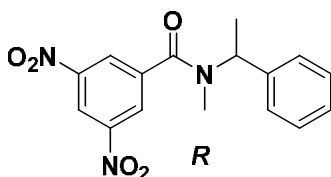

TLC (EtOAc:hexane 2:8):  $R_f = 0.35$ ; Yellow viscous liquid;  $^1\text{H NMR}$  (400 MHz,  $\text{CDCl}_3$ )  $\delta$  9.08 (d,  $J = 1.5$  Hz, 1H), 8.61 (d,  $J = 1.8$  Hz, 2H), 7.38 (dd,  $J = 22.2, 6.2$  Hz, 5H), 6.15 (s, 1H), 2.67 (s, 3H), 1.68 (d,  $J = 7.0$  Hz, 3H);  $[\alpha]_D +83.2^\circ$  ( $c$  2.5, Acetone), ee = 100%; HRMS (ESI-TOF) calcd for  $\text{C}_{17}\text{H}_{17}\text{N}_3\text{O}_5$   $[\text{M} + \text{H}]^+$  330.109, found 330.1082.

**Part B:****Pharmacokinetics studies of compounds 7a and 7d:****Discussion of *in vivo* PK for compound 7a:**

The pharmacokinetics of compound 7a was evaluated in Balb/C male mice following a single 2.5 mg/kg dose administration by intraperitoneal (IP) route and a 1 mg/kg dose by intravenous (IV) route in 5% DMSO, 5% Solutol : absolute alcohol (1:1, v/v) and 90% normal saline. Following IP administration maximum plasma concentration ( $C_{max}$ ) of 60 ng/mL was achieved at 0.5 h ( $t_{max}$ ). The terminal half life ( $t_{1/2}$ ) was 0.9 h and the area under the curve (AUC) was 148 ng\*h/mL and absolute intraperitoneal bioavailability (F%) of 49%. IV clearance was ~134 mL/min/Kg.

**Plasma concentrations (ng/mL) of compound 7a in mice after 2.5 mg/kg IP dose:**

| Animal No.                        | Body Wt. (g) | Dose Vol. (mL) | Time point (h) / concentration in plasma (ng/mL) |      |       |      |      |      |     |     |
|-----------------------------------|--------------|----------------|--------------------------------------------------|------|-------|------|------|------|-----|-----|
|                                   |              |                | 0.25                                             | 0.5  | 1     | 2    | 4    | 8    | 10  | 24  |
| 1                                 | 28           | 0.30           | 50.3                                             |      |       |      | 11.7 |      |     |     |
| 2                                 | 30           | 0.30           | 48.9                                             |      |       |      | 8.86 |      |     |     |
| 3                                 | 27           | 0.25           | 67.7                                             |      |       |      | 17.0 |      |     |     |
| 4                                 | 30           | 0.30           |                                                  | 36.7 |       |      |      | 2.94 |     |     |
| 5                                 | 27           | 0.25           |                                                  | 96.2 |       |      |      | BLQ  |     |     |
| 6                                 | 32           | 0.30           |                                                  | 49.5 |       |      |      | 1.69 |     |     |
| 7                                 | 27           | 0.25           |                                                  |      | 2.86* |      |      |      | BLQ |     |
| 8                                 | 29           | 0.30           |                                                  |      | 31.8  |      |      |      | BLQ |     |
| 9                                 | 30           | 0.30           |                                                  |      | 33.1  |      |      |      | BLQ |     |
| 10                                | 31           | 0.30           |                                                  |      |       | 32.7 |      |      |     | BLQ |
| 11                                | 29           | 0.30           |                                                  |      |       | 31.9 |      |      |     | BLQ |
| 12                                | 28           | 0.30           |                                                  |      |       | 25.1 |      |      |     | BLQ |
| <b>Mean concentration (ng/mL)</b> |              |                | 55.6                                             | 60.8 | 32.5  | 29.9 | 12.5 | 2.31 | NA  | NA  |
| <b>SD</b>                         |              |                | 10.4                                             | 31.3 | NA    | 4.20 | 4.12 | NA   | NA  | NA  |
| <b>%CV</b>                        |              |                | 18.8                                             | 51.5 | NA    | 14.0 | 33.0 | NA   | NA  | NA  |

**Plasma concentrations (ng/mL) of compound 7a in mice after 1 mg/kg IV dose:**

| Animal No.                        | Body Wt. (g) | Dose Vol. (mL) | Time point (h) / concentration in plasma (ng/mL) |      |      |      |      |      |     |     |
|-----------------------------------|--------------|----------------|--------------------------------------------------|------|------|------|------|------|-----|-----|
|                                   |              |                | 0.12                                             | 0.25 | 0.5  | 1    | 2    | 4    | 8   | 24  |
| 1                                 | 31           | 0.30           | 279                                              |      |      |      | 16.6 |      |     |     |
| 2                                 | 29           | 0.30           | 192                                              |      |      |      | 13.8 |      |     |     |
| 3                                 | 26           | 0.25           | 221                                              |      |      |      | 10.4 |      |     |     |
| 4                                 | 26           | 0.25           |                                                  | 66.8 |      |      |      | 2.62 |     |     |
| 5                                 | 30           | 0.30           |                                                  | 108  |      |      |      | 3.02 |     |     |
| 6                                 | 27           | 0.25           |                                                  | 78.6 |      |      |      | 2.25 |     |     |
| 7                                 | 29           | 0.30           |                                                  |      | 23.4 |      |      |      | BLQ |     |
| 8                                 | 25           | 0.25           |                                                  |      | 58.4 |      |      |      | BLQ |     |
| 9                                 | 29           | 0.30           |                                                  |      | 48.5 |      |      |      | BLQ |     |
| 10                                | 30           | 0.30           |                                                  |      |      | 19.3 |      |      |     | BLQ |
| 11                                | 25           | 0.25           |                                                  |      |      | 19.5 |      |      |     | BLQ |
| 12                                | 29           | 0.30           |                                                  |      |      | 33.0 |      |      |     | BLQ |
| <b>Mean concentration (ng/mL)</b> |              |                | 231                                              | 84.3 | 43.4 | 23.9 | 13.6 | 2.63 | NA  | NA  |
| <b>SD</b>                         |              |                | 44.7                                             | 21.0 | 18.0 | 7.87 | 3.09 | 0.38 | NA  | NA  |
| <b>%CV</b>                        |              |                | 19.4                                             | 24.9 | 41.5 | 32.9 | 22.7 | 14.6 | NA  | NA  |

NA: not applicable; BLQ: below limit of quantitation; \*value not considered for calculation.

| Parameter                                                                 | Unit            | Value       |
|---------------------------------------------------------------------------|-----------------|-------------|
| $t_{1/2, \beta}$                                                          | (h)             | 0.93        |
| $C_{max}$                                                                 | ng/mL(nM)       | 231(672.8)  |
| $C_0$                                                                     | ng/mL (nM)      | 316(920.3)  |
| $AUC_{0-t}$                                                               | ng·h/mL ( nM·h) | 121(352.42) |
| $AUC_{0-\infty}$                                                          | ng·h/mL ( nM·h) | 125(364.07) |
| $CL$                                                                      | (mL/min/Kg)     | 134         |
| $V_d$                                                                     | (L/Kg)          | 10.7        |
| $V_{dss}$                                                                 | (L/Kg)          | 6.67        |
| $T_{last}$                                                                | (h)             | 4.00        |
| <b>Time points considered for <math>t_{1/2, \beta}</math> calculation</b> |                 | 1 – 4 h     |
| C <sub>0</sub> calculated manually using initial 3 time points            |                 |             |

**Table 5:** Pharmacokinetic parameters of compound 7a post IV dose at 1 mg/Kg to Balbc mice.

| Parameter                                                                 | Unit           | Value        |
|---------------------------------------------------------------------------|----------------|--------------|
| $t_{1/2,\beta}$                                                           | (h)            | 1.63         |
| $AUC_{0-t}$                                                               | ng·h/mL (nM·h) | 148 (431.06) |
| $AUC_{0-\infty}$                                                          | ng·h/mL (nM·h) | 153(445.6)   |
| $C_{max}$                                                                 | ng/mL (nM)     | 60.8(177.08) |
| $t_{max}$                                                                 | (h)            | 0.50         |
| Bioavailability                                                           | (% F)          | 49           |
| <b>Time points considered for <math>t_{1/2,\beta}</math> calculation:</b> |                | 2 - 8 h      |

$t_{1/2,\beta}$ : terminal half life;  $AUC_{0-t}$ : the area under the plasma concentration-time curve from 0 to last measurable time point;  $AUC_{0-\infty}$ : area under the plasma concentration-time curve from time zero to infinity;  $C_{max}$ : maximum observed plasma concentration;  $t_{max}$ : time to the maximum observed plasma concentration; CL: clearance;  $V_d$ : volume of distribution;  $V_{dss}$ : volume of distribution at steady state.

**Table 6:** Pharmacokinetic parameters of compound **7a** post IP dose at 2.5 mg/Kg to Balbc mice.

### Time vs plasma concentration

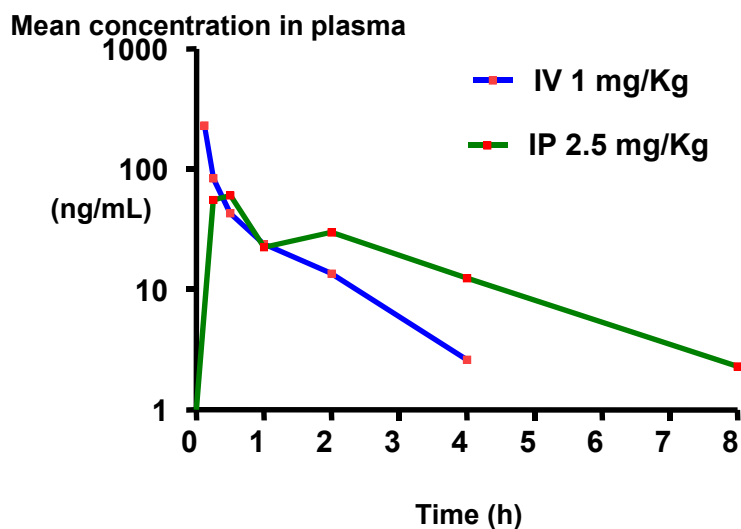

**Fig 22:** PK profile of compound **7a** in Balb mice



**Discussion of *in vivo* PK for compound 7d:**

The pharmacokinetics of compound **7d** was evaluated in Balb/C male mice following a single 2.5 mg/kg dose administration by intraperitoneal (IP) route and a 1 mg/kg dose by intravenous (IV) route in 5% DMSO, 5% Solutol : absolute alcohol (1:1, v/v) and 90% normal saline. Following IP administration maximum plasma concentration ( $C_{max}$ ) of 75 ng/mL was achieved at 0.25 h ( $t_{max}$ ). The terminal half life ( $t_{1/2}$ ) was 1.08 h and the area under the curve (AUC) was 122 ng\*h/mL and absolute intraperitoneal bioavailability (F%) of 35%. IV clearance was ~111 mL/min/Kg.

**Plasma concentrations (ng/mL) of compound 7d in mice after 2.5 mg/kg IP dose:**

| Animal No.                        | Body Wt. (g) | Dose Vol. (mL) | Time point (h) / concentration in plasma (ng/mL) |      |                   |      |      |           |     |     |
|-----------------------------------|--------------|----------------|--------------------------------------------------|------|-------------------|------|------|-----------|-----|-----|
|                                   |              |                | 0.25                                             | 0.5  | 1                 | 2    | 4    | 8         | 10  | 24  |
| 1                                 | 21           | 0.20           | 94.0                                             |      |                   |      | BLQ  |           |     |     |
| 2                                 | 22           | 0.20           | 78.0                                             |      |                   |      | 8.35 |           |     |     |
| 3                                 | 24           | 0.25           | 53.6                                             |      |                   |      | 6.38 |           |     |     |
| 4                                 | 21           | 0.20           |                                                  | 60.5 |                   |      |      | BLQ       |     |     |
| 5                                 | 23           | 0.25           |                                                  | 44.8 |                   |      |      | BLQ       |     |     |
| 6                                 | 25           | 0.25           |                                                  | 52.5 |                   |      |      | 2.26<br>* |     |     |
| 7                                 | 26           | 0.25           |                                                  |      | 36.9              |      |      |           | BLQ |     |
| 8                                 | 24           | 0.25           |                                                  |      | 65.4              |      |      |           | BLQ |     |
| 9                                 | 23           | 0.25           |                                                  |      | 65.2 <sup>#</sup> |      |      |           | BLQ |     |
| 10                                | 24           | 0.25           |                                                  |      |                   | 19.1 |      |           |     | BLQ |
| 11                                | 25           | 0.25           |                                                  |      |                   | 27.2 |      |           |     | BLQ |
| 12                                | 27           | 0.25           |                                                  |      |                   | 28.8 |      |           |     | BLQ |
| <b>Mean concentration (ng/mL)</b> |              |                | 75.2                                             | 52.6 | 51.1              | 25.0 | 7.36 | NA        | NA  | NA  |
| <b>SD</b>                         |              |                | 20.4                                             | 7.85 | NA                | 5.23 | NA   | NA        | NA  | NA  |
| <b>%CV</b>                        |              |                | 27.1                                             | 14.9 | NA                | 20.9 | NA   | NA        | NA  | NA  |

**Plasma concentrations (ng/mL) of compound 7d in mice after 1 mg/kg IV dose:**

| Animal No.                        | Body Wt. (g) | Dose Vol. (mL) | Time point (h) / concentration in plasma (ng/mL) |      |      |      |      |                   |     |     |
|-----------------------------------|--------------|----------------|--------------------------------------------------|------|------|------|------|-------------------|-----|-----|
|                                   |              |                | 0.12                                             | 0.25 | 0.5  | 1    | 2    | 4                 | 8   | 24  |
| 1                                 | 27           | 0.25           | 313                                              |      |      |      |      | 21.3              |     |     |
| 2                                 | 28           | 0.30           | 177                                              |      |      |      |      | 10.6              |     |     |
| 3                                 | 30           | 0.30           | 252                                              |      |      |      |      | 6.44 <sup>#</sup> |     |     |
| 4                                 | 27           | 0.25           |                                                  | 166  |      |      |      |                   | BLQ |     |
| 5                                 | 26           | 0.25           |                                                  | 137  |      |      |      |                   | BLQ |     |
| 6                                 | 27           | 0.25           |                                                  | 103  |      |      |      |                   | BLQ |     |
| 7                                 | 27           | 0.25           |                                                  |      | 52.7 |      |      |                   |     | BLQ |
| 8                                 | 26           | 0.25           |                                                  |      | 55.9 |      |      |                   |     | BLQ |
| 9                                 | 30           | 0.30           |                                                  |      | 50.2 |      |      |                   |     | BLQ |
| 10                                | 26           | 0.25           |                                                  |      |      | 35.6 |      |                   |     | BLQ |
| 11                                | 30           | 0.30           |                                                  |      |      | 25.8 |      |                   |     | BLQ |
| 12                                | 32           | 0.30           |                                                  |      |      | 28.2 |      |                   |     | BLQ |
| <b>Mean concentration (ng/mL)</b> |              |                | 247                                              | 135  | 53.0 | 29.9 | 16.0 | NA                | NA  | NA  |
| <b>SD</b>                         |              |                | 68.2                                             | 31.2 | 2.88 | 5.11 | NA   | NA                | NA  | NA  |
| <b>%CV</b>                        |              |                | 27.6                                             | 23.1 | 5.43 | 17.1 | NA   | NA                | NA  | NA  |

NA: not applicable; BLQ: below limit of quantitation; \*value not considered for calculation; <sup>#</sup> due to IS variation value was not considered for calculation.

| Parameter                                                        | Unit            | Value       |
|------------------------------------------------------------------|-----------------|-------------|
| <b>t<sub>1/2, β</sub></b>                                        | (h)             | 0.90        |
| <b>C<sub>max</sub></b>                                           | ng/mL (nM)      | 247(711.1)  |
| <b>C<sub>0</sub></b>                                             | ng/mL (nM)      | 388(1117.1) |
| <b>AUC<sub>0-t</sub></b>                                         | ng·h/mL ( nM·h) | 130(374.31) |
| <b>AUC<sub>0-∞</sub></b>                                         | ng·h/mL ( nM·h) | 151(434.78) |
| <b>CL</b>                                                        | (mL/min/Kg)     | 111         |
| <b>V<sub>d</sub></b>                                             | (L/Kg)          | 8.57        |
| <b>V<sub>dss</sub></b>                                           | (L/Kg)          | 5.57        |
| <b>T<sub>last</sub></b>                                          | (h)             | 2.00        |
| <b>Time points considered for t<sub>1/2, β</sub> calculation</b> |                 | 0.5 – 2 h   |
| C <sub>0</sub> calculated manually using initial 3 time points   |                 |             |

**Table 7:** Pharmacokinetic parameters of compound 7d post IV dose at 1 mg/Kg to Balbc mice:

| Parameter                                                                 | Unit           | Value       |
|---------------------------------------------------------------------------|----------------|-------------|
| $t_{1/2,\beta}$                                                           | (h)            | 1.08        |
| $AUC_{0-t}$                                                               | ng·h/mL (nM·h) | 122(351.27) |
| $AUC_{0-\infty}$                                                          | ng·h/mL (nM·h) | 133(382.95) |
| $C_{max}$                                                                 | ng/mL (nM)     | 75.2(216.5) |
| $t_{max}$                                                                 | (h)            | 0.25        |
| Bioavailability                                                           | (% F)          | 35          |
| <b>Time points considered for <math>t_{1/2,\beta}</math> calculation:</b> |                | 1 - 4 h     |

$t_{1/2,\beta}$ : terminal half life;  $AUC_{0-t}$ : the area under the plasma concentration-time curve from 0 to last measurable time point;  $AUC_{0-\infty}$ : area under the plasma concentration-time curve from time zero to infinity;  $C_{max}$ : maximum observed plasma concentration;  $t_{max}$ : time to the maximum observed plasma concentration; CL: clearance;  $V_d$ : volume of distribution;  $V_{dss}$ : volume of distribution at steady state.

**Table 8:** Pharmacokinetic parameters of compound **7d** post IP dose at 2.5 mg/Kg to Balbc mice:

### Time vs plasma concentration

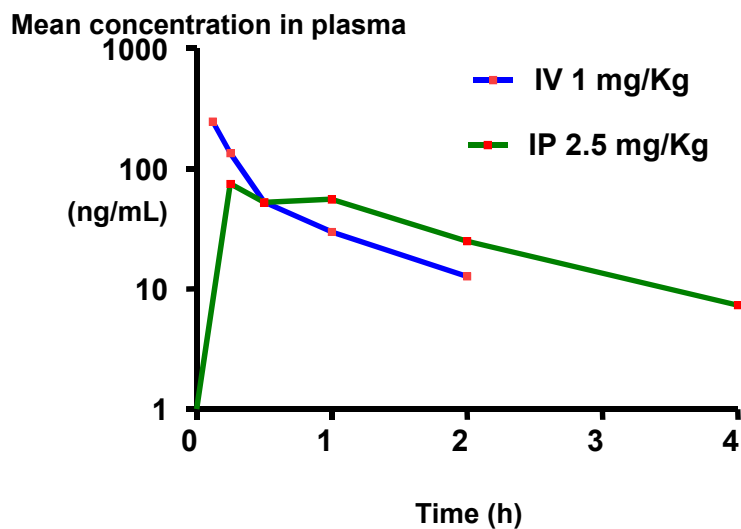

**Fig 23:** PK profile of compound **7d** in Balb mice

## Part E: Spectral data of synthesized DNB derivatives

$^1\text{H}$  NMR (400 MHz,  $\text{CDCl}_3$ ) of compound **4b**:

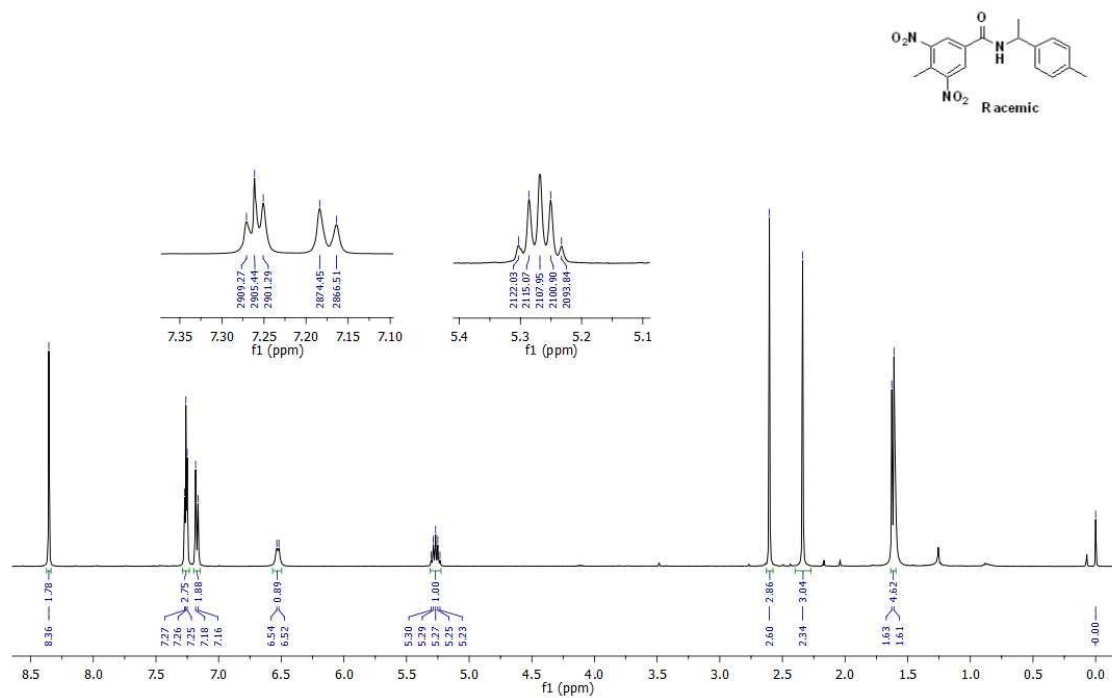

$^{13}\text{C}$  NMR (101 MHz,  $\text{Acetone-d}_6$ ) of compound **4b**:

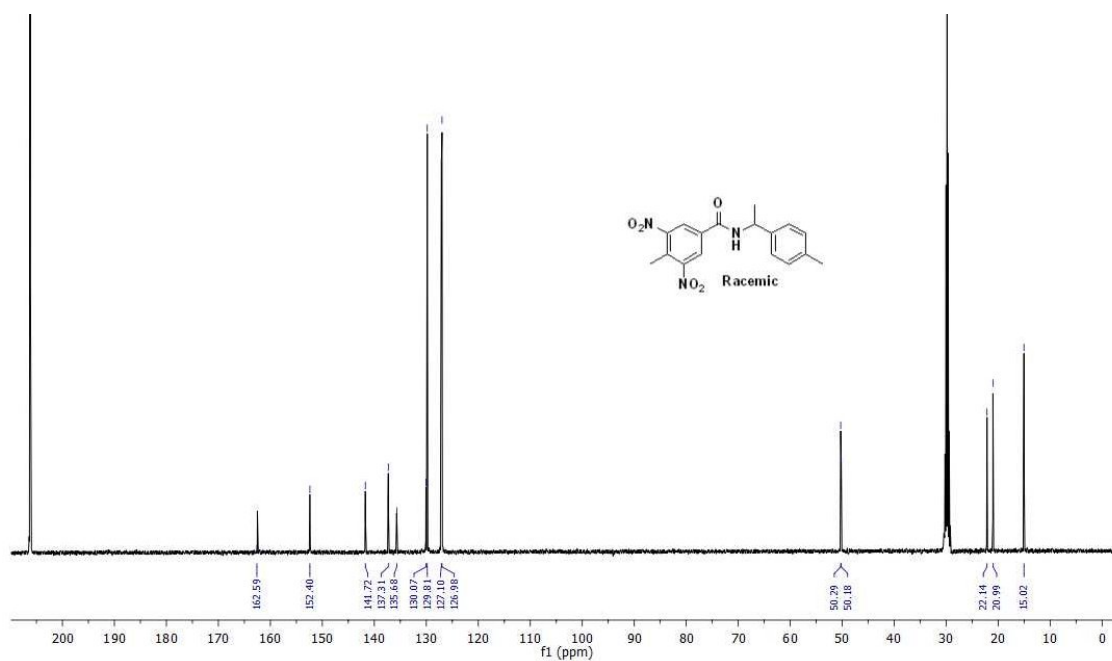

DEPT (101 MHz, Acetone-d<sub>6</sub>) of compound **4b**:

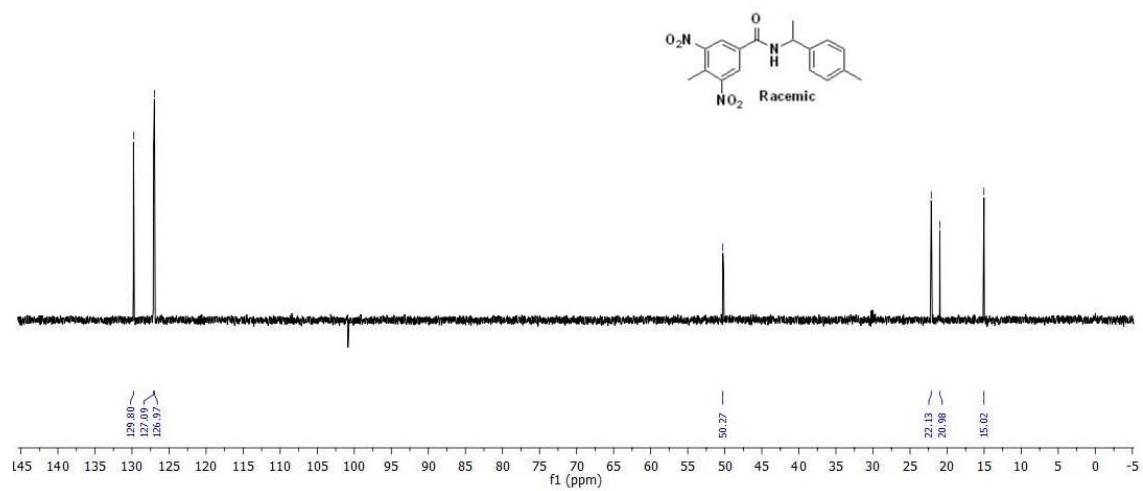

<sup>1</sup>H NMR (400 MHz, CDCl<sub>3</sub>) of compound **7a**:

July13-2012-purnima  
MEDNB-FLORO-R

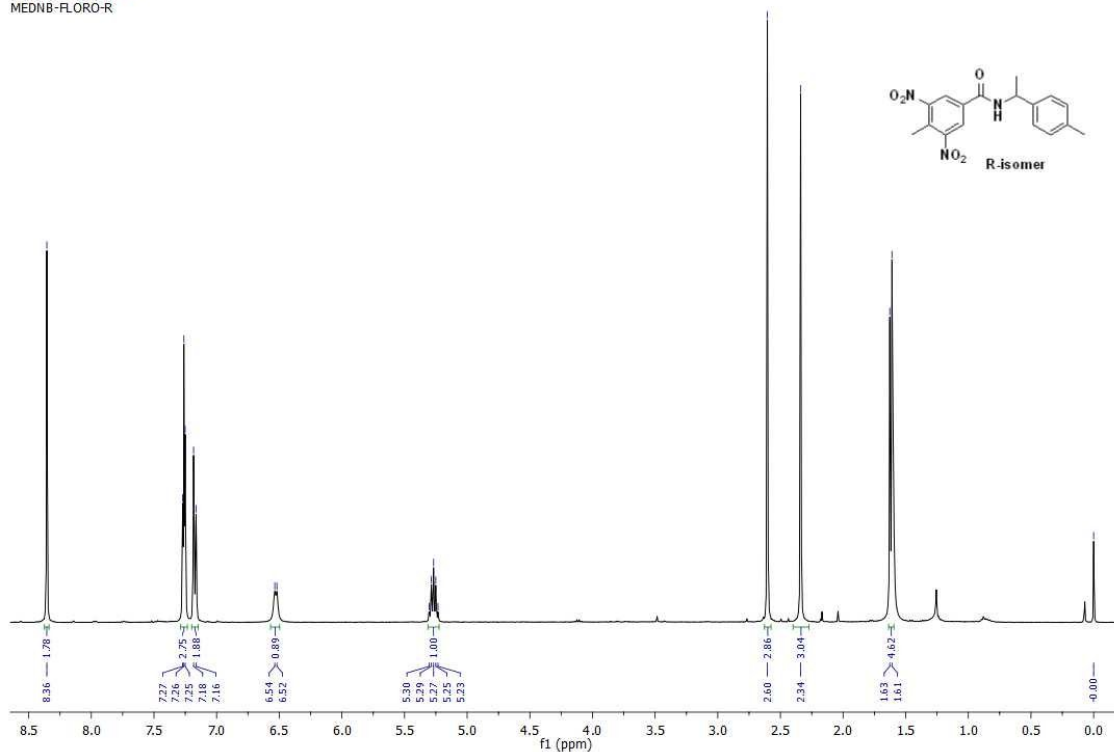

<sup>13</sup>C NMR (101 MHz, Acetone-d<sub>6</sub>) of compound **7a**:

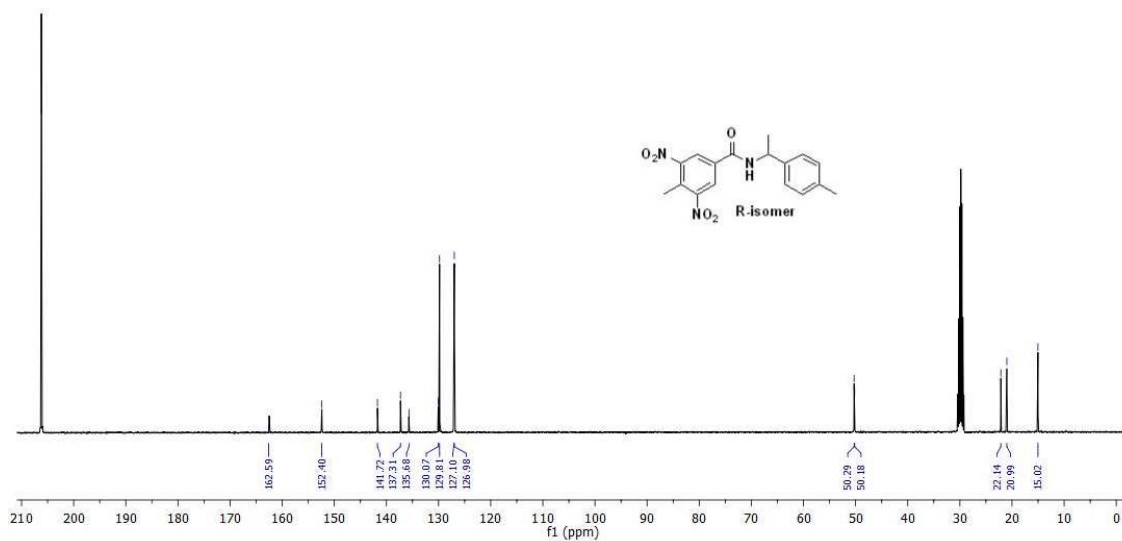

DEPT (101 MHz, Acetone-d<sub>6</sub>) of compound **7a**:

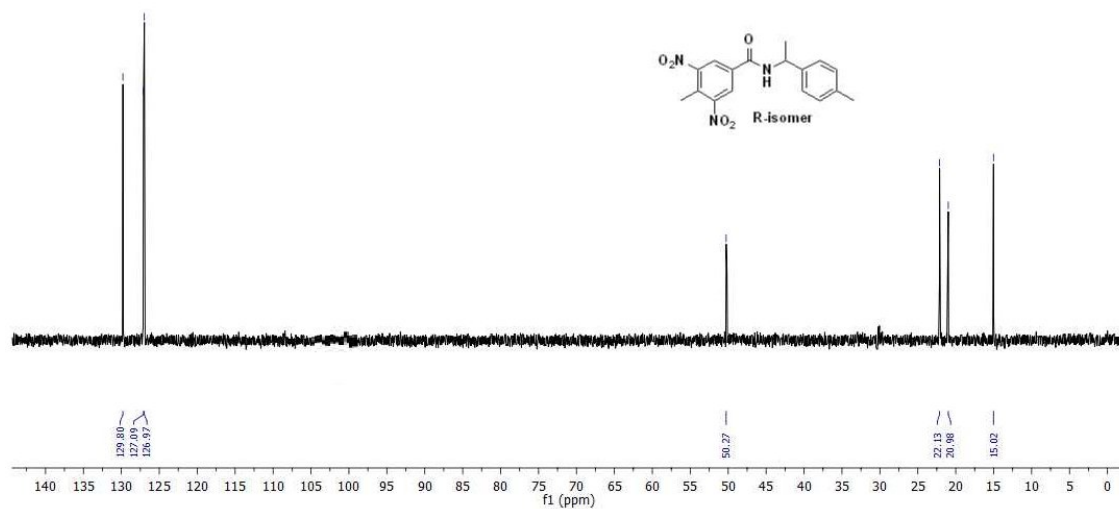

HRMS (ESI-TOF) of compound **7a**:

**Qualitative Compound Report**

|                               |                           |                      |                          |
|-------------------------------|---------------------------|----------------------|--------------------------|
| <b>Data File</b>              | 84.d                      | <b>Sample Name</b>   | 84                       |
| <b>Sample Type</b>            | Sample                    | <b>Position</b>      | Vial 38                  |
| <b>Instrument Name</b>        | Instrument 1              | <b>User Name</b>     |                          |
| <b>Acq Method</b>             | vishal_MS_Negative_mode.m | <b>Acquired Time</b> | 28-07-2012 PM 03:14:11   |
| <b>IRM Calibration Status</b> | Some Ions Missed          | <b>DA Method</b>     | Vishal_Compound_report.m |
| <b>Comment</b>                |                           |                      |                          |
| <b>Sample Group</b>           | Info.                     |                      |                          |

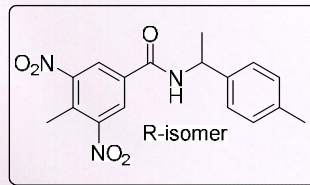

**Compound Table**

| Compound Label       | RT    | Mass     | Formula       | MFG Formula   | MFG Diff (ppm) | DB Formula    |
|----------------------|-------|----------|---------------|---------------|----------------|---------------|
| Cpd 1: C17 H17 N3 O5 | 0.213 | 343.1167 | C17 H17 N3 O5 | C17 H17 N3 O5 | 0.21           | C17 H17 N3 O5 |

| Compound Label       | m/z      | RT    | Algorithm                 | Mass     |
|----------------------|----------|-------|---------------------------|----------|
| Cpd 1: C17 H17 N3 O5 | 342.1095 | 0.213 | Find by Molecular Feature | 343.1167 |

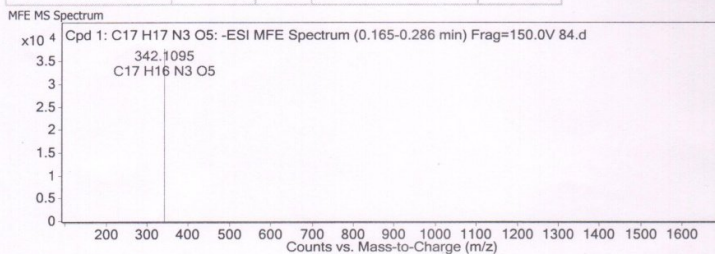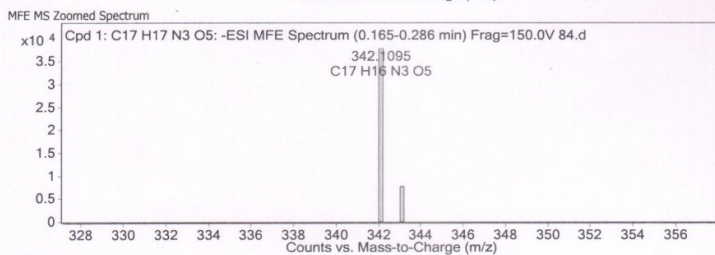

**MS Spectrum Peak List**

| m/z      | z  | Abund   | Formula       | Ion                |
|----------|----|---------|---------------|--------------------|
| 342.1095 | -1 | 37748.9 | C17 H16 N3 O5 | (M-H) <sup>-</sup> |
| 343.1128 | -1 | 7585.8  | C17 H16 N3 O5 | (M-H) <sup>-</sup> |

--- End Of Report ---



$^1\text{H}$  NMR (400 MHz,  $\text{CDCl}_3$ ) of compound **7b**:

July13-2012-purnima  
DNB-STAND-S

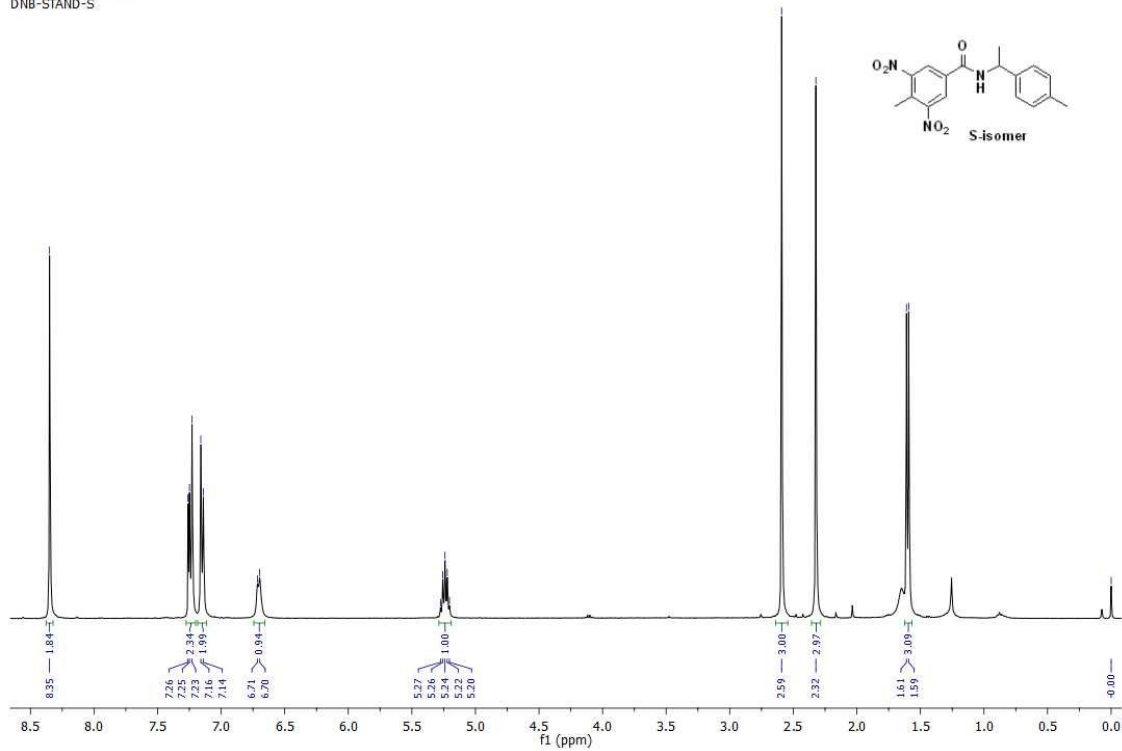

$^{13}\text{C}$  NMR (101 MHz,  $\text{Acetone-d}_6$ ) of compound **7b**:

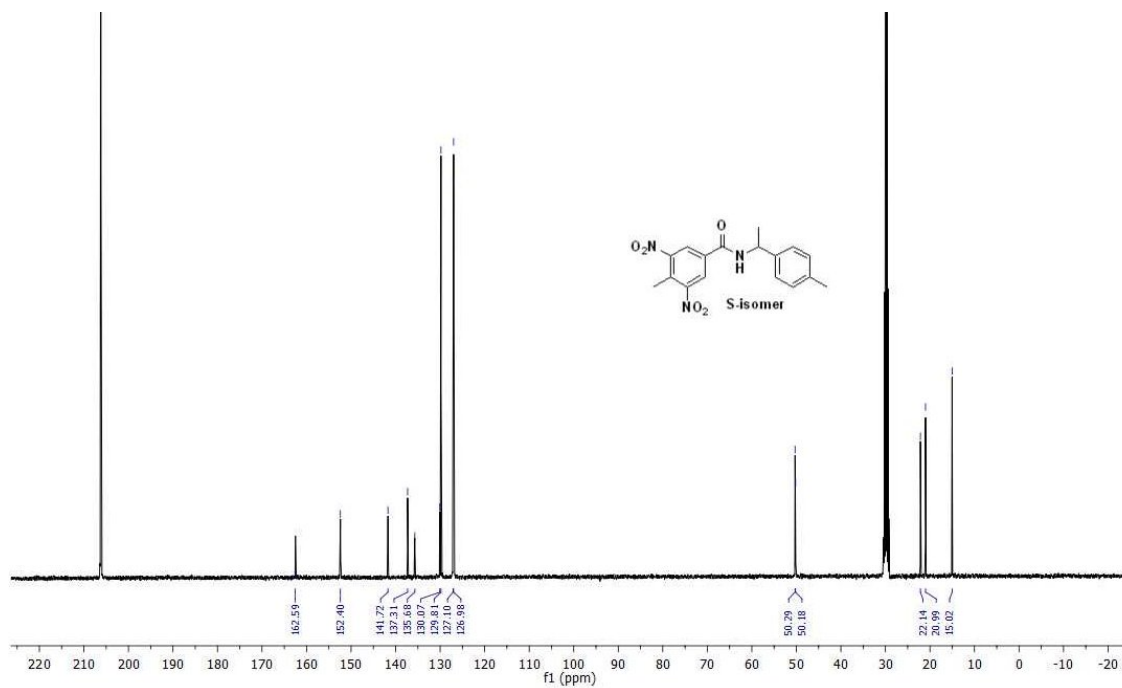

DEPT (101 MHz, Acetone-d<sub>6</sub>) of compound **7b**:

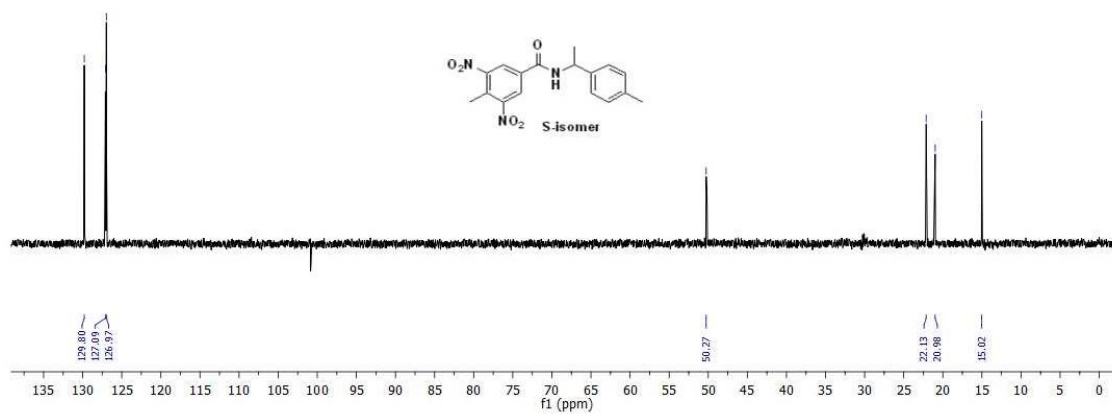

HRMS (ESI-TOF) of compound **7b**:

### Qualitative Compound Report

|                               |                           |                      |                          |
|-------------------------------|---------------------------|----------------------|--------------------------|
| <b>Data File</b>              | 85.d                      | <b>Sample Name</b>   | 85                       |
| <b>Sample Type</b>            | Sample                    | <b>Position</b>      | Vial 39                  |
| <b>Instrument Name</b>        | Instrument 1              | <b>User Name</b>     |                          |
| <b>Acq Method</b>             | vishal_MS_Negative_mode.m | <b>Acquired Time</b> | 27-07-2012 PM 05:31:43   |
| <b>IRM Calibration Status</b> | Success                   | <b>DA Method</b>     | Vishal_Compound_report.m |
| <b>Comment</b>                |                           |                      |                          |
| <b>Sample Group</b>           | <b>Info.</b>              |                      |                          |

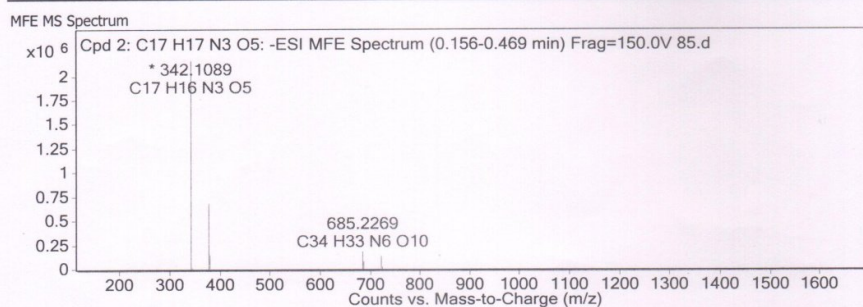

**MS Spectrum Peak List**

| m/z      | z  | Abund     | Formula          | Ion      |
|----------|----|-----------|------------------|----------|
| 342.1089 | -1 | 2162089.8 | C17 H16 N3 O5    | (M-H)-   |
| 343.1123 | -1 | 310561.9  | C17 H16 N3 O5    | (M-H)-   |
| 378.0856 | -1 | 678649.6  | C17 H17 Cl N3 O5 | (M+Cl)-  |
| 379.0897 | -1 | 90943.6   | C17 H17 Cl N3 O5 | (M+Cl)-  |
| 380.0846 | -1 | 142890    | C17 H17 Cl N3 O5 | (M+Cl)-  |
| 685.2269 | -1 | 173803.8  | C34 H33 N6 O10   | (2M-H)-  |
| 686.2295 | -1 | 78339.4   | C34 H33 N6 O10   | (2M-H)-  |
| 721.2034 | -1 | 139284.7  |                  | (2M+Cl)- |
| 722.2062 | -1 | 64958.9   |                  | (2M+Cl)- |
| 723.2023 | -1 | 58238.7   |                  | (2M+Cl)- |

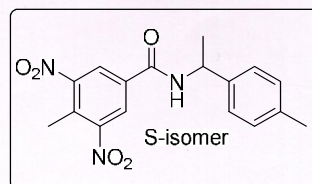

--- End Of Report ---

$^1\text{H}$  NMR (400 MHz,  $\text{CDCl}_3$ ) of compound **7c**:

July13-2012-purnima  
MEDNB-FLORO-R

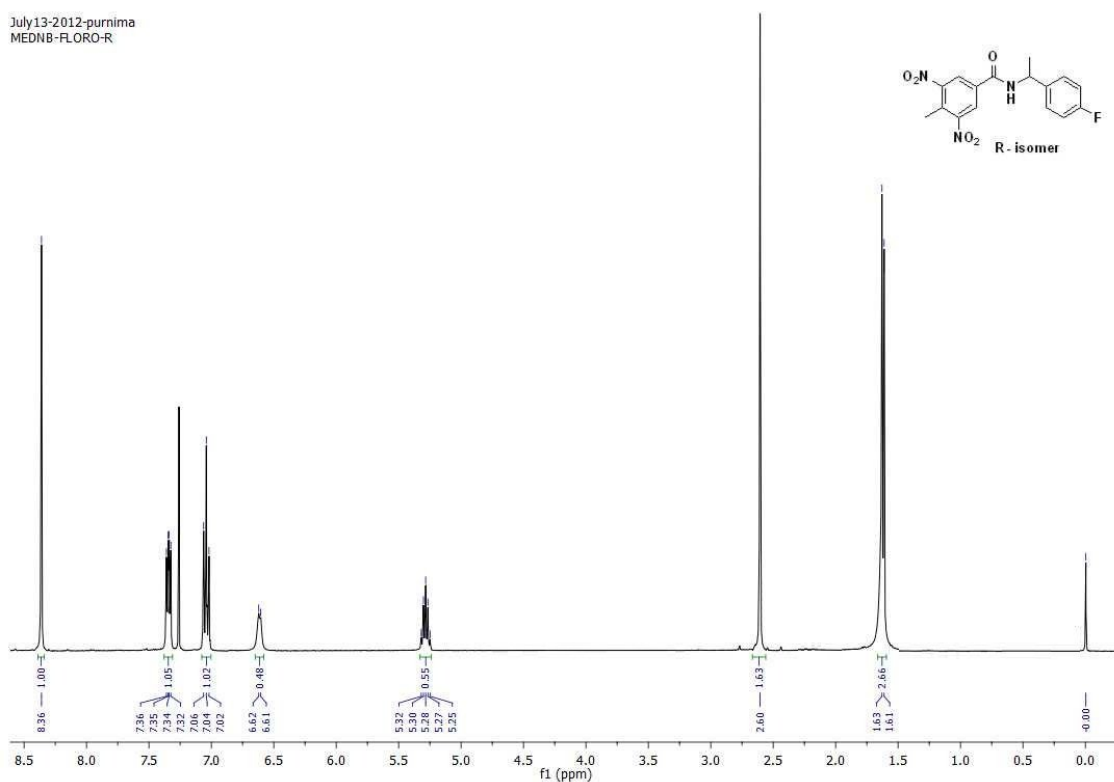

$^{13}\text{C}$  NMR (126 MHz,  $\text{Acetone-d}_6$ ) of compound **7c**:

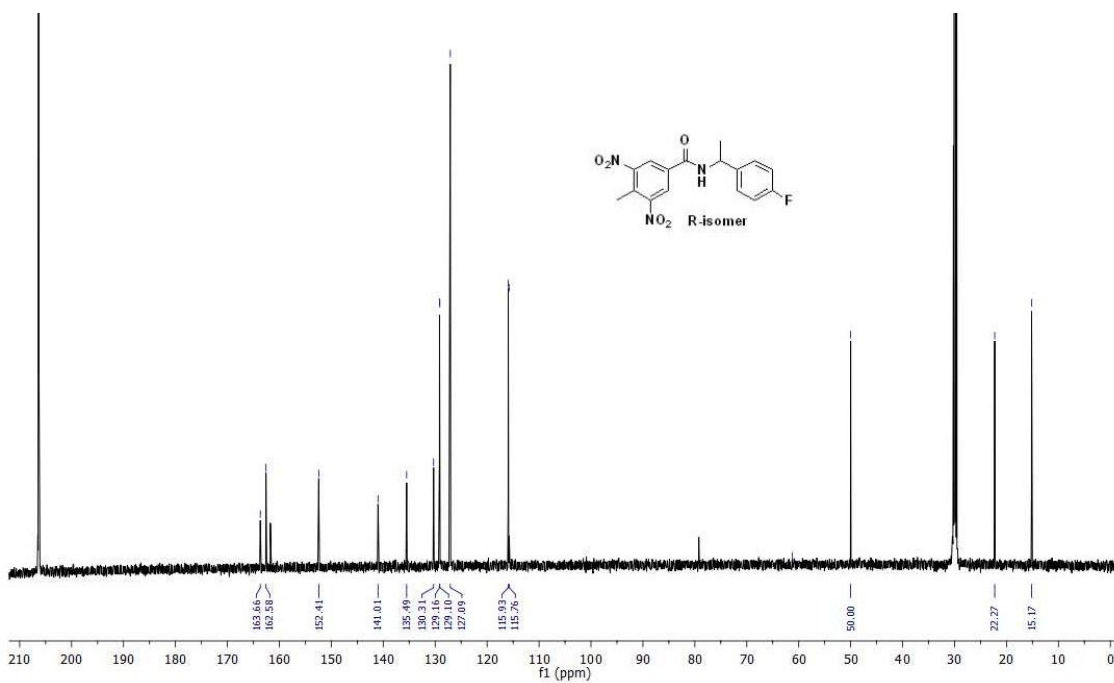

DEPT (126 MHz, Acetone-d<sub>6</sub>) of compound **7c**:

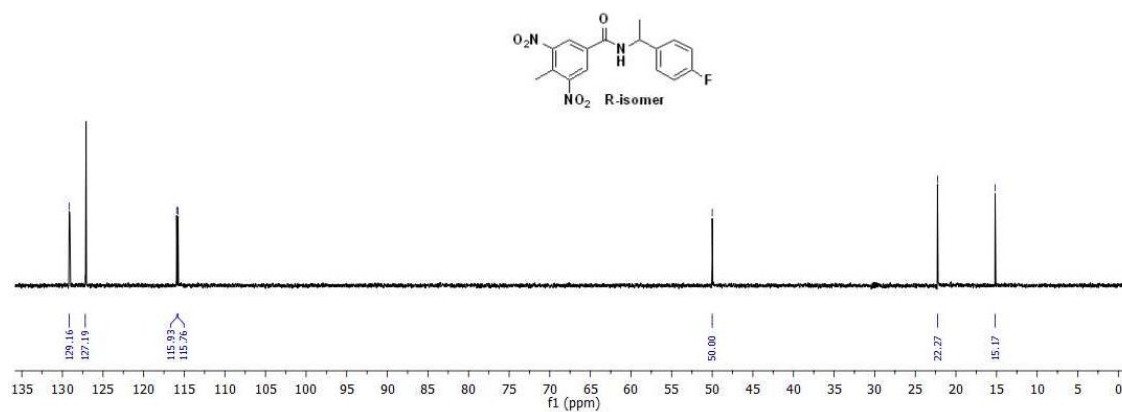

HRMS (ESI-TOF) of compound **7c**:

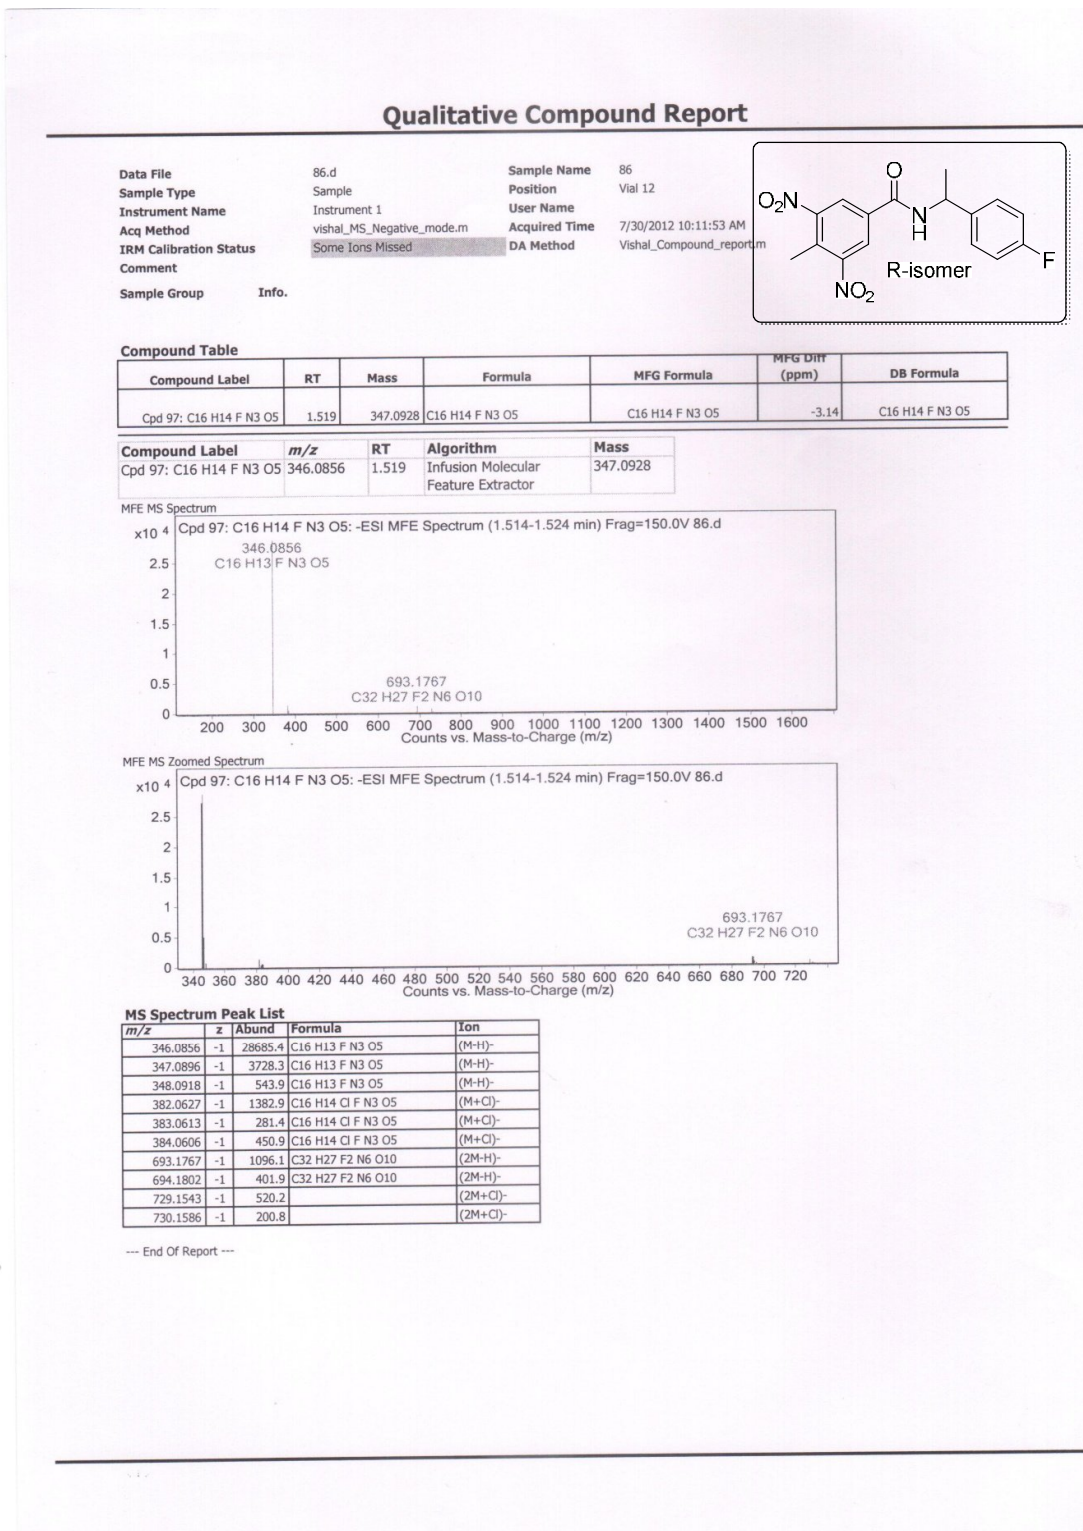

$^1\text{H}$  NMR (400 MHz,  $\text{CDCl}_3$ ) of compound **7d**:

July13-2012-purnima  
MEDNB-F-S

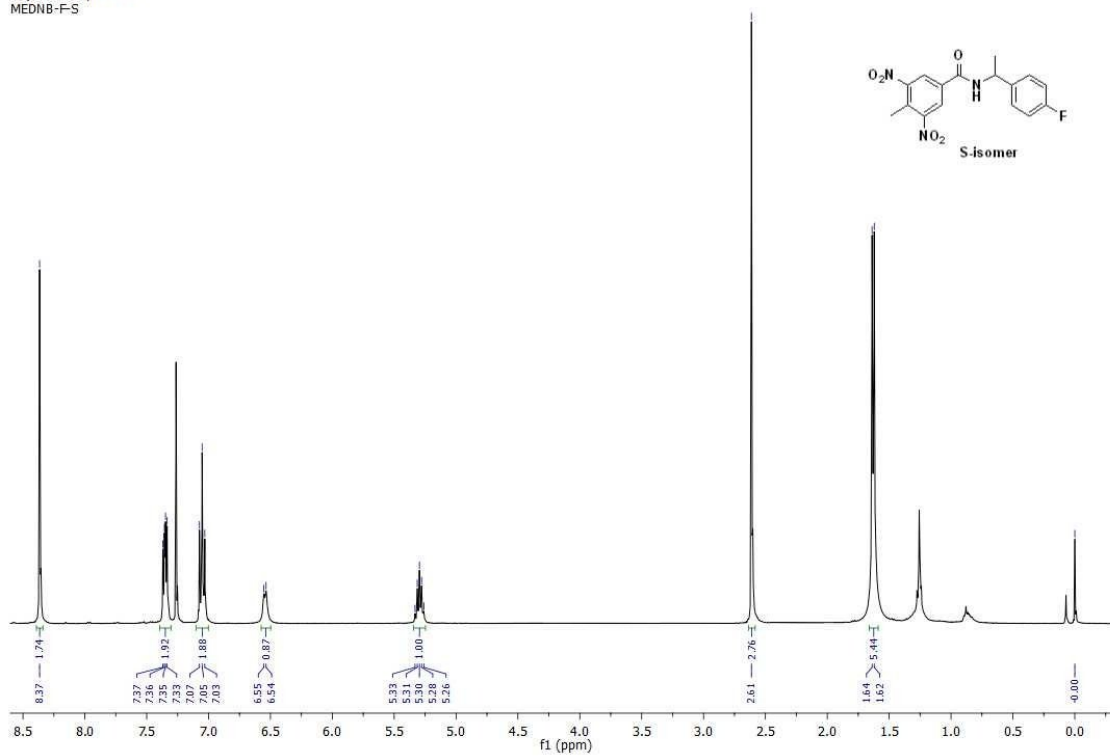

$^{13}\text{C}$  NMR (126 MHz,  $\text{Acetone-d}_6$ ) of compound **7d**:

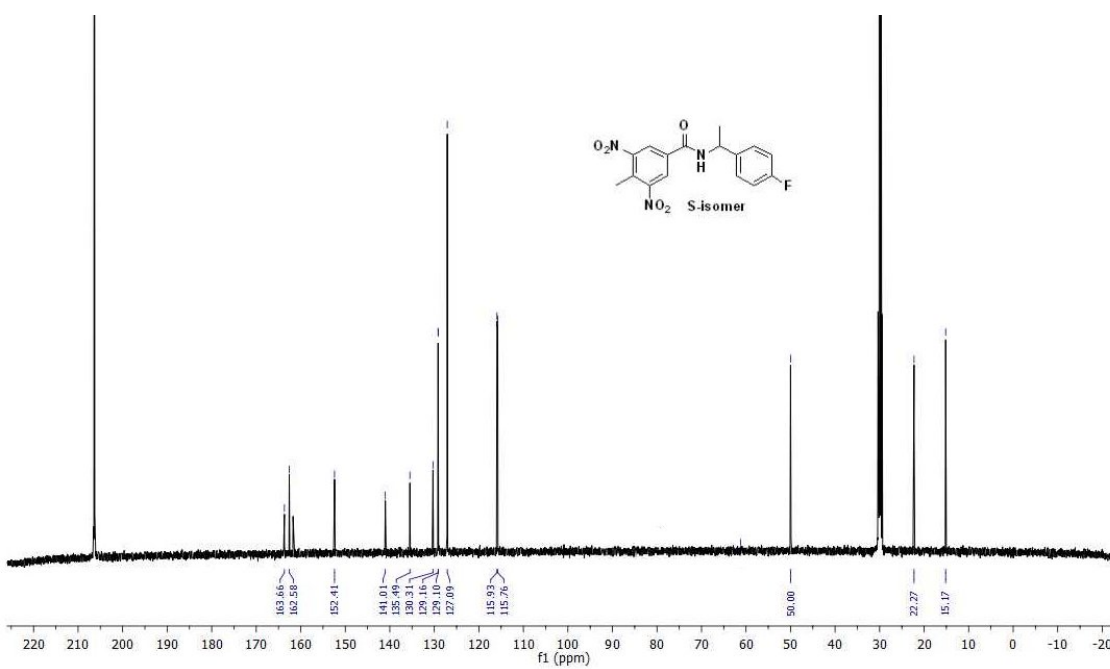

DEPT (126 MHz, Acetone-d<sub>6</sub>) of compound **7d**:

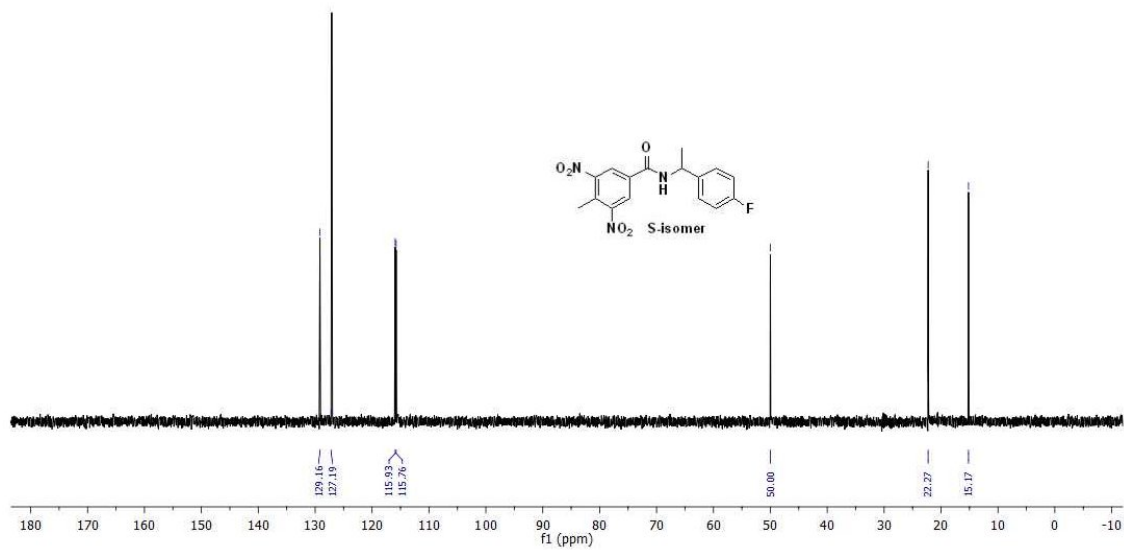



HRMS (ESI-TOF) of compound **7d**:

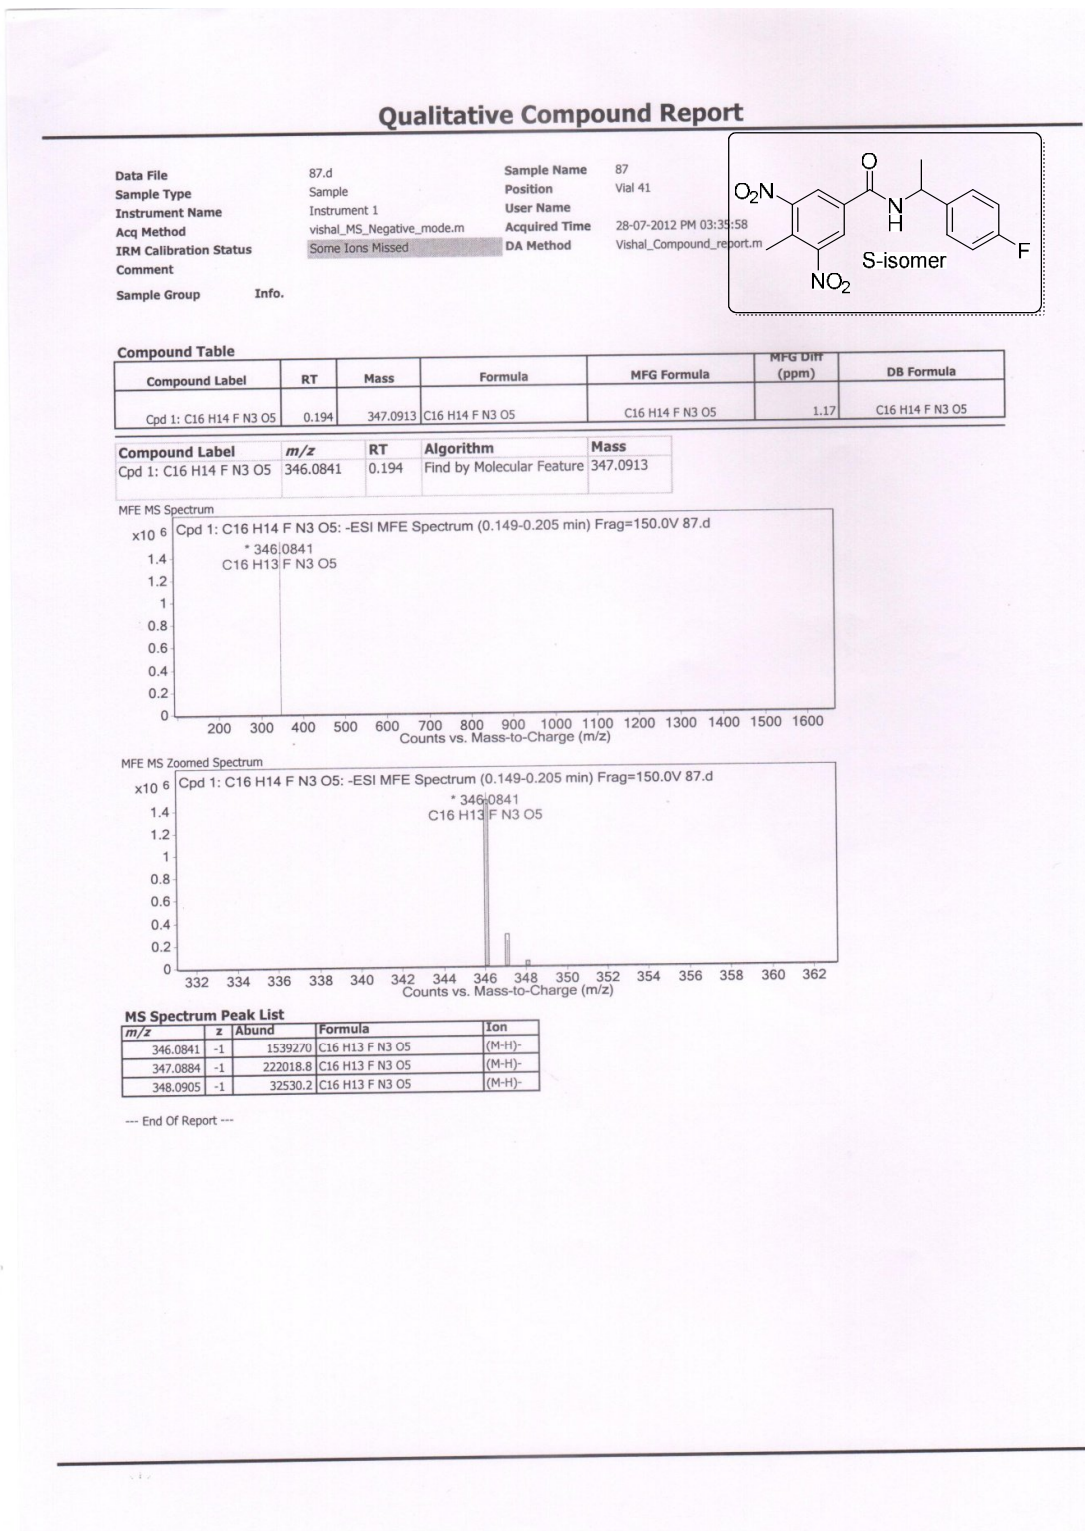

$^1\text{H}$  NMR (400 MHz,  $\text{CDCl}_3$ ) of compound **7e**:

July23-2012-purnima

CL-ME-R

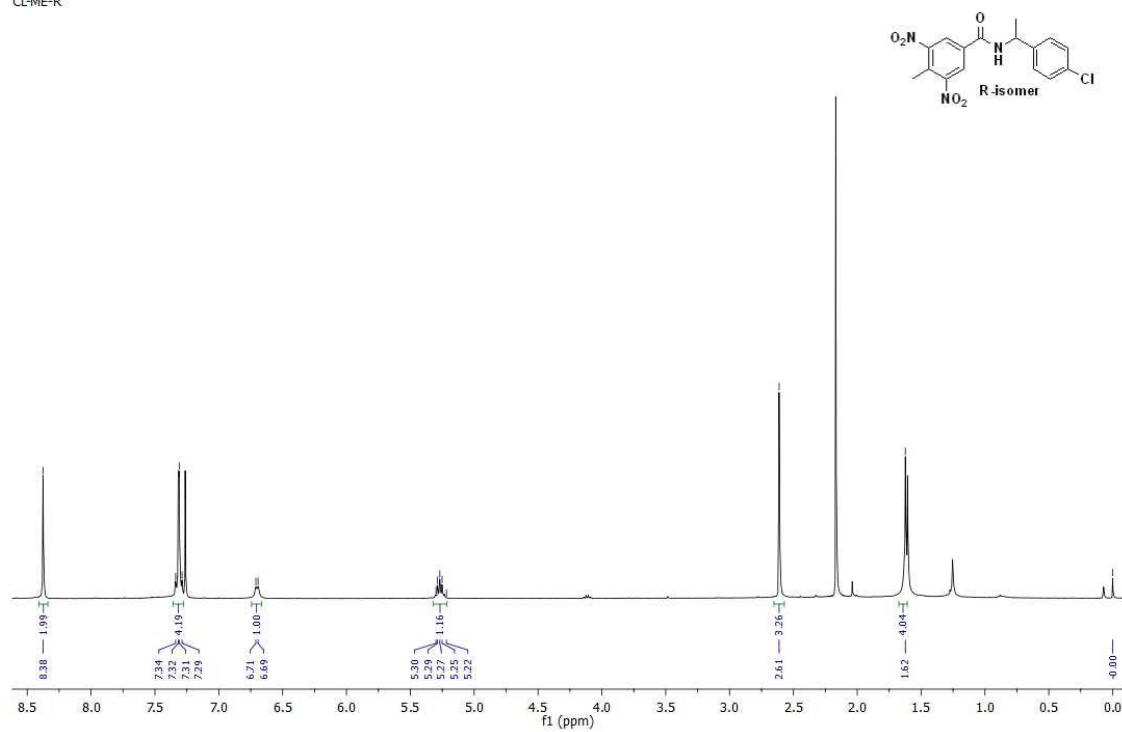

$^{13}\text{C}$  NMR (101 MHz,  $\text{Acetone-d}_6$ ) of compound **7e**:

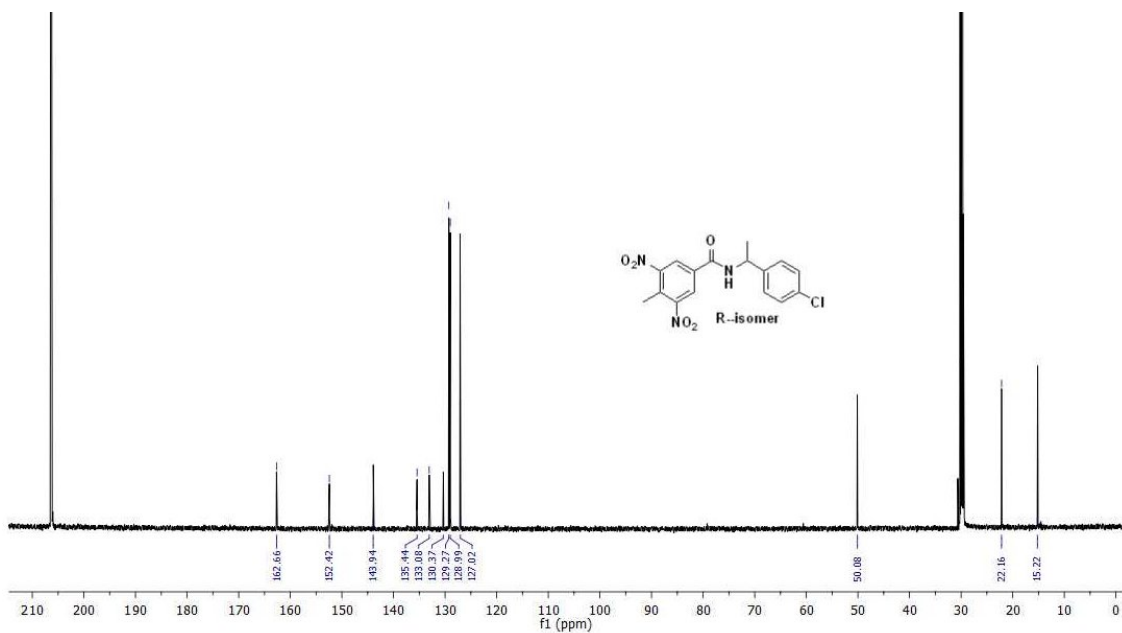

DEPT (101 MHz, Acetone-d<sub>6</sub>) of compound **7e**:

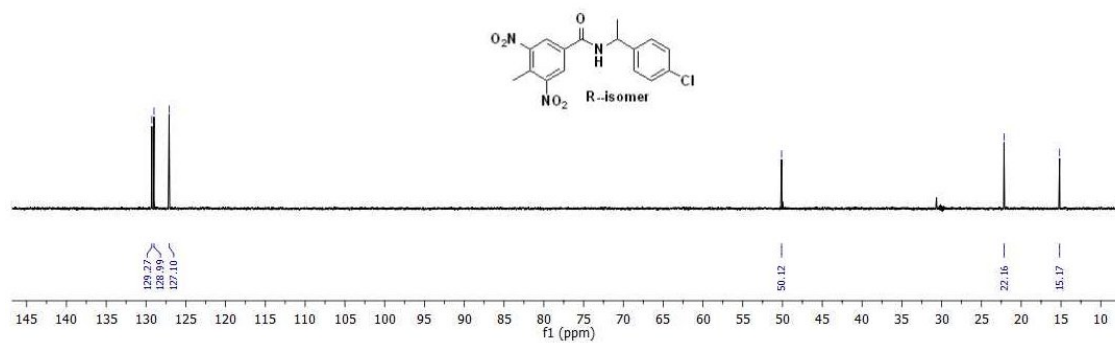

HRMS (ESI-TOF) of compound **7c**:

Qualitative Compound Report

Data File: 106.d Sample Name: 107  
 Sample Type: Sample Position: Vial 34  
 Instrument Name: Instrument 1 User Name:  
 Acq Method: vishal\_neg12-01-13.m Acquired Time: 07-03-2013 PM 6:05:43  
 IRM Calibration Status: Success DA Method: SamplePurity-Default.m  
 Comment:

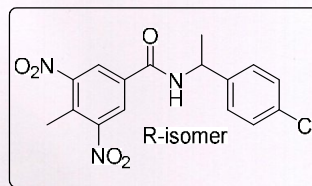

Sample Group: Info.  
 Acquisition SW: 6200 series TOF/6500 series  
 Version: Q-TOF B.05.01 (B5125)

Compound Table

| Compound Label           | RT    | Mass     | Formula          | MFG Formula      | MFG Diff (ppm) | DB Formula       |
|--------------------------|-------|----------|------------------|------------------|----------------|------------------|
| Cpd 18: C16 H14 Cl N3 O5 | 0.187 | 363.0627 | C16 H14 Cl N3 O5 | C16 H14 Cl N3 O5 | -1.25          | C16 H14 Cl N3 O5 |

| Compound Label           | m/z      | RT    | Algorithm                 | Mass     |
|--------------------------|----------|-------|---------------------------|----------|
| Cpd 18: C16 H14 Cl N3 O5 | 362.0555 | 0.187 | Find by Molecular Feature | 363.0627 |

MFE MS Spectrum

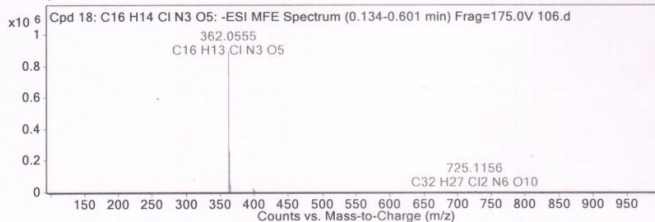

MS Spectrum Peak List

| m/z      | z  | Abund     | Formula            | Ion     |
|----------|----|-----------|--------------------|---------|
| 362.0555 | -1 | 888825.13 | C16 H13 Cl N3 O5   | (M-H)-  |
| 363.0584 | -1 | 146993.73 | C16 H13 Cl N3 O5   | (M-H)-  |
| 364.0529 | -1 | 260138.05 | C16 H13 Cl N3 O5   | (M-H)-  |
| 365.0556 | -1 | 45648.43  | C16 H13 Cl N3 O5   | (M-H)-  |
| 366.0582 | -1 | 6131.97   | C16 H13 Cl N3 O5   | (M-H)-  |
| 398.0315 | -1 | 24369.5   | C16 H14 Cl2 N3 O5  | (M+Cl)- |
| 399.0341 | -1 | 4515.21   | C16 H14 Cl2 N3 O5  | (M+Cl)- |
| 400.029  | -1 | 17215.26  | C16 H14 Cl2 N3 O5  | (M+Cl)- |
| 725.1156 | -1 | 6860.29   | C32 H27 Cl2 N6 O10 | (2M-H)- |
| 727.1155 | -1 | 5726.6    | C32 H27 Cl2 N6 O10 | (2M-H)- |

Predicted Isotope Match Table

| Isotope | m/z      | Calc m/z | Diff (ppm) | Abund % | Calc Abund % | Abund Sum % | Calc Abund Sum % |
|---------|----------|----------|------------|---------|--------------|-------------|------------------|
| 1       | 362.0555 | 362.0549 | -1.46      | 100     | 100          | 65.92       | 62.23            |
| 2       | 363.0584 | 363.0579 | -1.13      | 16.54   | 18.74        | 10.9        | 11.66            |
| 3       | 364.0529 | 364.0526 | -0.67      | 29.27   | 34.68        | 19.29       | 21.59            |
| 4       | 365.0556 | 365.0553 | -0.71      | 5.14    | 6.28         | 3.39        | 3.91             |
| 5       | 366.0582 | 366.0575 | -1.76      | 0.69    | 0.88         | 0.45        | 0.55             |
| 6       | 367.0594 | 367.0599 | 1.41       | 0.08    | 0.09         | 0.05        | 0.06             |

--- End Of Report ---

$^1\text{H}$  NMR (400 MHz,  $\text{CDCl}_3$ ) of compound **7f**:

July25-2012-purnima  
cl-me-dnb-s

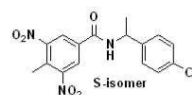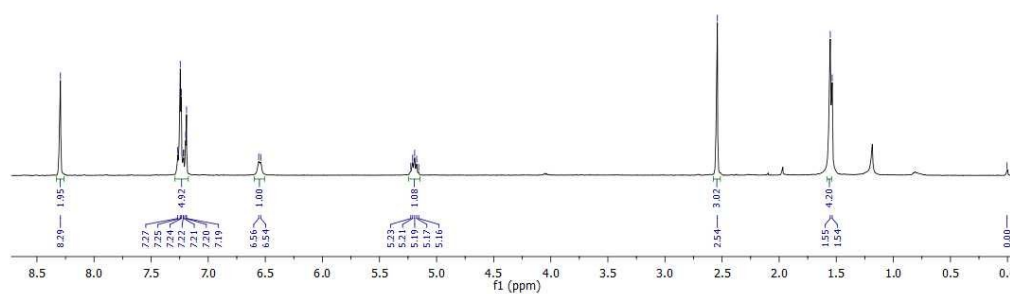

$^{13}\text{C}$  NMR (101 MHz,  $\text{Acetone-d}_6$ ) of compound **7f**:

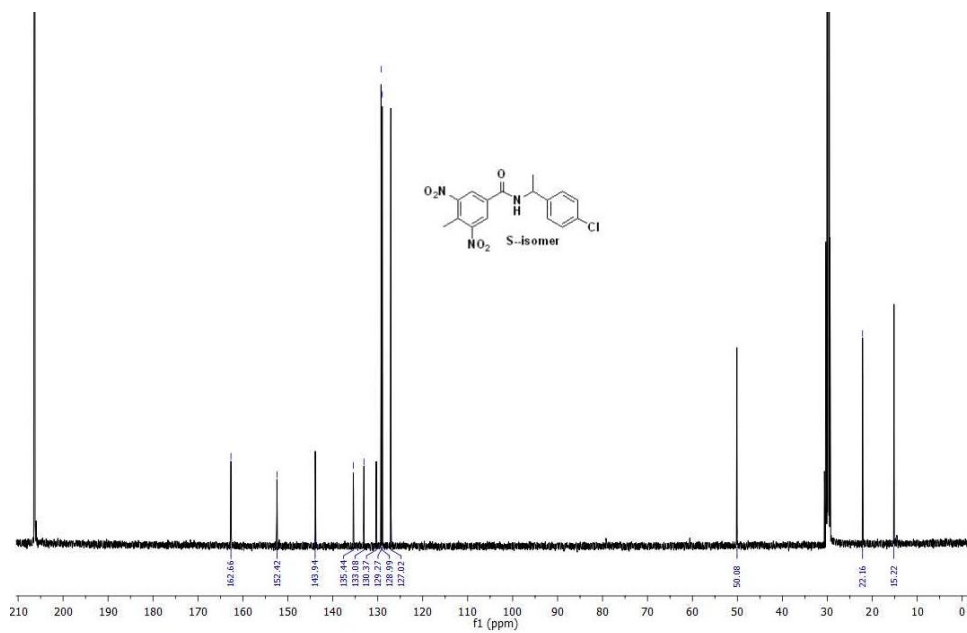

DEPT (101 MHz, Acetone-d<sub>6</sub>) of compound **7f**:

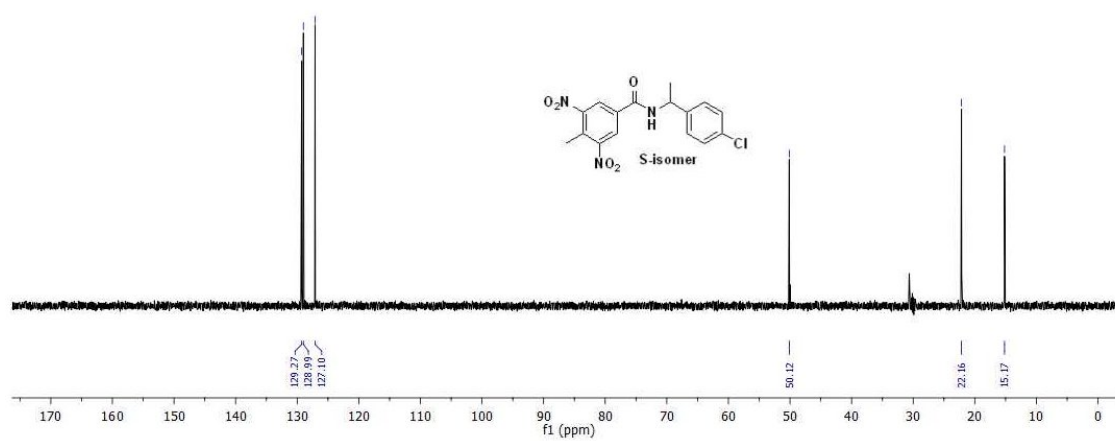

HRMS (ESI-TOF) of compound 7f:

Qualitative Compound Report

Data File 107.d Sample Name 107  
 Sample Type Sample Position Vial 34  
 Instrument Name Instrument 1 User Name  
 Acq Method vishal\_neg12-01-13.m Acquired Time 07-03-2013 PM 6:05:43  
 IRM Calibration Status Success DA Method SamplePurity-Default.m  
 Comment  
 Sample Group Info.  
 Acquisition SW 6200 series TOF/6500 series  
 Version Q-TOF B.05.01 (B5125)

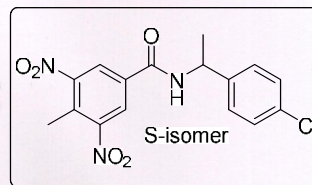

Compound Table

| Compound Label           | RT    | Mass     | Formula          | MFG Formula      | MFG Diff (ppm) | DB Formula       |
|--------------------------|-------|----------|------------------|------------------|----------------|------------------|
| Cpd 18: C16 H14 Cl N3 O5 | 0.187 | 363.0627 | C16 H14 Cl N3 O5 | C16 H14 Cl N3 O5 | -1.25          | C16 H14 Cl N3 O5 |

| Compound Label           | m/z      | RT    | Algorithm                 | Mass     |
|--------------------------|----------|-------|---------------------------|----------|
| Cpd 18: C16 H14 Cl N3 O5 | 362.0555 | 0.187 | Find by Molecular Feature | 363.0627 |

MFE MS Spectrum

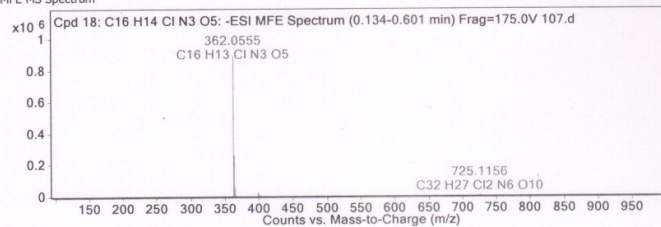

MS Spectrum Peak List

| m/z      | z  | Abund     | Formula            | Ion     |
|----------|----|-----------|--------------------|---------|
| 362.0555 | -1 | 888825.13 | C16 H13 Cl N3 O5   | (M-H)-  |
| 363.0584 | -1 | 146993.73 | C16 H13 Cl N3 O5   | (M-H)-  |
| 364.0529 | -1 | 260138.05 | C16 H13 Cl N3 O5   | (M-H)-  |
| 365.0556 | -1 | 45648.43  | C16 H13 Cl N3 O5   | (M-H)-  |
| 366.0582 | -1 | 6131.97   | C16 H13 Cl N3 O5   | (M-H)-  |
| 398.0315 | -1 | 24369.5   | C16 H14 Cl2 N3 O5  | (M+Cl)- |
| 399.0341 | -1 | 4515.21   | C16 H14 Cl2 N3 O5  | (M+Cl)- |
| 400.029  | -1 | 17215.26  | C16 H14 Cl2 N3 O5  | (M+Cl)- |
| 725.1156 | -1 | 6860.29   | C32 H27 Cl2 N6 O10 | (2M-H)- |
| 727.1155 | -1 | 5726.6    | C32 H27 Cl2 N6 O10 | (2M-H)- |

Predicted Isotope Match Table

| Isotope | m/z      | Calc m/z | Diff (ppm) | Abund % | Calc Abund % | Abund Sum % | Calc Abund Sum % |
|---------|----------|----------|------------|---------|--------------|-------------|------------------|
| 1       | 362.0555 | 362.0549 | -1.46      | 100     | 100          | 65.92       | 62.23            |
| 2       | 363.0584 | 363.0579 | -1.13      | 16.54   | 18.74        | 10.9        | 11.66            |
| 3       | 364.0529 | 364.0526 | -0.67      | 29.27   | 34.68        | 19.29       | 21.59            |
| 4       | 365.0556 | 365.0553 | -0.71      | 5.14    | 6.28         | 3.39        | 3.91             |
| 5       | 366.0582 | 366.0575 | -1.76      | 0.69    | 0.88         | 0.45        | 0.55             |
| 6       | 367.0594 | 367.0599 | 1.41       | 0.08    | 0.09         | 0.05        | 0.06             |

--- End Of Report ---

$^1\text{H}$  NMR (400 MHz,  $\text{CDCl}_3$ ) of compound **7g**:

July23-2012-purnima

OME-ME-R

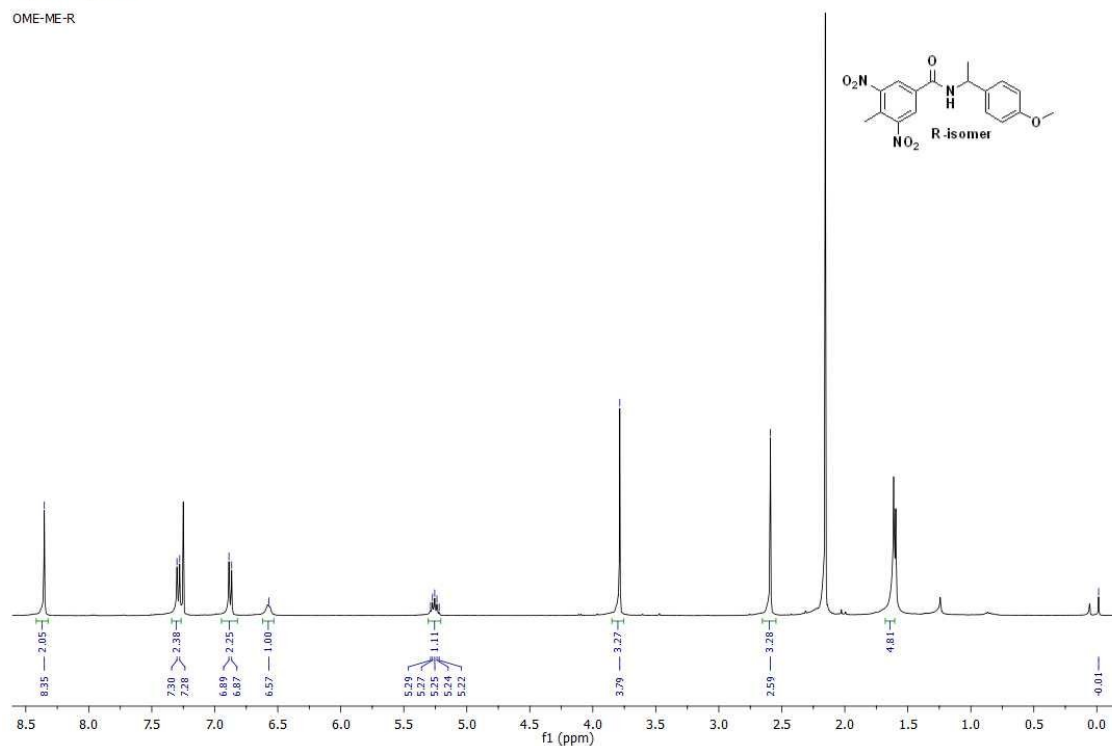

$^{13}\text{C}$  NMR (126 MHz,  $\text{Acetone-d}_6$ ) of compound **7g**:

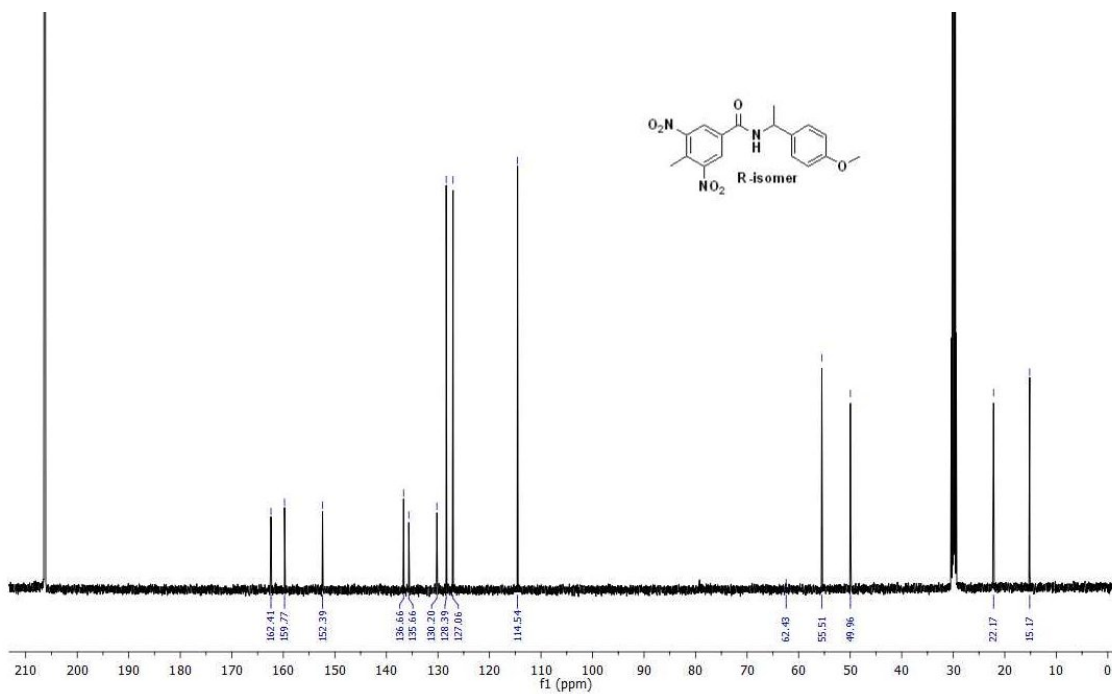



DEPT (126 MHz, Acetone-d<sub>6</sub>) of compound **7g**:

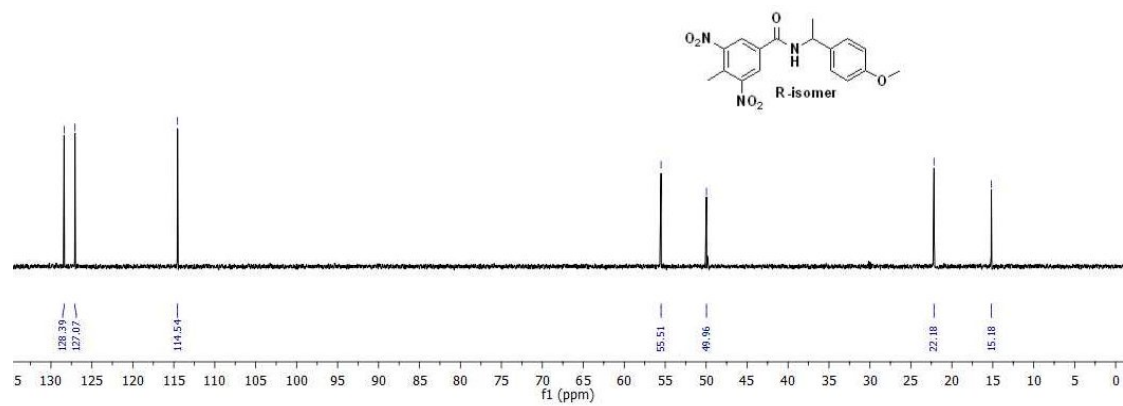

HRMS (ESI-TOF) of compound **7g**:

### Qualitative Compound Report

|                               |                                   |                      |                        |
|-------------------------------|-----------------------------------|----------------------|------------------------|
| <b>Data File</b>              | 108.d                             | <b>Sample Name</b>   | Unavailable            |
| <b>Sample Type</b>            | Unavailable                       | <b>Position</b>      | Unavailable            |
| <b>Instrument Name</b>        | Unavailable                       | <b>User Name</b>     | Unavailable            |
| <b>Acq Method</b>             |                                   | <b>Acquired Time</b> | Unavailable            |
| <b>IRM Calibration Status</b> | Success                           | <b>DA Method</b>     | SamplePurity-Default.m |
| <b>Comment</b>                | Sample information is unavailable |                      |                        |

**Compound Table**

| Compound Label       | RT    | Mass    | Formula       | MFG Formula   | MFG Diff (ppm) | DB Formula    |
|----------------------|-------|---------|---------------|---------------|----------------|---------------|
| Cpd 8: C17 H17 N3 O6 | 0.187 | 359.112 | C17 H17 N3 O6 | C17 H17 N3 O6 | -0.68          | C17 H17 N3 O6 |

| Compound Label       | m/z      | RT    | Algorithm                 | Mass    |
|----------------------|----------|-------|---------------------------|---------|
| Cpd 8: C17 H17 N3 O6 | 358.1047 | 0.187 | Find by Molecular Feature | 359.112 |

**MFE MS Spectrum**

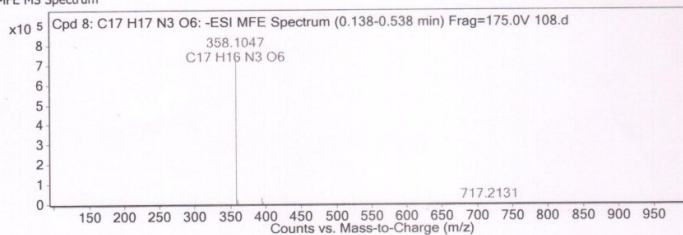

**MS Spectrum Peak List**

| m/z      | z  | Abund     | Formula          | Ion     |
|----------|----|-----------|------------------|---------|
| 358.1047 | -1 | 730385    | C17 H16 N3 O6    | (M-H)-  |
| 359.1077 | -1 | 130747.51 | C17 H16 N3 O6    | (M-H)-  |
| 360.11   | -1 | 20668.91  | C17 H16 N3 O6    | (M-H)-  |
| 361.113  | -1 | 2918.45   | C17 H16 N3 O6    | (M-H)-  |
| 394.0813 | -1 | 29872.61  | C17 H17 Cl N3 O6 | (M+Cl)- |
| 395.0845 | -1 | 6219.38   | C17 H17 Cl N3 O6 | (M+Cl)- |
| 396.0786 | -1 | 8793.79   | C17 H17 Cl N3 O6 | (M+Cl)- |
| 397.0814 | -1 | 2150.94   | C17 H17 Cl N3 O6 | (M+Cl)- |
| 717.2131 | -1 | 853.04    |                  | (2M-H)- |
| 718.2115 | -1 | 458.15    |                  | (2M-H)- |

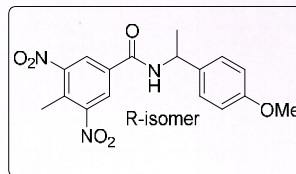

**Predicted Isotope Match Table**

| Isotope | m/z      | Calc m/z | Diff (ppm) | Abund % | Calc Abund % | Abund Sum % | Calc Abund Sum % |
|---------|----------|----------|------------|---------|--------------|-------------|------------------|
| 1       | 358.1047 | 358.1045 | -0.7       | 100     | 100          | 82.56       | 81.06            |
| 2       | 359.1077 | 359.1075 | -0.58      | 17.9    | 19.9         | 14.78       | 16.13            |
| 3       | 360.11   | 360.1098 | -0.5       | 2.83    | 3.11         | 2.34        | 2.52             |
| 4       | 361.113  | 361.1123 | -2.01      | 0.4     | 0.36         | 0.33        | 0.29             |

--- End Of Report ---

<sup>1</sup>H NMR (400 MHz, CDCl<sub>3</sub>) of compound **7h**:

July25-2012-purnima  
ome-meDNB-S

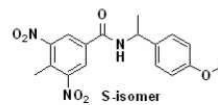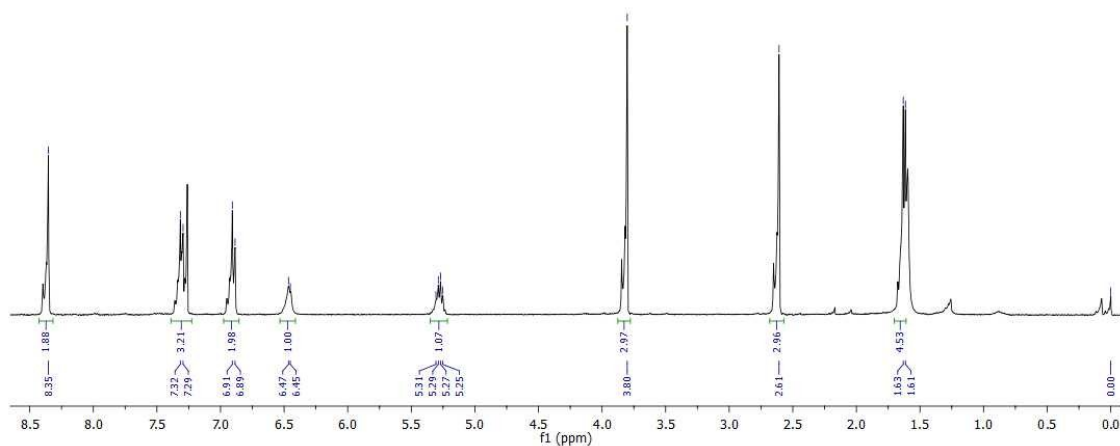

<sup>13</sup>C NMR (126 MHz, Acetone-d<sub>6</sub>) of compound **7h**:

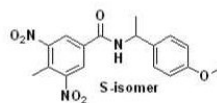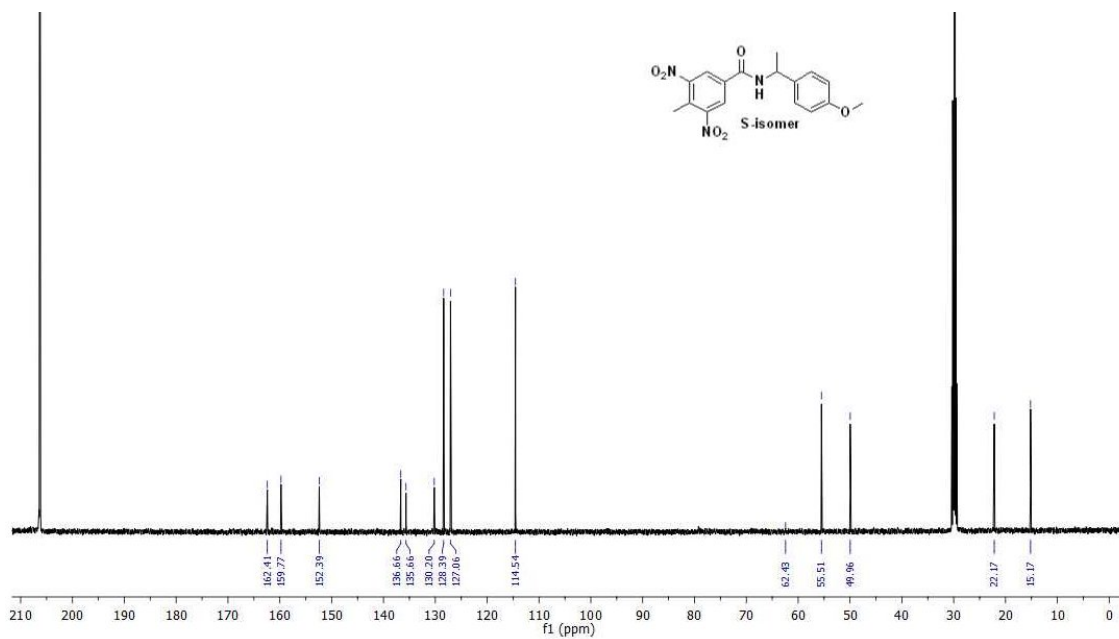

DEPT (126 MHz, Acetone-d<sub>6</sub>) of compound **7h**:

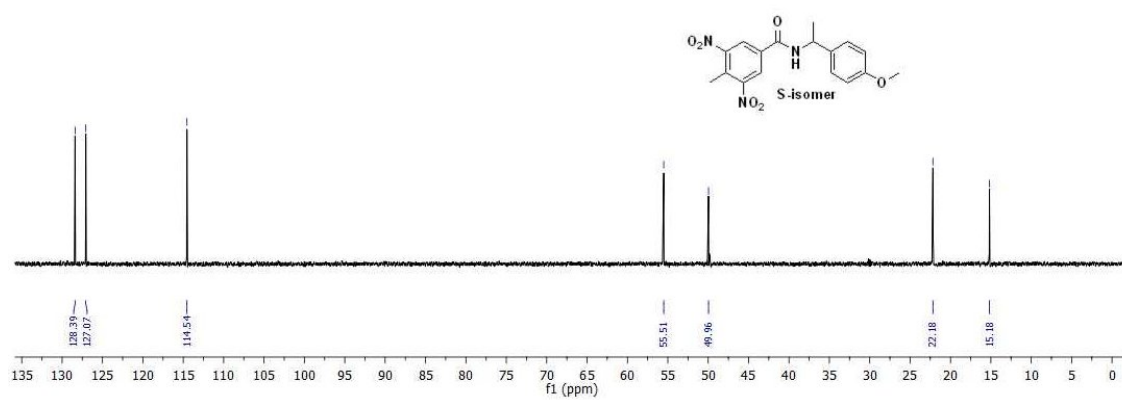

HRMS (ESI-TOF) of compound **7h**:

## Qualitative Compound Report

|                               |                      |                      |                        |
|-------------------------------|----------------------|----------------------|------------------------|
| <b>Data File</b>              | 109.d                | <b>Sample Name</b>   | 108                    |
| <b>Sample Type</b>            | Sample               | <b>Position</b>      | Vial 35                |
| <b>Instrument Name</b>        | Instrument 1         | <b>User Name</b>     |                        |
| <b>Acq Method</b>             | vishal_neg12-01-13.m | <b>Acquired Time</b> | 07-03-2013 PM 6:10:12  |
| <b>IRM Calibration Status</b> | Success              | <b>DA Method</b>     | SamplePurity-Default.m |
| <b>Comment</b>                |                      |                      |                        |

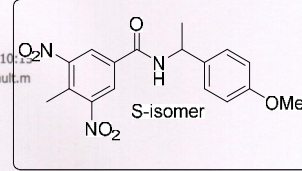

|                       |                             |              |  |
|-----------------------|-----------------------------|--------------|--|
| <b>Sample Group</b>   |                             | <b>Info.</b> |  |
| <b>Acquisition SW</b> | 6200 series TOF/6500 series |              |  |
| <b>Version</b>        | Q-TOF B.05.01 (B5125)       |              |  |

### Compound Table

| Compound Label       | RT    | Mass    | Formula       | MFG Formula   | MFG Diff (ppm) | DB Formula    |
|----------------------|-------|---------|---------------|---------------|----------------|---------------|
| Cpd 9: C17 H17 N3 O6 | 0.187 | 359.112 | C17 H17 N3 O6 | C17 H17 N3 O6 | -0.68          | C17 H17 N3 O6 |

| Compound Label       | m/z      | RT    | Algorithm                 | Mass    |
|----------------------|----------|-------|---------------------------|---------|
| Cpd 9: C17 H17 N3 O6 | 358.1047 | 0.187 | Find by Molecular Feature | 359.112 |

### MFE MS Spectrum

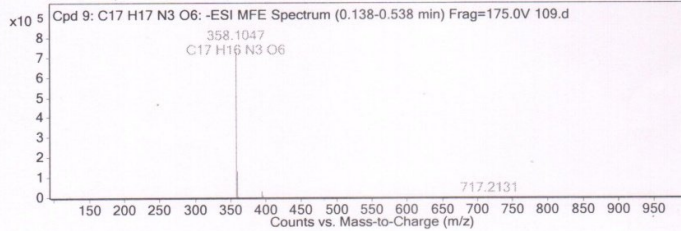

### MS Spectrum Peak List

| m/z      | z  | Abund     | Formula          | Ion     |
|----------|----|-----------|------------------|---------|
| 358.1047 | -1 | 730537.94 | C17 H16 N3 O6    | (M-H)-  |
| 359.1077 | -1 | 130747.51 | C17 H16 N3 O6    | (M-H)-  |
| 360.11   | -1 | 20668.91  | C17 H16 N3 O6    | (M-H)-  |
| 361.113  | -1 | 2918.45   | C17 H16 N3 O6    | (M-H)-  |
| 394.0813 | -1 | 29872.61  | C17 H17 Cl N3 O6 | (M+Cl)- |
| 395.0845 | -1 | 6219.38   | C17 H17 Cl N3 O6 | (M+Cl)- |
| 396.0786 | -1 | 8793.79   | C17 H17 Cl N3 O6 | (M+Cl)- |
| 397.0814 | -1 | 2150.94   | C17 H17 Cl N3 O6 | (M+Cl)- |
| 717.2131 | -1 | 853.04    |                  | (2M-H)- |
| 718.2115 | -1 | 458.15    |                  | (2M-H)- |

### Predicted Isotope Match Table

| Isotope | m/z      | Calc m/z | Diff (ppm) | Abund % | Calc Abund % | Abund Sum % | Calc Abund Sum % |
|---------|----------|----------|------------|---------|--------------|-------------|------------------|
| 1       | 358.1047 | 358.1045 | -0.7       | 100     | 100          | 82.56       | 81.06            |
| 2       | 359.1077 | 359.1075 | -0.58      | 17.9    | 19.9         | 14.78       | 16.13            |
| 3       | 360.11   | 360.1098 | -0.5       | 2.83    | 3.11         | 2.34        | 2.52             |
| 4       | 361.113  | 361.1123 | -2.01      | 0.4     | 0.36         | 0.33        | 0.29             |

--- End Of Report ---

$^1\text{H}$  NMR (400 MHz,  $\text{CDCl}_3$ ) of compound **7i**:

R-phme-meDNB  
R-phMe-Me DNb

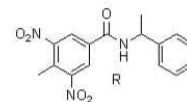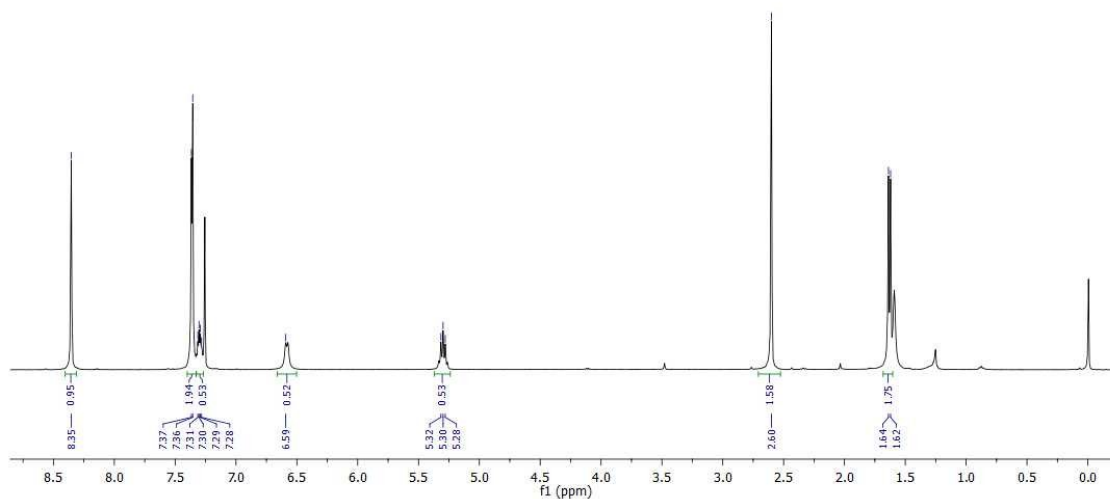

$^{13}\text{C}$  NMR (126 MHz, Acetone- $d_6$ ) of compound **7i**:

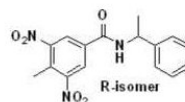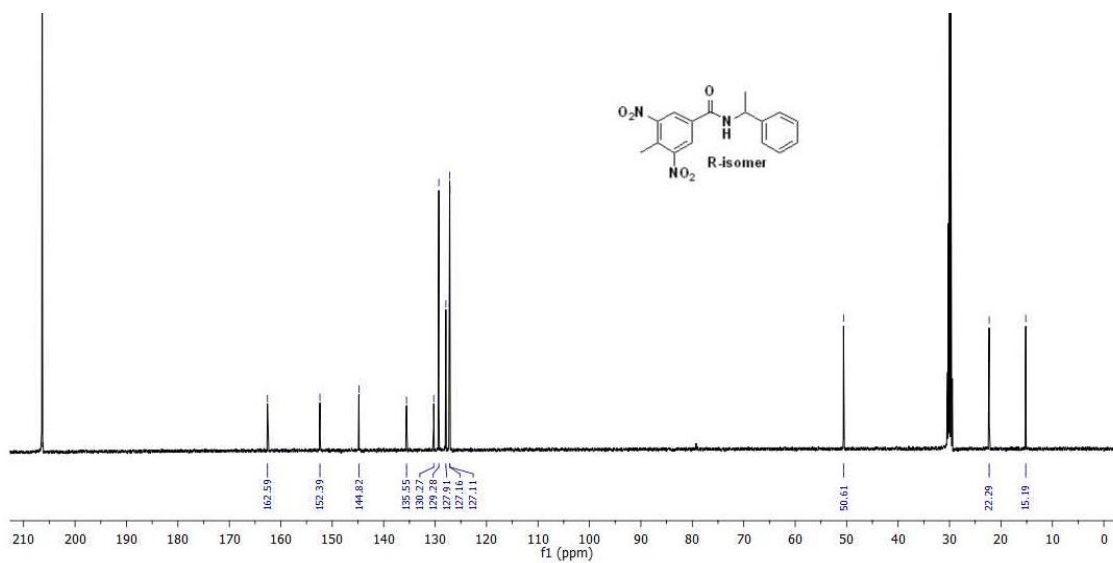

DEPT (126 MHz, Acetone- $d_6$ ) of compound **7i**:

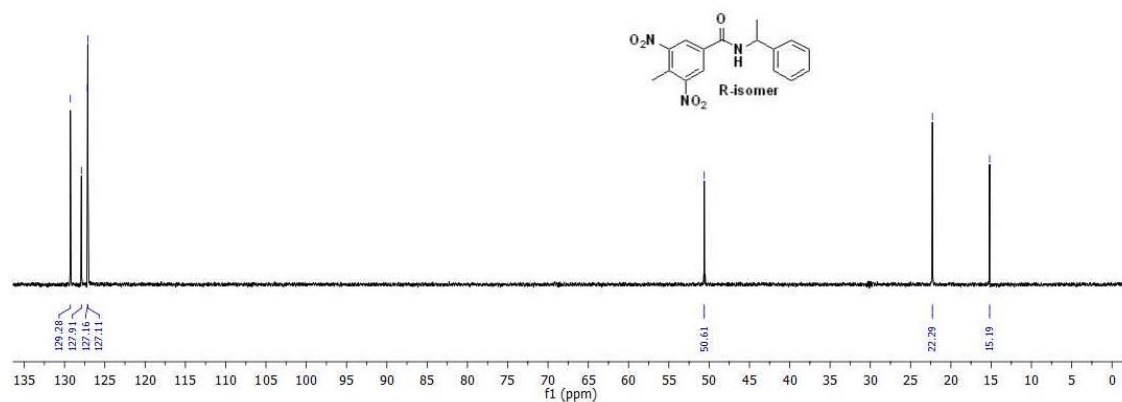

HRMS (ESI-TOF) of compound **7i**:

## Qualitative Compound Report

|                        |                      |               |                        |
|------------------------|----------------------|---------------|------------------------|
| Data File              | 99.d                 | Sample Name   | 99                     |
| Sample Type            | Sample               | Position      | Vial 21                |
| Instrument Name        | Instrument 1         | User Name     |                        |
| Acq Method             | vishal_neg12-01-13.m | Acquired Time | 06-03-2013 PM 5:28:04  |
| IRM Calibration Status | Success              | DA Method     | SamplePurity-Default.m |
| Comment                |                      |               |                        |

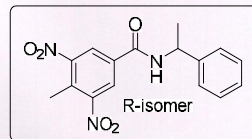

|                |                             |
|----------------|-----------------------------|
| Sample Group   | Info.                       |
| Acquisition SW | 6200 series TOF/6500 series |
| Version        | Q-TOF B.05.01 (B5125)       |

### Compound Table

| Compound Label       | RT   | Mass     | Formula       | MFG Formula   | MFG Diff (ppm) | DB Formula    |
|----------------------|------|----------|---------------|---------------|----------------|---------------|
| Cpd 8: C16 H15 N3 O5 | 0.19 | 329.1014 | C16 H15 N3 O5 | C16 H15 N3 O5 | -0.8           | C16 H15 N3 O5 |

| Compound Label       | m/z      | RT   | Algorithm                 | Mass     |
|----------------------|----------|------|---------------------------|----------|
| Cpd 8: C16 H15 N3 O5 | 328.0942 | 0.19 | Find by Molecular Feature | 329.1014 |

### MFE MS Spectrum

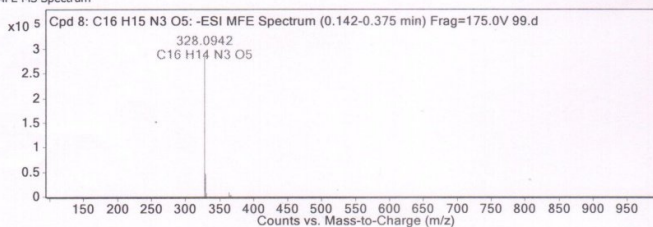

### MS Spectrum Peak List

| m/z      | z  | Abund     | Formula          | Ion     |
|----------|----|-----------|------------------|---------|
| 328.0942 | -1 | 284907.25 | C16 H14 N3 O5    | (M-H)-  |
| 329.0971 | -1 | 45430.21  | C16 H14 N3 O5    | (M-H)-  |
| 330.099  | -1 | 7460.65   | C16 H14 N3 O5    | (M-H)-  |
| 331.1013 | -1 | 1087.23   | C16 H14 N3 O5    | (M-H)-  |
| 364.0706 | -1 | 7781.35   | C16 H15 Cl N3 O5 | (M+Cl)- |
| 365.0733 | -1 | 1039.23   | C16 H15 Cl N3 O5 | (M+Cl)- |
| 366.0663 | -1 | 2634.72   | C16 H15 Cl N3 O5 | (M+Cl)- |
| 367.0704 | -1 | 664.86    | C16 H15 Cl N3 O5 | (M+Cl)- |
| 368.0825 | -1 | 482.18    | C16 H15 Cl N3 O5 | (M+Cl)- |

### Predicted Isotope Match Table

| Isotope | m/z      | Calc m/z | Diff (ppm) | Abund % | Calc Abund % | Abund Sum % | Calc Abund Sum % |
|---------|----------|----------|------------|---------|--------------|-------------|------------------|
| 1       | 328.0942 | 328.0939 | -0.88      | 100     | 100          | 84.07       | 82.15            |
| 2       | 329.0971 | 329.0969 | -0.56      | 15.95   | 18.75        | 13.41       | 15.41            |
| 3       | 330.099  | 330.0992 | 0.57       | 2.62    | 2.69         | 2.2         | 2.21             |
| 4       | 331.1013 | 331.1017 | 1.27       | 0.38    | 0.28         | 0.32        | 0.23             |

--- End Of Report ---

<sup>1</sup>H NMR (400 MHz, CDCl<sub>3</sub>) of compound 7j



May18-2012-pumima  
R\_ME\_DNB

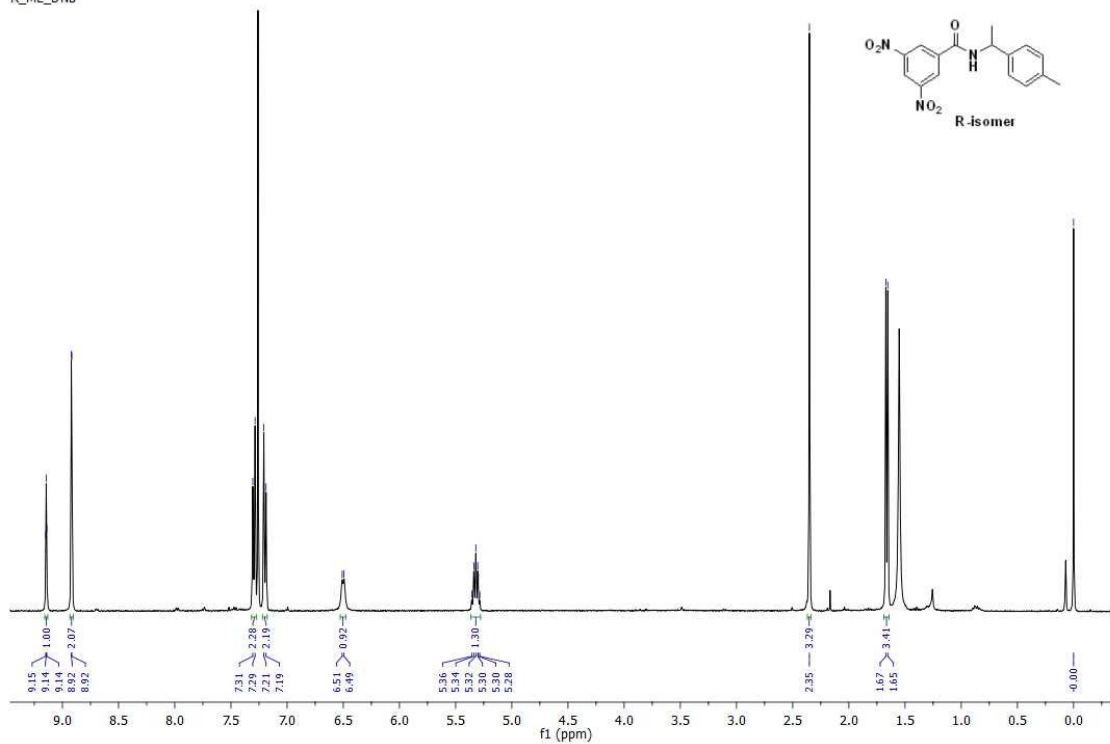

$^{13}\text{C}$  NMR (101 MHz, Acetone- $\text{d}_6$ ) of compound **7j**:

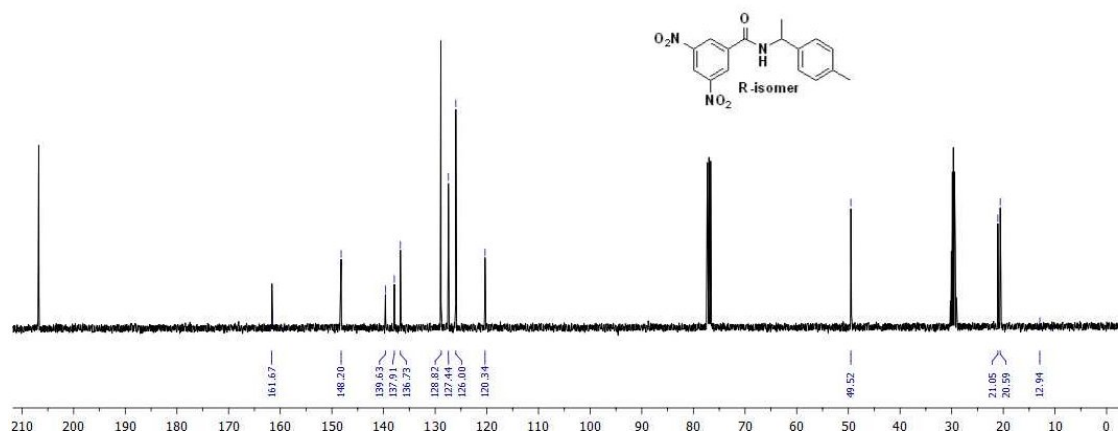

DEPT (101 MHz, Acetone- $\text{d}_6$ ) of compound **7j**:

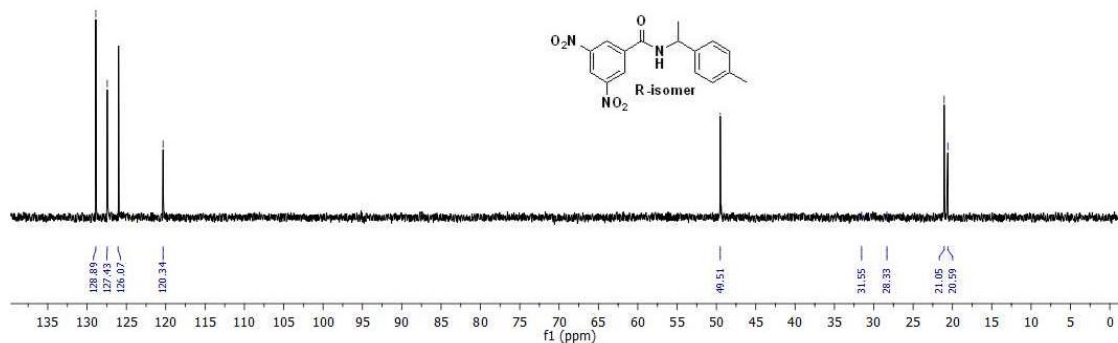

HRMS (ESI-TOF) of compound 7j:

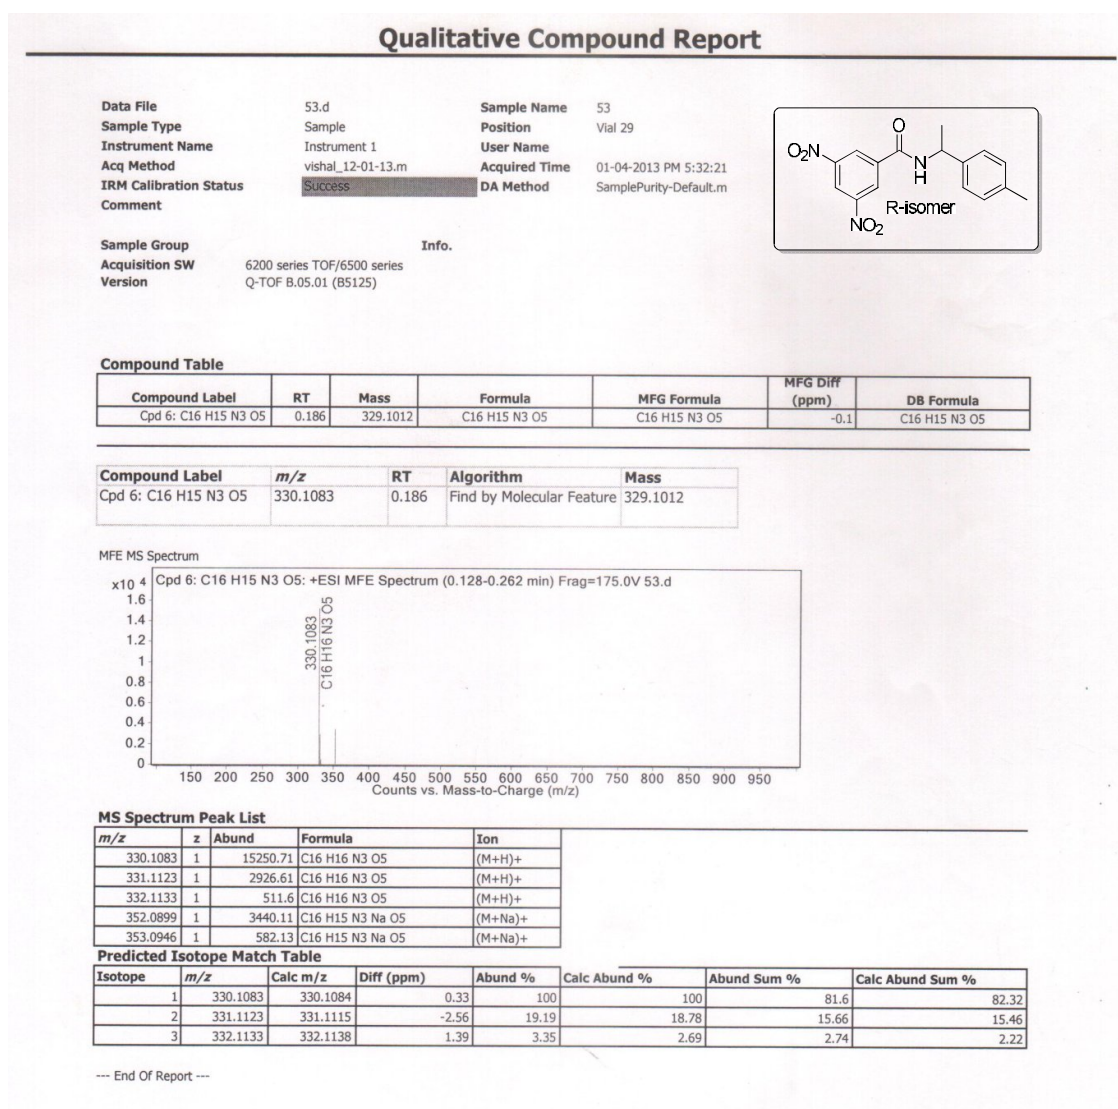

<sup>1</sup>H NMR (400 MHz, CDCl<sub>3</sub>) of compound 7k

May18-2012-pumima  
S-4-ME-DNB

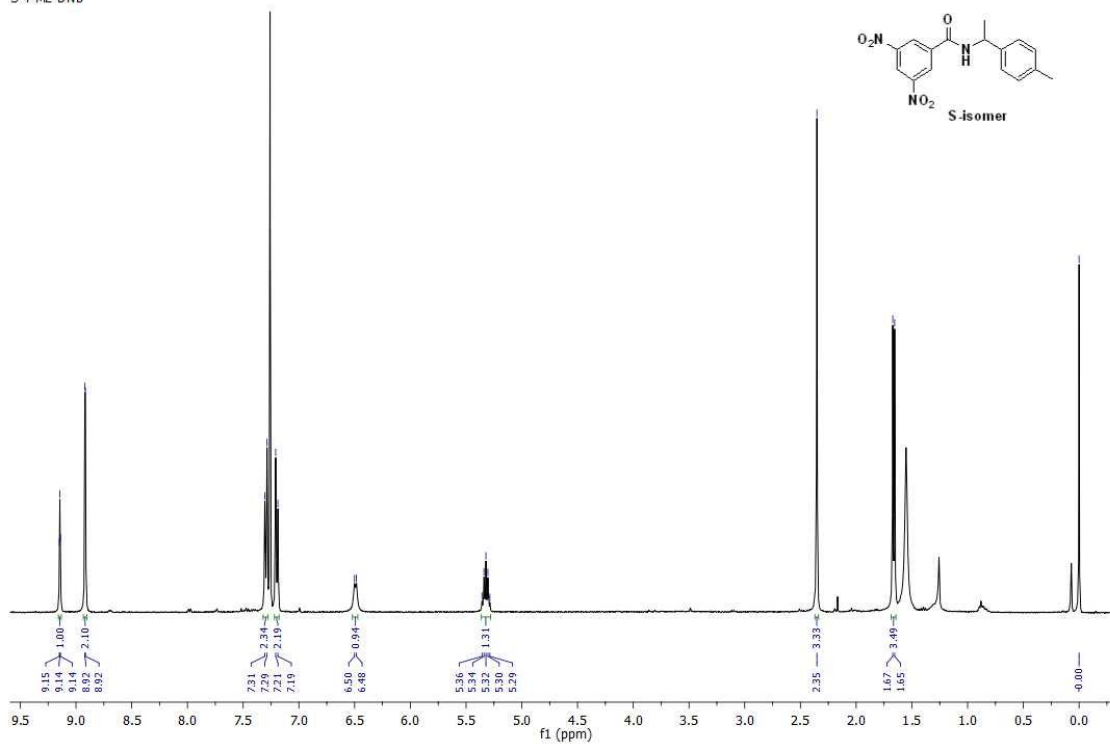

$^{13}\text{C}$  NMR (101 MHz, Acetone- $\text{d}_6$ ) of compound **7j**:

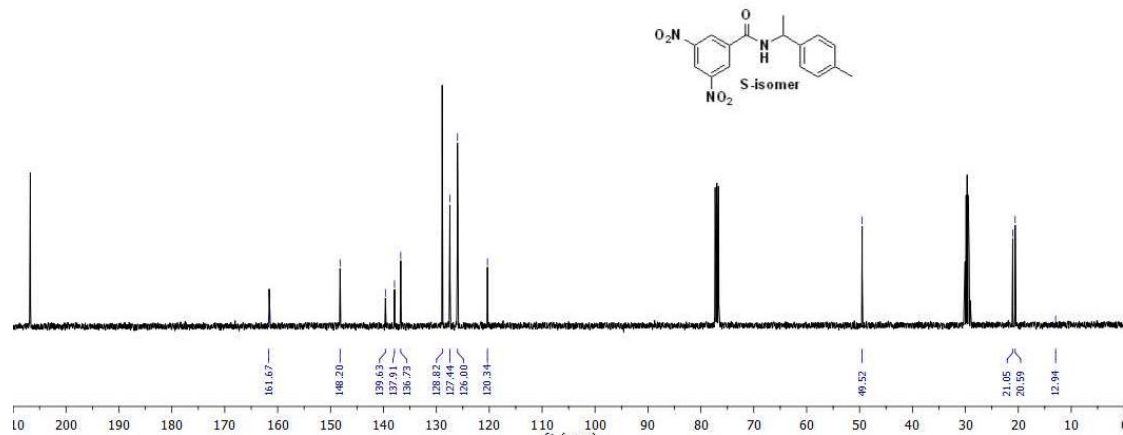

DEPT (101 MHz, Acetone- $\text{d}_6$ ) of compound **7j**:

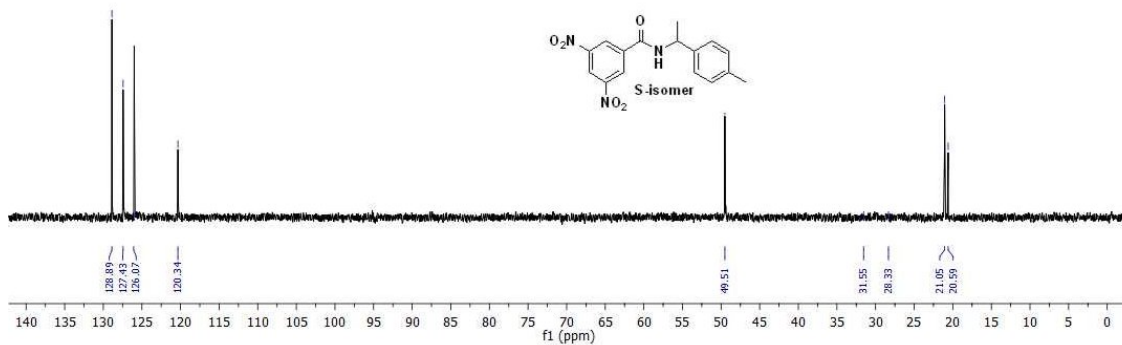

HRMS (ESI-TOF) of compound **7k**:

## Qualitative Compound Report

|                        |                      |               |                        |
|------------------------|----------------------|---------------|------------------------|
| Data File              | 54.d                 | Sample Name   | 54                     |
| Sample Type            | Sample               | Position      | Vial 19                |
| Instrument Name        | Instrument 1         | User Name     |                        |
| Acq Method             | vishal_neg12-01-13.m | Acquired Time | 04-03-2013 PM 3:32:15  |
| IRM Calibration Status | Success              | DA Method     | SamplePurity-Default.m |
| Comment                |                      |               |                        |

|                |                             |       |
|----------------|-----------------------------|-------|
| Sample Group   |                             | Info. |
| Acquisition SW | 6200 series TOF/6500 series |       |
| Version        | Q-TOF B.05.01 (B5125)       |       |

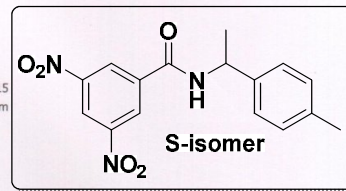

### Compound Table

| Compound Label       | RT    | Mass     | Formula       | MFG Formula   | MFG Diff (ppm) | DB Formula    |
|----------------------|-------|----------|---------------|---------------|----------------|---------------|
| Cpd 6: C16 H15 N3 O5 | 0.193 | 329.1012 | C16 H15 N3 O5 | C16 H15 N3 O5 | -0.05          | C16 H15 N3 O5 |

| Compound Label       | m/z     | RT    | Algorithm                 | Mass     |
|----------------------|---------|-------|---------------------------|----------|
| Cpd 6: C16 H15 N3 O5 | 328.094 | 0.193 | Find by Molecular Feature | 329.1012 |

### MFE MS Spectrum

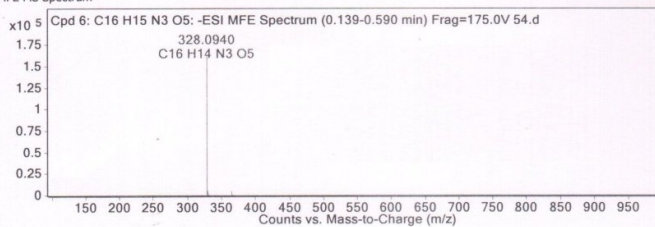

### MS Spectrum Peak List

| m/z      | z  | Abund     | Formula          | Ion     |
|----------|----|-----------|------------------|---------|
| 328.094  | -1 | 162962.91 | C16 H14 N3 O5    | (M-H)-  |
| 329.0966 | -1 | 28099.19  | C16 H14 N3 O5    | (M-H)-  |
| 330.0995 | -1 | 4518.06   | C16 H14 N3 O5    | (M-H)-  |
| 331.1023 | -1 | 853.26    | C16 H14 N3 O5    | (M-H)-  |
| 364.0692 | -1 | 4930.71   | C16 H15 Cl N3 O5 | (M+Cl)- |
| 365.0734 | -1 | 1115.29   | C16 H15 Cl N3 O5 | (M+Cl)- |
| 366.0665 | -1 | 1143.32   | C16 H15 Cl N3 O5 | (M+Cl)- |

### Predicted Isotope Match Table

| Isotope | m/z      | Calc m/z | Diff (ppm) | Abund % | Calc Abund % | Abund Sum % | Calc Abund Sum % |
|---------|----------|----------|------------|---------|--------------|-------------|------------------|
| 1       | 328.094  | 328.0939 | -0.17      | 100     | 100          | 82.96       | 82.15            |
| 2       | 329.0966 | 329.0969 | 0.83       | 17.24   | 18.75        | 14.3        | 15.41            |
| 3       | 330.0995 | 330.0992 | -0.83      | 2.77    | 2.69         | 2.3         | 2.21             |
| 4       | 331.1023 | 331.1017 | -1.85      | 0.52    | 0.28         | 0.43        | 0.23             |

--- End Of Report ---

<sup>1</sup>H NMR (400 MHz, CDCl<sub>3</sub>) of compound **7I**:

Jun08-2012-purnima  
R-FLUORO-DNB

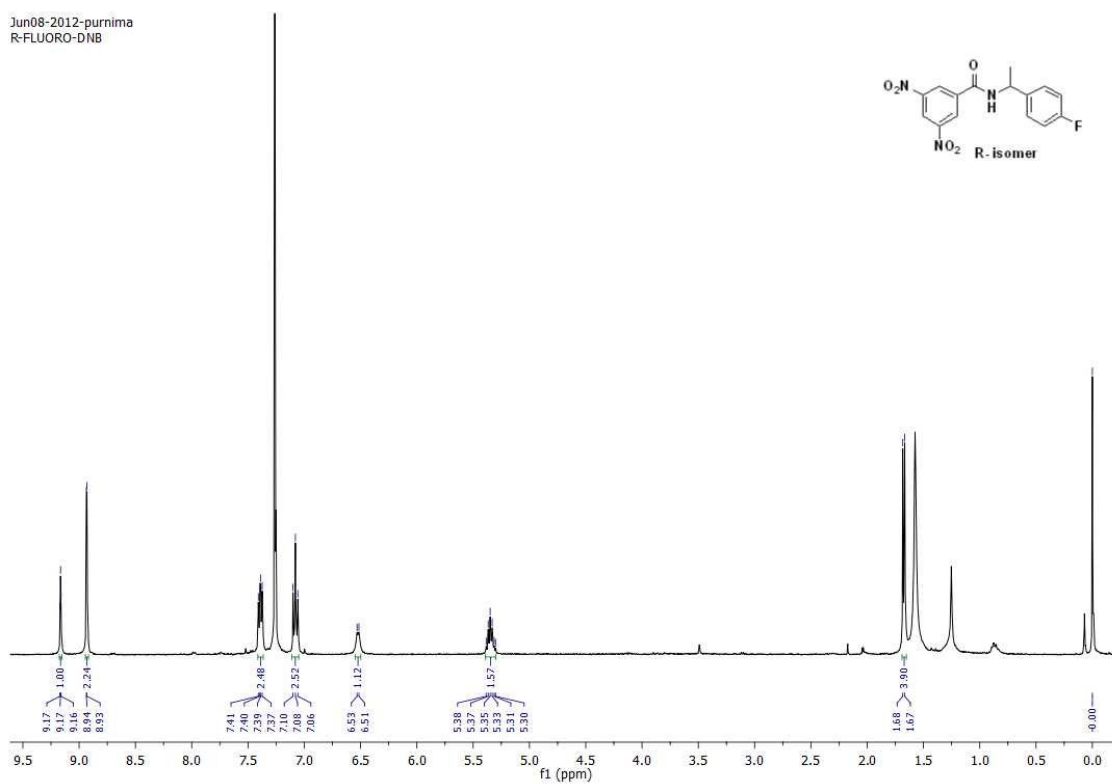

<sup>13</sup>C NMR (126 MHz, Acetone-d<sub>6</sub>) of compound **7I**:

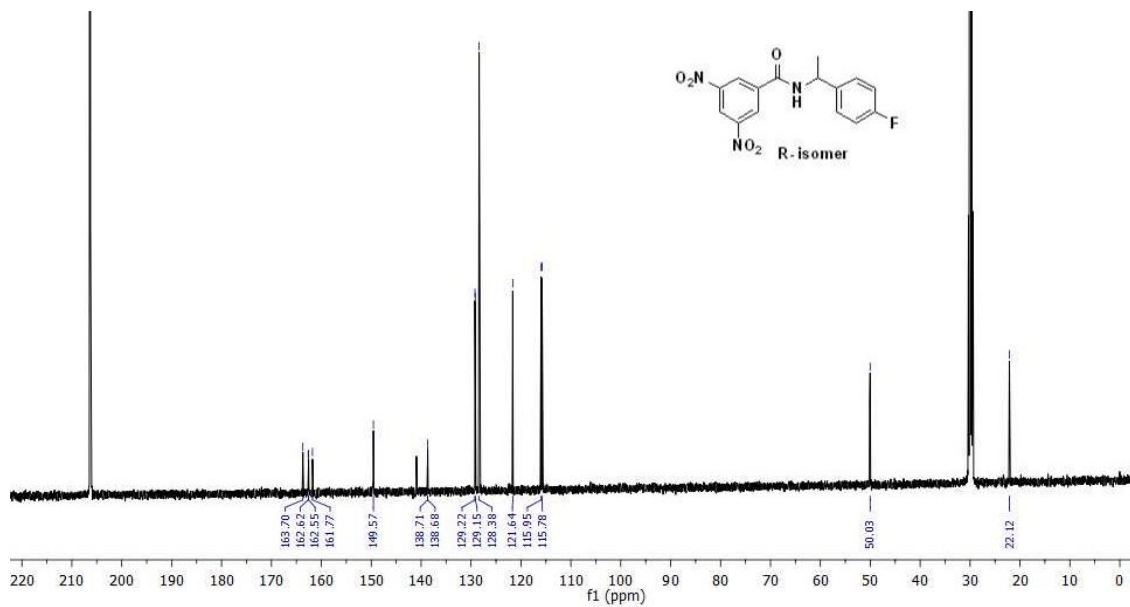

DEPT (126 MHz, Acetone-d<sub>6</sub>) of compound **7I**:

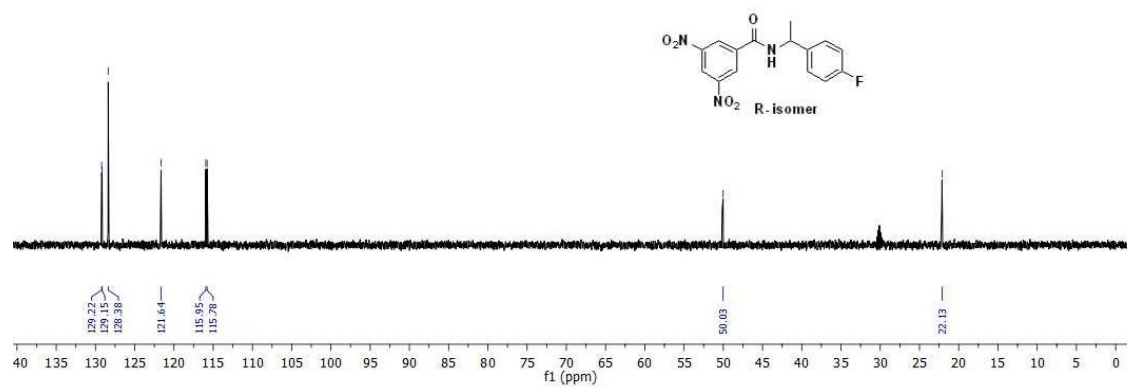

HRMS (ESI-TOF) of compound **71**:

## Qualitative Analysis Report

|                        |                           |               |                       |
|------------------------|---------------------------|---------------|-----------------------|
| Data Filename          | 80.d                      | Sample Name   | 80                    |
| Sample Type            | Sample                    | Position      | Vial 10               |
| Instrument Name        | Instrument 1              | User Name     |                       |
| Acq Method             | vishal_MS_Negative_mode.m | Acquired Time | 7/30/2012 10:01:01 AM |
| IRM Calibration Status | Some Ions Missed          | DA Method     | 2.m                   |
| Comment                |                           |               |                       |

Sample Group      Info.

### User Spectra

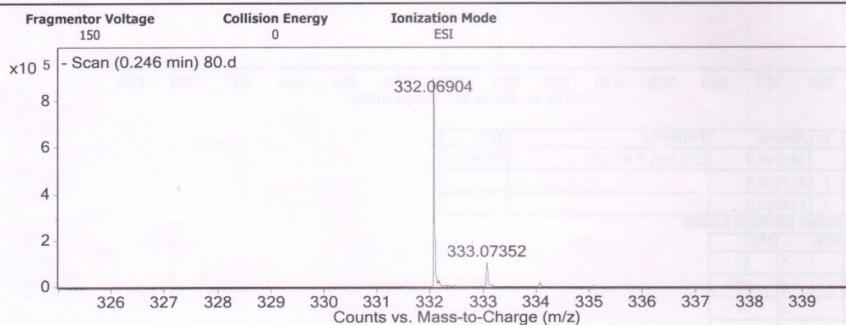

### Peak List

| m/z       | z | Abund     | Formula         | Ion    |
|-----------|---|-----------|-----------------|--------|
| 332.06904 | 1 | 926404.9  | C15 H11 F N3 O5 | (M-H)- |
| 333.07352 | 1 | 112971.7  | C15 H11 F N3 O5 | (M-H)- |
| 446.06253 | 1 | 1538389.1 |                 |        |
| 447.06689 | 1 | 183653.6  |                 |        |

### Formula Calculator Element Limits

| Element | Min | Max |
|---------|-----|-----|
| C       | 3   | 15  |
| H       | 0   | 100 |
| O       | 0   | 5   |
| N       | 0   | 3   |
| S       | 0   | 0   |
| Cl      | 0   | 2   |
| F       | 0   | 1   |
| Na      | 0   | 0   |
| P       | 0   | 0   |
| Br      | 0   | 2   |
| I       | 0   | 0   |

### Formula Calculator Results

| Formula         | Best | Mass      | Tgt Mass | Diff (ppm) | Ion Species     | Score |
|-----------------|------|-----------|----------|------------|-----------------|-------|
| C15 H12 F N3 O5 | TRUE | 333.07632 | 333.0761 | -0.65      | C15 H11 F N3 O5 | 90.23 |

|                           |                       |                        |
|---------------------------|-----------------------|------------------------|
| Fragmentor Voltage<br>150 | Collision Energy<br>0 | Ionization Mode<br>ESI |
|---------------------------|-----------------------|------------------------|

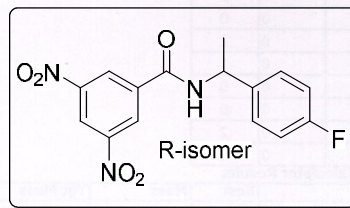

<sup>1</sup>H NMR (400 MHz, CDCl<sub>3</sub>) of compound **7m**:



Jun08-2012-purnima  
S-F-Et-AMENE

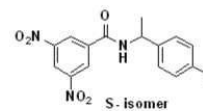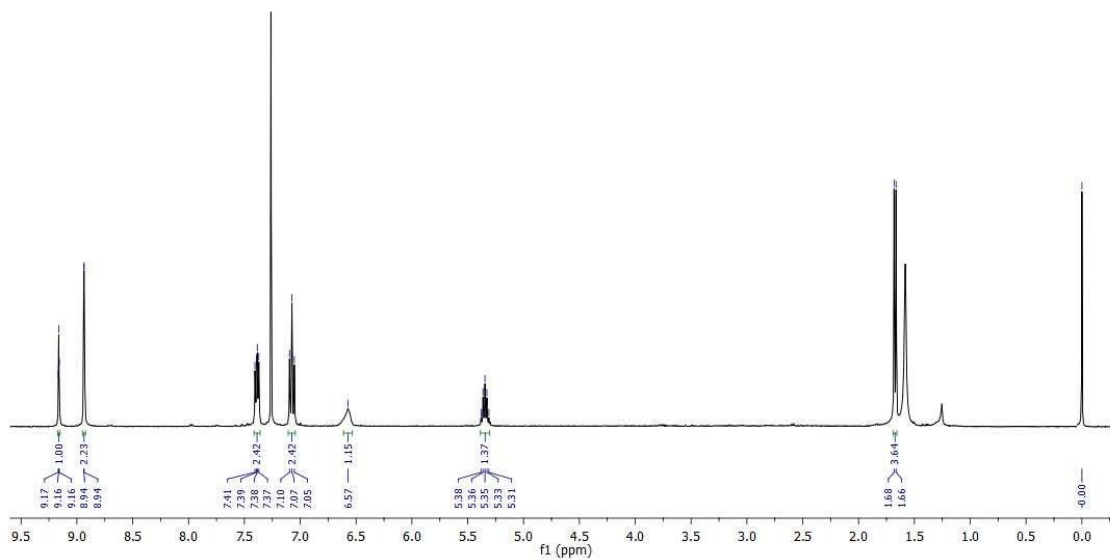

$^{13}\text{C}$  NMR (126 MHz, Acetone- $d_6$ ) of compound **7m**:

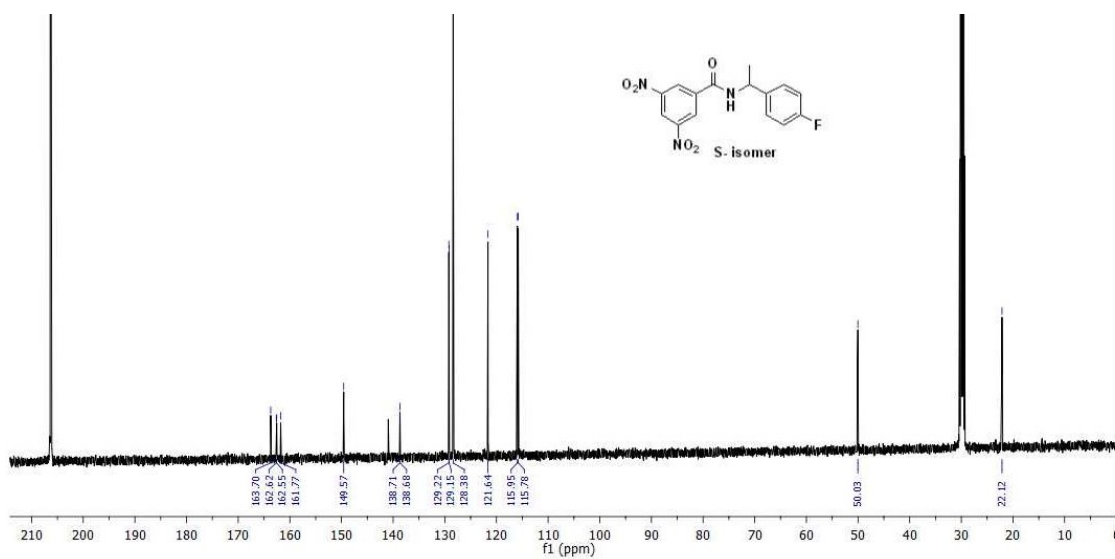

DEPT (126 MHz, Acetone- $d_6$ ) of compound **7m**:

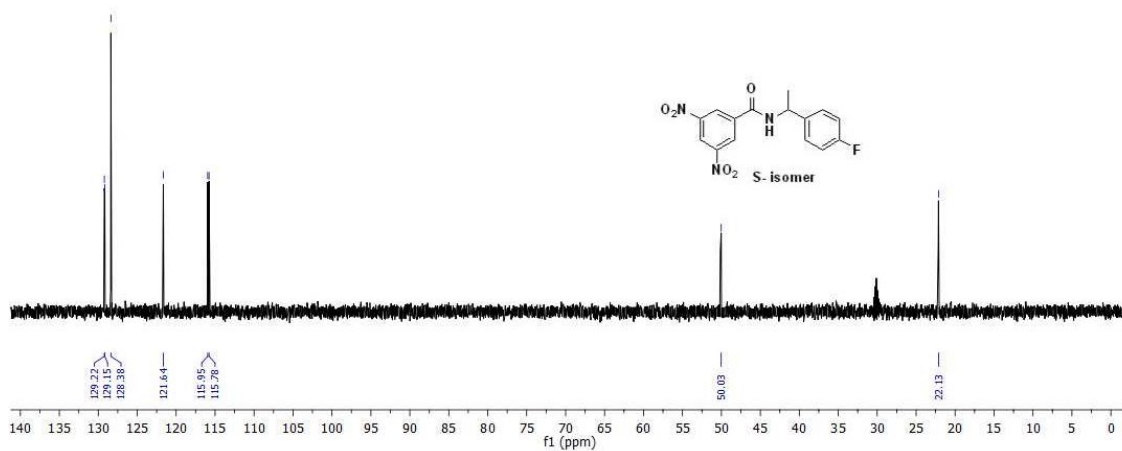

HRMS (ESI-TOF) of compound **7m**:

## Qualitative Analysis Report

|                               |                           |                      |                          |
|-------------------------------|---------------------------|----------------------|--------------------------|
| <b>Data Filename</b>          | 81.d                      | <b>Sample Name</b>   | 81                       |
| <b>Sample Type</b>            | Sample                    | <b>Position</b>      | Vial 11                  |
| <b>Instrument Name</b>        | Instrument 1              | <b>User Name</b>     |                          |
| <b>Acq Method</b>             | vishal_MS_Negative_mode.m | <b>Acquired Time</b> | 30-07-2012 AM 10:06:27   |
| <b>IRM Calibration Status</b> | Some Ions Missed          | <b>DA Method</b>     | Vishal_Compound_report.m |
| <b>Comment</b>                |                           |                      |                          |
| <b>Sample Group</b>           | Info.                     |                      |                          |

### User Spectra

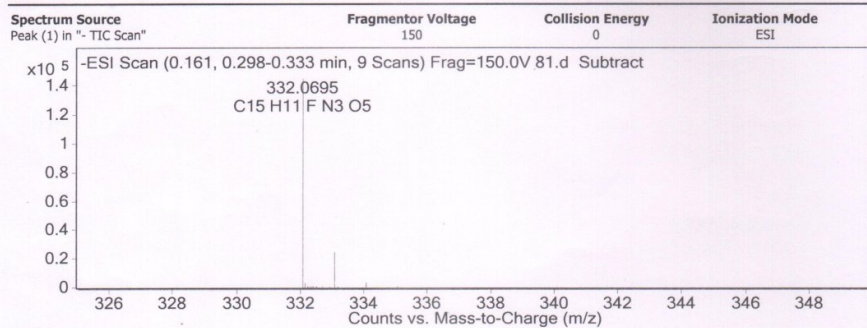

#### Peak List

| m/z      | z | Abund    | Formula         | Ion    |
|----------|---|----------|-----------------|--------|
| 332.0695 | 1 | 144836.4 | C15 H11 F N3 O5 | (M-H)- |
| 333.0728 | 1 | 24628.8  | C15 H11 F N3 O5 | (M-H)- |
| 446.0615 | 1 | 491475.2 |                 |        |
| 447.0656 | 1 | 61988.9  |                 |        |

#### Formula Calculator Element Limits

| Element | Min | Max |
|---------|-----|-----|
| C       | 3   | 80  |
| H       | 0   | 120 |
| O       | 0   | 10  |
| N       | 0   | 10  |
| F       | 0   | 10  |

#### Formula Calculator Results

| Formula          | Best | Mass     | Tgt Mass | Diff (ppm) | Ion Species      | Score |
|------------------|------|----------|----------|------------|------------------|-------|
| C15 H12 F N3 O5  | TRUE | 333.0767 | 333.0761 | -1.9       | C15 H11 F N3 O5  | 98.47 |
| C16 H9 F4 N4     |      | 333.0767 | 333.0763 | -1.2       | C16 H8 F4 N4     | 98.04 |
| C17 H14 F O6     |      | 333.0767 | 333.0774 | 2.13       | C17 H13 F O6     | 97.66 |
| C13 H11 F8 N     |      | 333.0767 | 333.0764 | -1.07      | C13 H10 F8 N     | 97.5  |
| C12 H13 F2 N3 O6 |      | 333.0767 | 333.0772 | 1.53       | C12 H12 F2 N3 O6 | 97.18 |
| C13 H10 F5 N4 O  |      | 333.0767 | 333.0775 | 2.23       | C13 H9 F5 N4 O   | 97.1  |
| C16 H8 F N7 O    |      | 333.0767 | 333.0774 | 2.11       | C16 H7 F N7 O    | 95.45 |
| C11 H8 F5 N7     |      | 333.0767 | 333.0761 | -1.81      | C11 H7 F5 N7     | 95.35 |
| C12 H14 F5 O5    |      | 333.0767 | 333.0761 | -1.77      | C12 H13 F5 O5    | 95.33 |
| C18 H11 F4 N O   |      | 333.0767 | 333.0777 | 2.84       | C18 H10 F4 N O   | 94.95 |

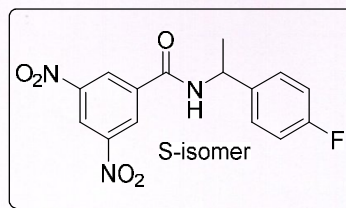

--- End Of Report ---

<sup>1</sup>H NMR (400 MHz, CDCl<sub>3</sub>) of compound **7n**:

July30-2012-purnima  
C-DNB-R

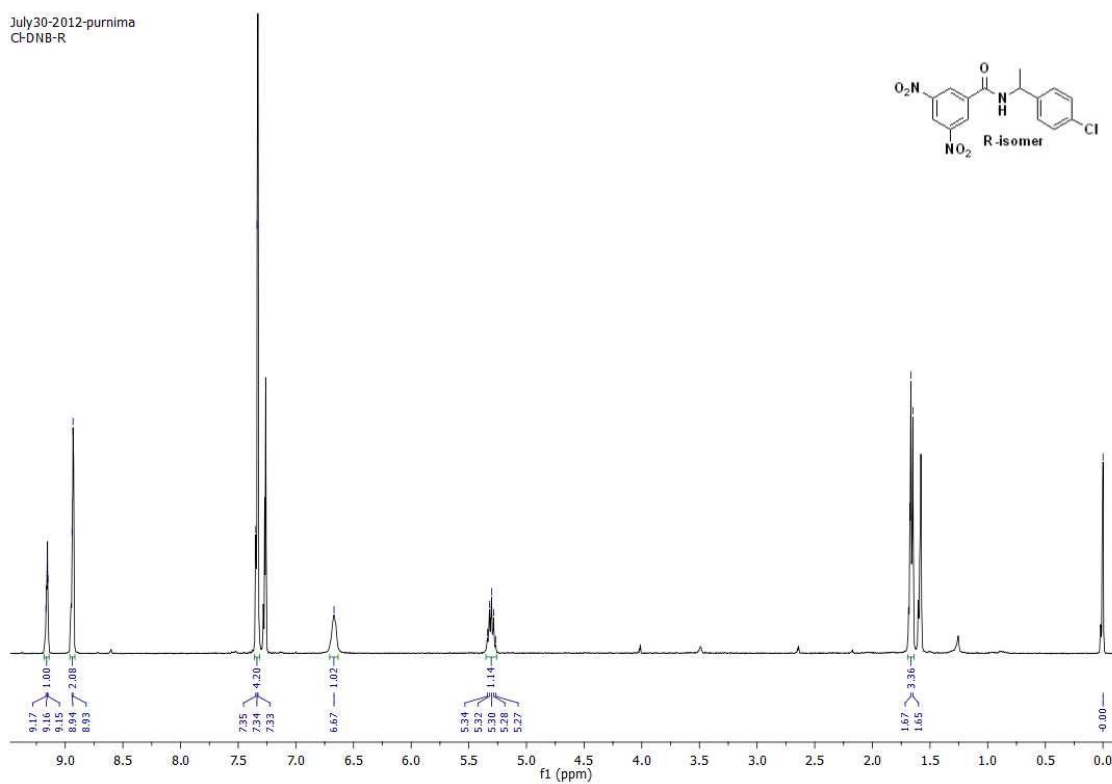

$^{13}\text{C}$  NMR (126 MHz, Acetone- $d_6$ ) of compound **7n**:

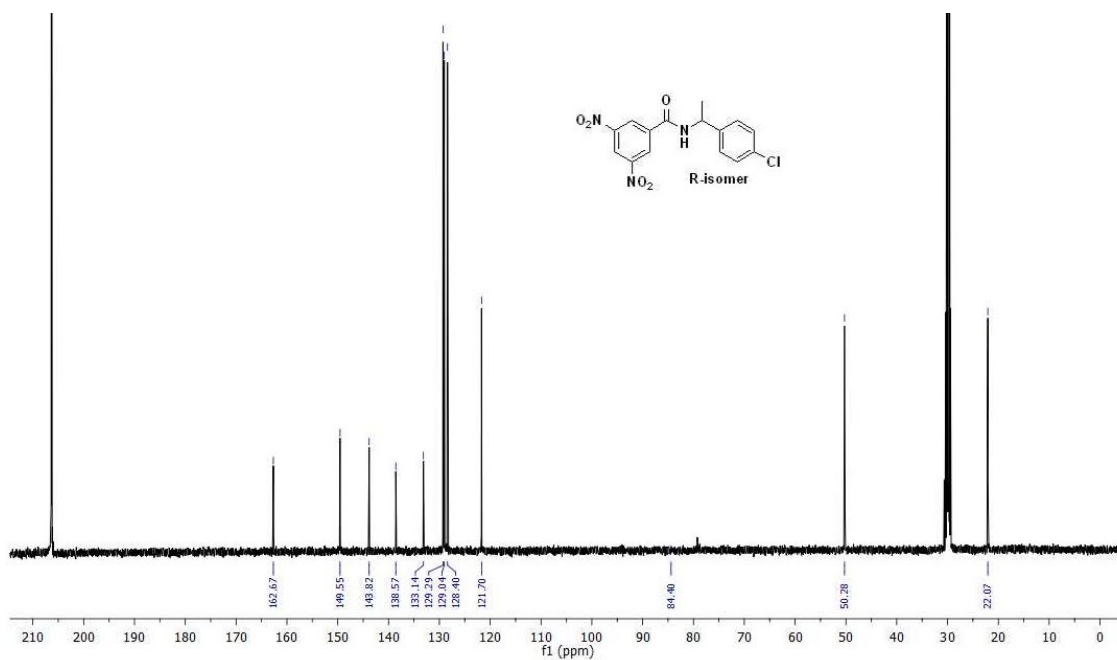

DEPT (126 MHz, Acetone- $d_6$ ) of compound **7n**:

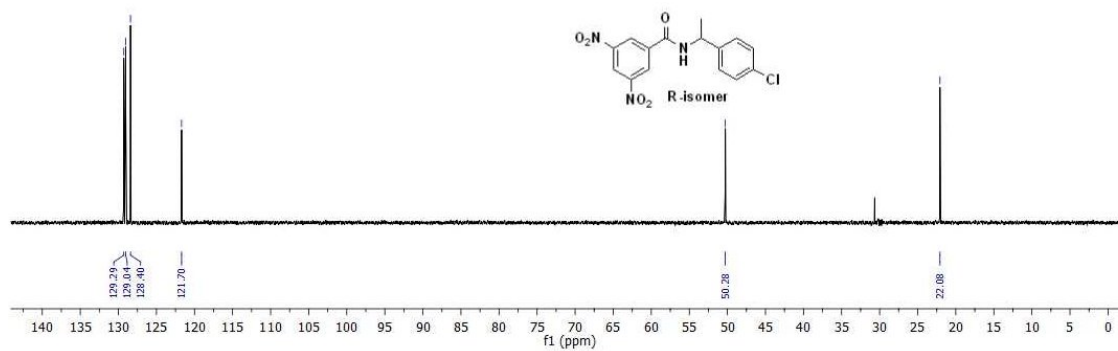

HRMS (ESI-TOF) of compound **7n**:

## Qualitative Compound Report

|                        |                      |               |                        |
|------------------------|----------------------|---------------|------------------------|
| Data File              | 102.d                | Sample Name   | 102                    |
| Sample Type            | Sample               | Position      | Vial 3                 |
| Instrument Name        | Instrument 1         | User Name     |                        |
| Acq Method             | vishal_neg12-01-13.m | Acquired Time | 06-03-2013 PM 4:19:34  |
| IRM Calibration Status | Success              | DA Method     | SamplePurity-Default.m |
| Comment                |                      |               |                        |

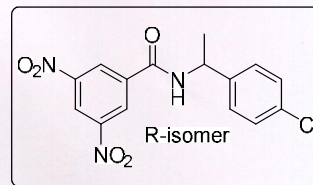

|                |                             |
|----------------|-----------------------------|
| Sample Group   | Info.                       |
| Acquisition SW | 6200 series TOF/6500 series |
| Version        | Q-TOF B.05.01 (B5125)       |

### Compound Table

| Compound Label          | RT    | Mass     | Formula          | MFG Formula      | MFG Diff (ppm) | DB Formula       |
|-------------------------|-------|----------|------------------|------------------|----------------|------------------|
| Cpd 4: C15 H12 Cl N3 O5 | 0.192 | 349.0469 | C15 H12 Cl N3 O5 | C15 H12 Cl N3 O5 | -0.89          | C15 H12 Cl N3 O5 |

| Compound Label          | m/z      | RT    | Algorithm                 | Mass     |
|-------------------------|----------|-------|---------------------------|----------|
| Cpd 4: C15 H12 Cl N3 O5 | 348.0397 | 0.192 | Find by Molecular Feature | 349.0469 |

### MFE MS Spectrum

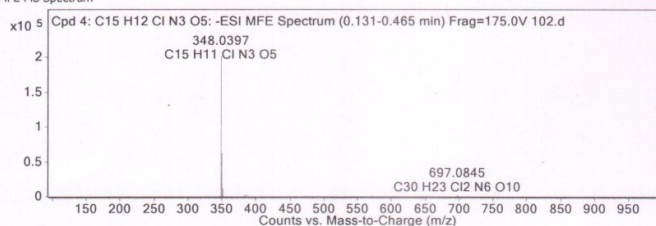

### MS Spectrum Peak List

| m/z      | z  | Abund     | Formula            | Ion     |
|----------|----|-----------|--------------------|---------|
| 348.0397 | -1 | 201861.14 | C15 H11 Cl N3 O5   | (M-H)-  |
| 349.0427 | -1 | 33345.25  | C15 H11 Cl N3 O5   | (M-H)-  |
| 350.0368 | -1 | 61505.89  | C15 H11 Cl N3 O5   | (M-H)-  |
| 351.0395 | -1 | 12166.55  | C15 H11 Cl N3 O5   | (M-H)-  |
| 352.042  | -1 | 1414.97   | C15 H11 Cl N3 O5   | (M-H)-  |
| 384.0156 | -1 | 2660.78   |                    | (M+Cl)- |
| 386.0129 | -1 | 2425.72   |                    | (M+Cl)- |
| 388.0127 | -1 | 621.48    |                    | (M+Cl)- |
| 697.0845 | -1 | 1456.21   | C30 H23 Cl2 N6 O10 | (2M-H)- |
| 699.0839 | -1 | 1001.25   | C30 H23 Cl2 N6 O10 | (2M-H)- |

### Predicted Isotope Match Table

| Isotope | m/z      | Calc m/z | Diff (ppm) | Abund % | Calc Abund % | Abund Sum % | Calc Abund Sum % |
|---------|----------|----------|------------|---------|--------------|-------------|------------------|
| 1       | 348.0397 | 348.0393 | -1.25      | 100     | 100          | 65.05       | 62.95            |
| 2       | 349.0427 | 349.0423 | -1.38      | 16.52   | 17.64        | 10.75       | 11.1             |
| 3       | 350.0368 | 350.0369 | 0.28       | 30.47   | 34.49        | 19.82       | 21.71            |
| 4       | 351.0395 | 351.0396 | 0.3        | 6.03    | 5.9          | 3.92        | 3.71             |
| 5       | 352.042  | 352.0418 | -0.75      | 0.7     | 0.82         | 0.46        | 0.52             |

--- End Of Report ---

<sup>1</sup>H NMR (400 MHz, CDCl<sub>3</sub>) of compound **7o**:

July30-2012-purnima  
Chloro-Dn-S

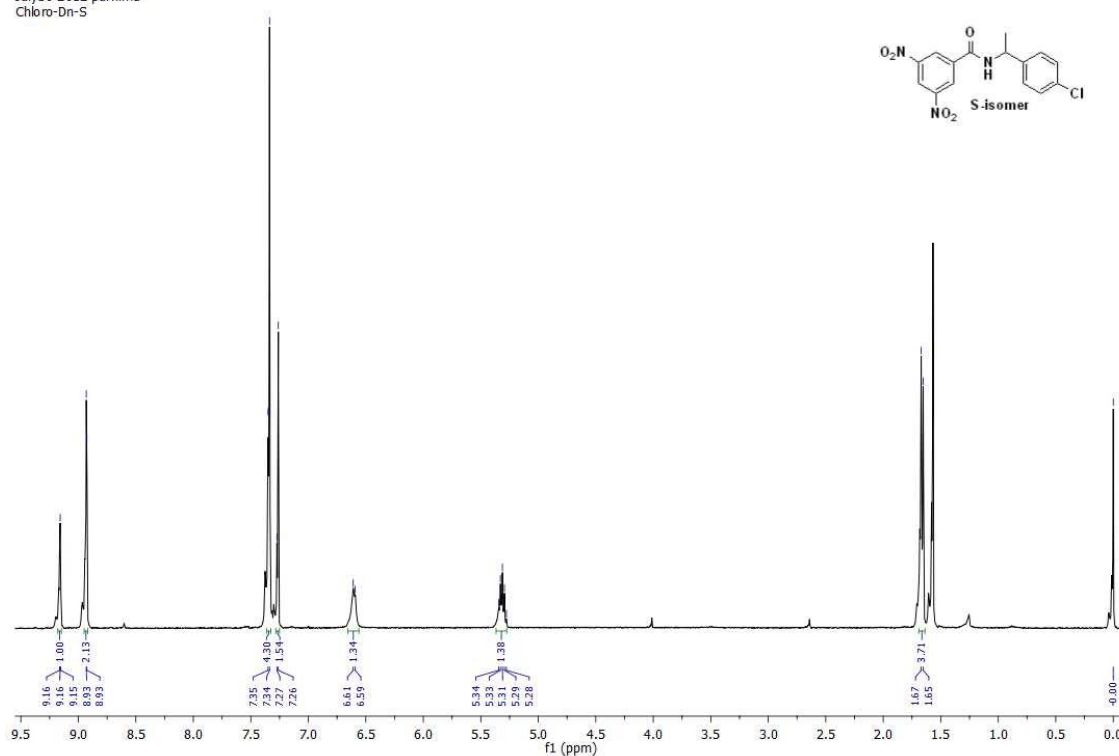

<sup>13</sup>C NMR (126 MHz, Acetone-d<sub>6</sub>) of compound **7o**:

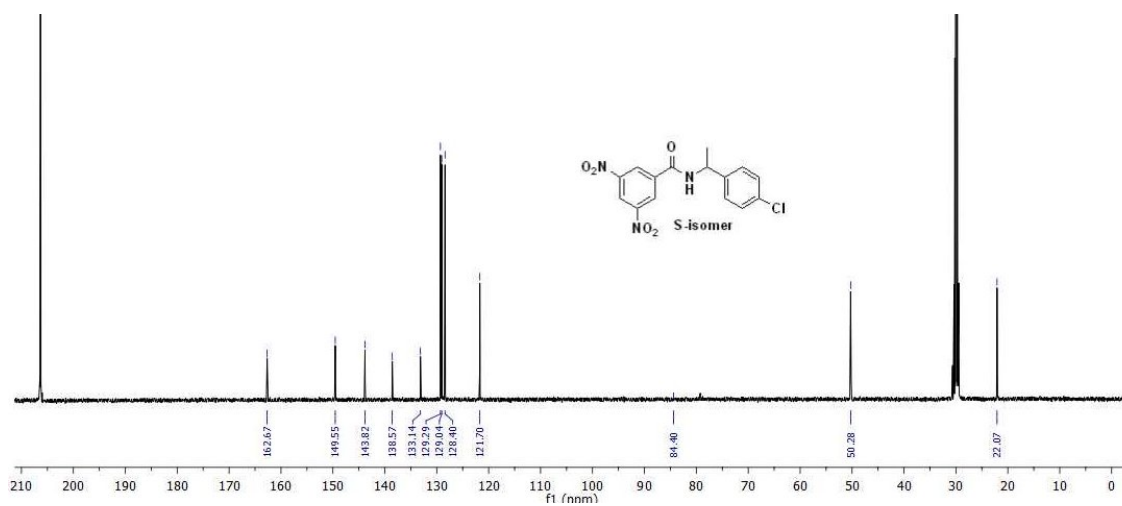

DEPT (126 MHz, Acetone-d<sub>6</sub>) of compound **7o**:

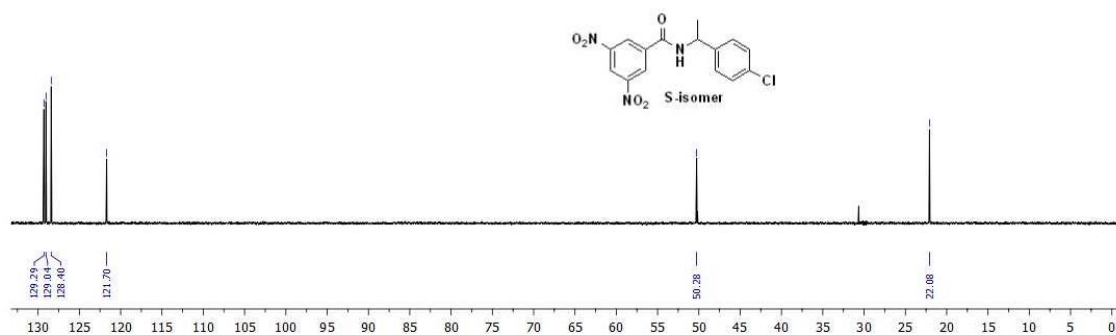

HRMS (ESI-TOF) of compound **7o**:



## Qualitative Compound Report

|                               |                      |                      |                        |
|-------------------------------|----------------------|----------------------|------------------------|
| <b>Data File</b>              | 103.d                | <b>Sample Name</b>   | 103                    |
| <b>Sample Type</b>            | Sample               | <b>Position</b>      | Vial 31                |
| <b>Instrument Name</b>        | Instrument 1         | <b>User Name</b>     |                        |
| <b>Acq Method</b>             | vishal_neg12-01-13.m | <b>Acquired Time</b> | 07-03-2013 PM 5:47:34  |
| <b>IRM Calibration Status</b> | Success              | <b>DA Method</b>     | SamplePurity-Default.m |
| <b>Comment</b>                |                      |                      |                        |

  

|                       |                             |              |  |
|-----------------------|-----------------------------|--------------|--|
| <b>Sample Group</b>   |                             | <b>Info.</b> |  |
| <b>Acquisition SW</b> | 6200 series TOF/6500 series |              |  |
| <b>Version</b>        | Q-TOF B.05.01 (B5125)       |              |  |

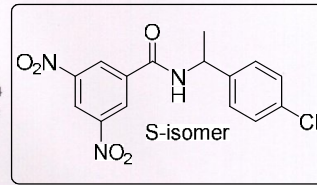

### Compound Table

| Compound Label           | RT    | Mass    | Formula          | MFG Formula      | MFG Diff (ppm) | DB Formula       |
|--------------------------|-------|---------|------------------|------------------|----------------|------------------|
| Cpd 15: C15 H12 Cl N3 O5 | 0.187 | 349.047 | C15 H12 Cl N3 O5 | C15 H12 Cl N3 O5 | -1.31          | C15 H12 Cl N3 O5 |

| Compound Label           | m/z      | RT    | Algorithm                 | Mass    |
|--------------------------|----------|-------|---------------------------|---------|
| Cpd 15: C15 H12 Cl N3 O5 | 348.0398 | 0.187 | Find by Molecular Feature | 349.047 |

### MFE MS Spectrum

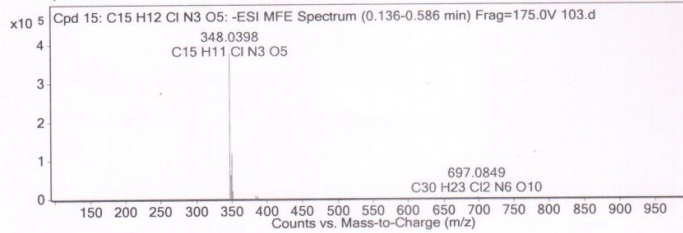

### MS Spectrum Peak List

| m/z      | z  | Abund     | Formula            | Ion     |
|----------|----|-----------|--------------------|---------|
| 348.0398 | -1 | 378520.44 | C15 H11 Cl N3 O5   | (M-H)-  |
| 349.0427 | -1 | 63744.54  | C15 H11 Cl N3 O5   | (M-H)-  |
| 350.0372 | -1 | 117417.26 | C15 H11 Cl N3 O5   | (M-H)-  |
| 351.0398 | -1 | 20543.47  | C15 H11 Cl N3 O5   | (M-H)-  |
| 352.0418 | -1 | 2998.3    | C15 H11 Cl N3 O5   | (M-H)-  |
| 384.0158 | -1 | 8605.59   | C15 H12 Cl2 N3 O5  | (M+Cl)- |
| 385.0204 | -1 | 1134.21   | C15 H12 Cl2 N3 O5  | (M+Cl)- |
| 386.0134 | -1 | 6084.28   | C15 H12 Cl2 N3 O5  | (M+Cl)- |
| 697.0849 | -1 | 2429.62   | C30 H23 Cl2 N6 O10 | (2M-H)- |
| 699.0807 | -1 | 1937.37   | C30 H23 Cl2 N6 O10 | (2M-H)- |

### Predicted Isotope Match Table

| Isotope | m/z      | Calc m/z | Diff (ppm) | Abund % | Calc Abund % | Abund Sum % | Calc Abund Sum % |
|---------|----------|----------|------------|---------|--------------|-------------|------------------|
| 1       | 348.0398 | 348.0393 | -1.57      | 100     | 100          | 64.86       | 62.92            |
| 2       | 349.0427 | 349.0423 | -1.26      | 16.84   | 17.64        | 10.92       | 11.1             |
| 3       | 350.0372 | 350.0369 | -0.7       | 31.02   | 34.49        | 20.12       | 21.7             |
| 4       | 351.0398 | 351.0396 | -0.42      | 5.43    | 5.9          | 3.52        | 3.71             |
| 5       | 352.0418 | 352.0418 | 0          | 0.79    | 0.82         | 0.51        | 0.52             |
| 6       | 353.0418 | 353.0442 | 6.89       | 0.09    | 0.08         | 0.06        | 0.05             |

--- End Of Report ---

<sup>1</sup>H NMR (400 MHz, CDCl<sub>3</sub>) of compound **7p**:

July 30-2012-purnima  
OME-DNB-R

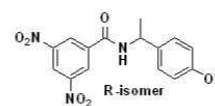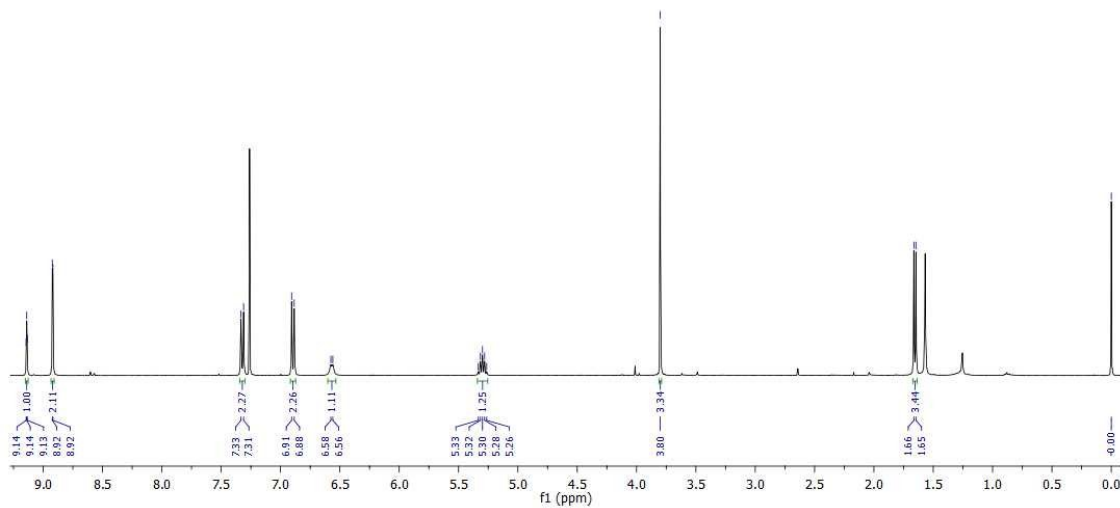

<sup>13</sup>C NMR (126 MHz, Acetone-d<sub>6</sub>) of compound 7p:

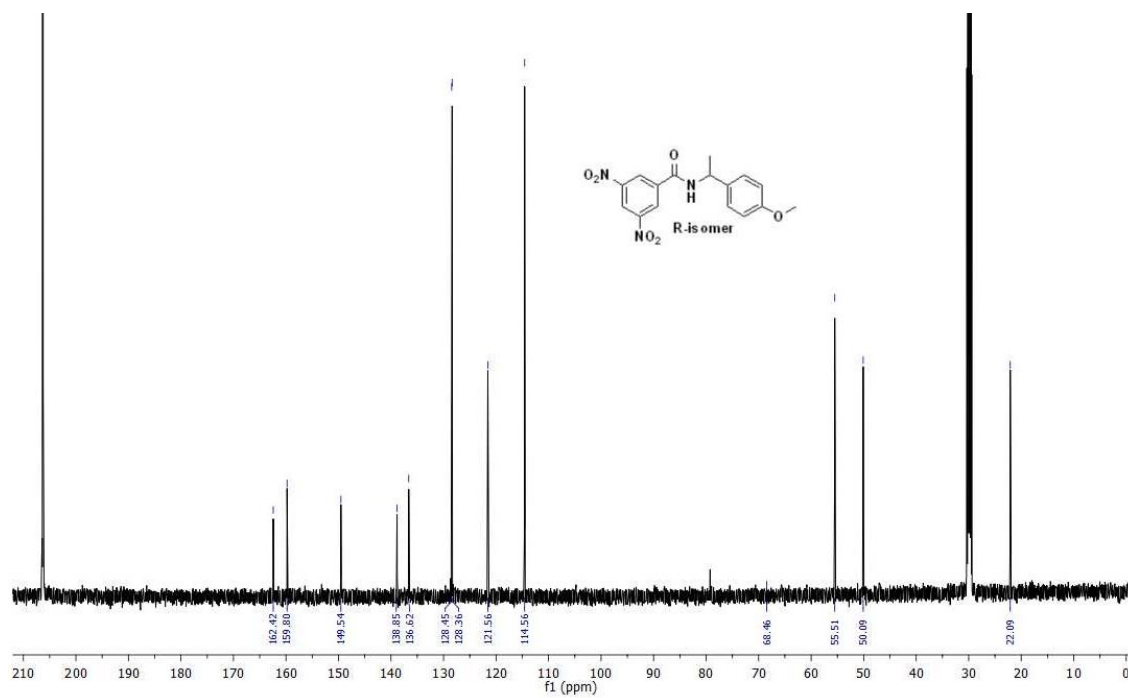

DEPT (126 MHz, Acetone-d<sub>6</sub>) of compound **7p**:

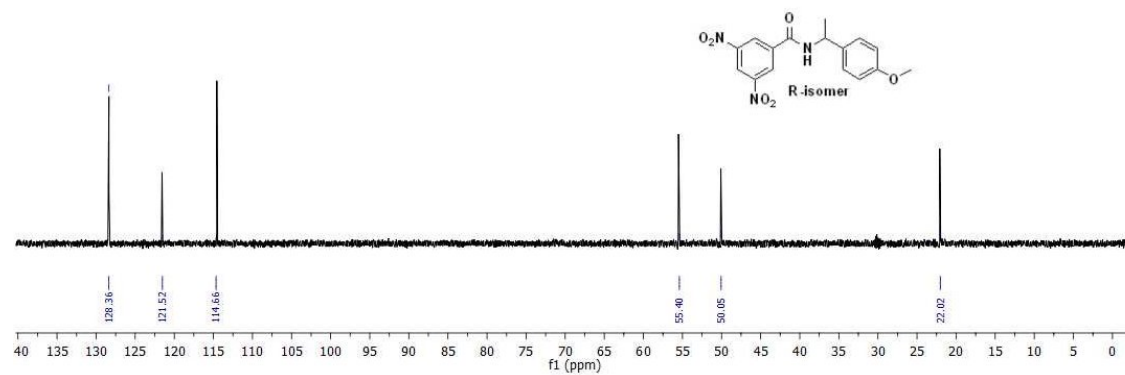

HRMS (ESI-TOF) of compound 7p:

Qualitative Compound Report

Data File: 104.d Sample Name: 104  
 Sample Type: Sample Position: Vial 32  
 Instrument Name: Instrument 1 User Name:  
 Acq Method: vishal\_neg12-01-13.m Acquired Time: 07-03-2013 PM 5:56:39  
 IRM Calibration Status: Success DA Method: SamplePurity-Default.m  
 Comment:

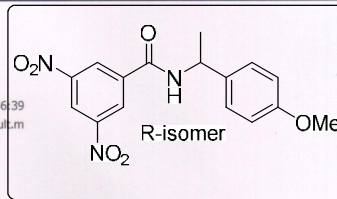

Sample Group: Info.  
 Acquisition SW: 6200 series TOF/6500 series  
 Version: Q-TOF B.05.01 (B5125)

Compound Table

| Compound Label       | RT    | Mass     | Formula       | MFG Formula   | MFG Diff (ppm) | DB Formula    |
|----------------------|-------|----------|---------------|---------------|----------------|---------------|
| Cpd 6: C16 H15 N3 O6 | 0.186 | 345.0966 | C16 H15 N3 O6 | C16 H15 N3 O6 | -1.37          | C16 H15 N3 O6 |

| Compound Label       | m/z      | RT    | Algorithm                 | Mass     |
|----------------------|----------|-------|---------------------------|----------|
| Cpd 6: C16 H15 N3 O6 | 344.0893 | 0.186 | Find by Molecular Feature | 345.0966 |

MFE MS Spectrum

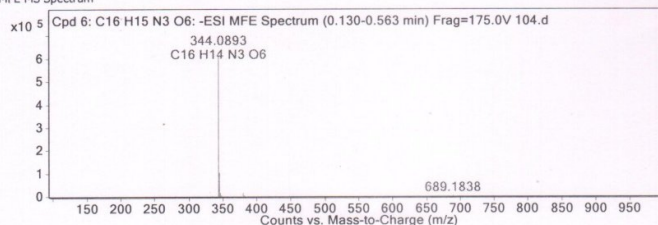

MS Spectrum Peak List

| m/z      | z  | Abund     | Formula          | Ion     |
|----------|----|-----------|------------------|---------|
| 344.0893 | -1 | 610876.81 | C16 H14 N3 O6    | (M-H)-  |
| 345.0921 | -1 | 101181.52 | C16 H14 N3 O6    | (M-H)-  |
| 346.0941 | -1 | 15975.81  | C16 H14 N3 O6    | (M-H)-  |
| 347.098  | -1 | 2230.59   | C16 H14 N3 O6    | (M-H)-  |
| 380.065  | -1 | 13910.89  | C16 H15 Cl N3 O6 | (M+Cl)- |
| 381.0689 | -1 | 2725.07   | C16 H15 Cl N3 O6 | (M+Cl)- |
| 382.0634 | -1 | 5227.45   | C16 H15 Cl N3 O6 | (M+Cl)- |
| 383.0651 | -1 | 899.7     | C16 H15 Cl N3 O6 | (M+Cl)- |
| 689.1838 | -1 | 2441.67   |                  | (2M-H)- |
| 690.1868 | -1 | 1336.17   |                  | (2M-H)- |

Predicted Isotope Match Table

| Isotope | m/z      | Calc m/z | Diff (ppm) | Abund % | Calc Abund % | Abund Sum % | Calc Abund Sum % |
|---------|----------|----------|------------|---------|--------------|-------------|------------------|
| 1       | 344.0893 | 344.0888 | -1.48      | 100     | 100          | 83.65       | 81.96            |
| 2       | 345.0921 | 345.0918 | -0.92      | 16.56   | 18.79        | 13.86       | 15.4             |
| 3       | 346.0941 | 346.0941 | 0.02       | 2.62    | 2.9          | 2.19        | 2.38             |
| 4       | 347.098  | 347.0966 | -3.98      | 0.37    | 0.32         | 0.31        | 0.27             |

--- End Of Report ---

$^1\text{H}$  NMR (400 MHz,  $\text{CDCl}_3$ ) of compound **7q**:

July30-2012-purnima  
Methoxy-Dn-s

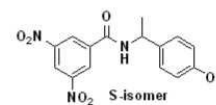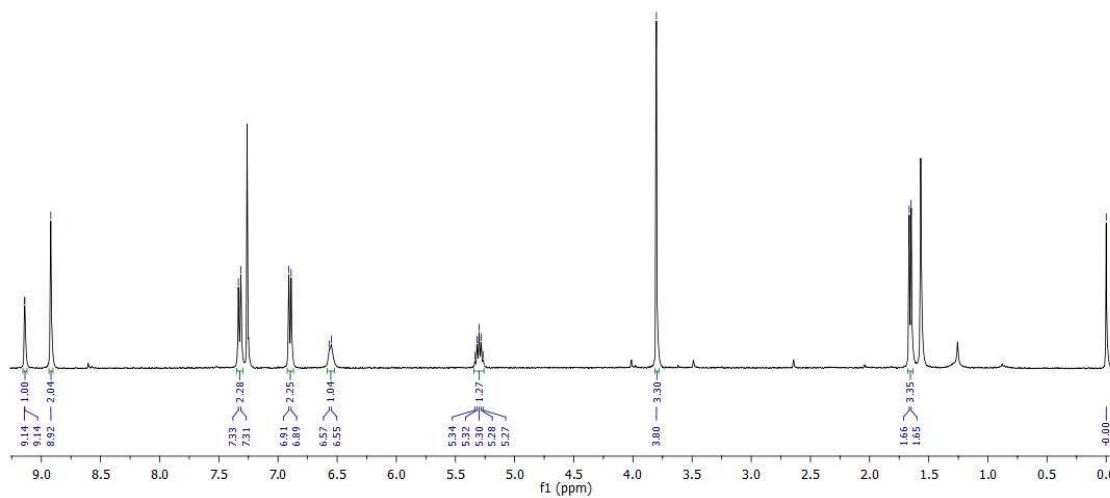

$^{13}\text{C}$  NMR (126 MHz,  $\text{Acetone-d}_6$ ) of compound **7q**:

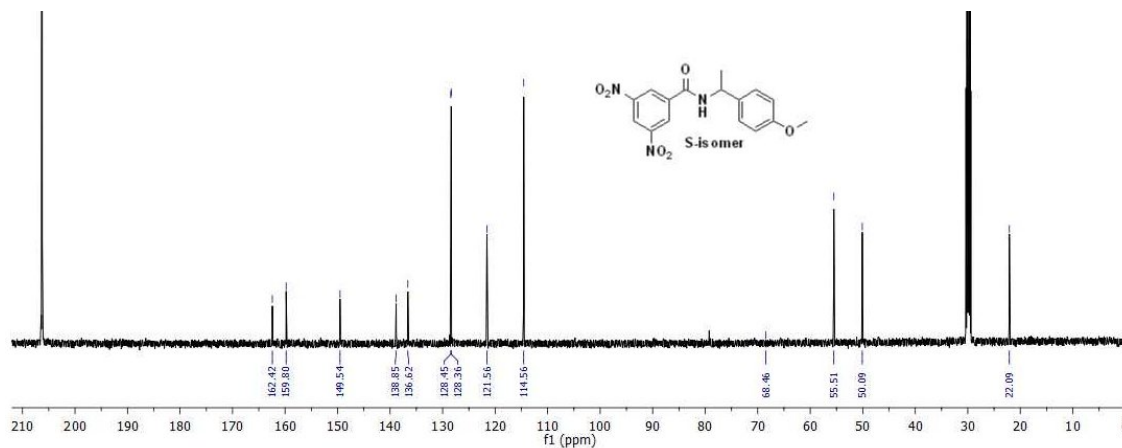

DEPT (126 MHz, Acetone-d<sub>6</sub>) of compound **7q**:

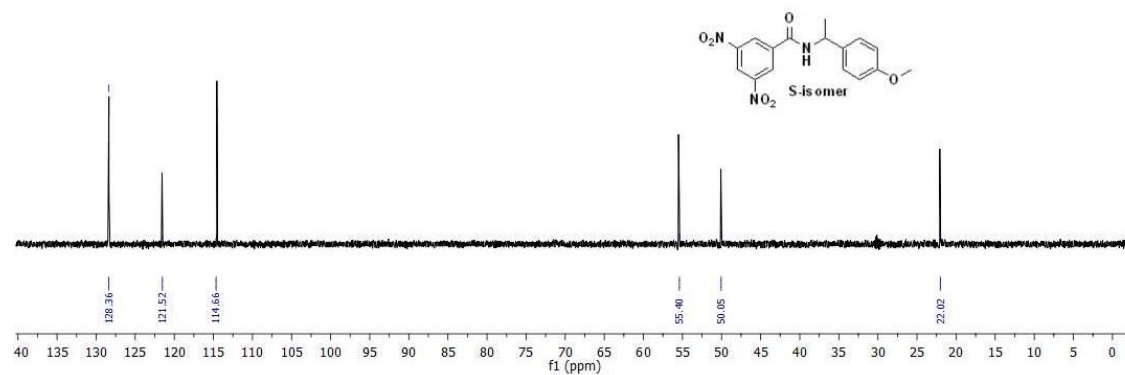

HRMS (ESI-TOF) of compound 7q:

Qualitative Compound Report

Data File: 105.d  
 Sample Type: Sample  
 Instrument Name: Instrument 1  
 Acq Method: vishal\_neg12-01-13.m  
 IRM Calibration Status: Success  
 Comment:

Sample Name: 105  
 Position: Vial 33  
 User Name:  
 Acquired Time: 07-03-2013 PM 6:01:12  
 DA Method: SamplePurity-Default.m

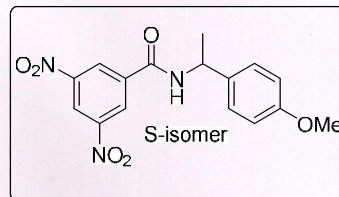

Sample Group Info.  
 Acquisition SW: 6200 series TOF/6500 series  
 Version: Q-TOF B.05.01 (B5125)

Compound Table

| Compound Label        | RT    | Mass     | Formula       | MFG Formula   | MFG Diff (ppm) | DB Formula    |
|-----------------------|-------|----------|---------------|---------------|----------------|---------------|
| Cpd 10: C16 H15 N3 O6 | 0.187 | 345.0965 | C16 H15 N3 O6 | C16 H15 N3 O6 | -1.14          | C16 H15 N3 O6 |

| Compound Label        | m/z      | RT    | Algorithm                 | Mass     |
|-----------------------|----------|-------|---------------------------|----------|
| Cpd 10: C16 H15 N3 O6 | 344.0892 | 0.187 | Find by Molecular Feature | 345.0965 |

MFE MS Spectrum

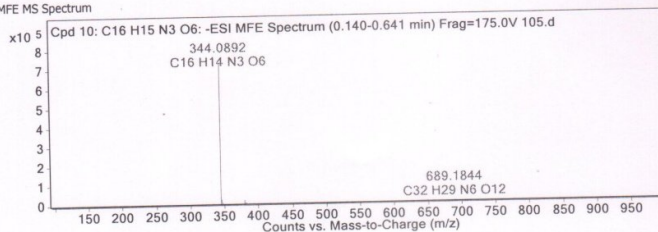

MS Spectrum Peak List

| m/z      | z  | Abund     | Formula          | Ion     |
|----------|----|-----------|------------------|---------|
| 344.0892 | -1 | 725897.63 | C16 H14 N3 O6    | (M-H)-  |
| 345.0923 | -1 | 126956.16 | C16 H14 N3 O6    | (M-H)-  |
| 346.0948 | -1 | 22641.56  | C16 H14 N3 O6    | (M-H)-  |
| 347.0964 | -1 | 2493.41   | C16 H14 N3 O6    | (M-H)-  |
| 380.0654 | -1 | 16197.67  | C16 H15 Cl N3 O6 | (M+Cl)- |
| 381.0691 | -1 | 3416.3    | C16 H15 Cl N3 O6 | (M+Cl)- |
| 382.0635 | -1 | 5541.72   | C16 H15 Cl N3 O6 | (M+Cl)- |
| 689.1844 | -1 | 3976.8    | C32 H29 N6 O12   | (2M-H)- |
| 690.1833 | -1 | 1040.4    | C32 H29 N6 O12   | (2M-H)- |
| 691.1907 | -1 | 466.38    | C32 H29 N6 O12   | (2M-H)- |

Predicted Isotope Match Table

| Isotope | m/z      | Calc m/z | Diff (ppm) | Abund % | Calc Abund % | Abund Sum % | Calc Abund Sum % |
|---------|----------|----------|------------|---------|--------------|-------------|------------------|
| 1       | 344.0892 | 344.0888 | -1.08      | 100     | 100          | 82.68       | 81.96            |
| 2       | 345.0923 | 345.0918 | -1.4       | 17.49   | 18.79        | 14.46       | 15.4             |
| 3       | 346.0948 | 346.0941 | -2.08      | 3.12    | 2.9          | 2.58        | 2.38             |
| 4       | 347.0964 | 347.0966 | 0.48       | 0.34    | 0.32         | 0.28        | 0.27             |

--- End Of Report ---

$^1\text{H}$  NMR (400 MHz,  $\text{CDCl}_3$ ) of compound **7r**:

May24-2012-pumima  
R-PHENYL ETHYL

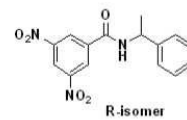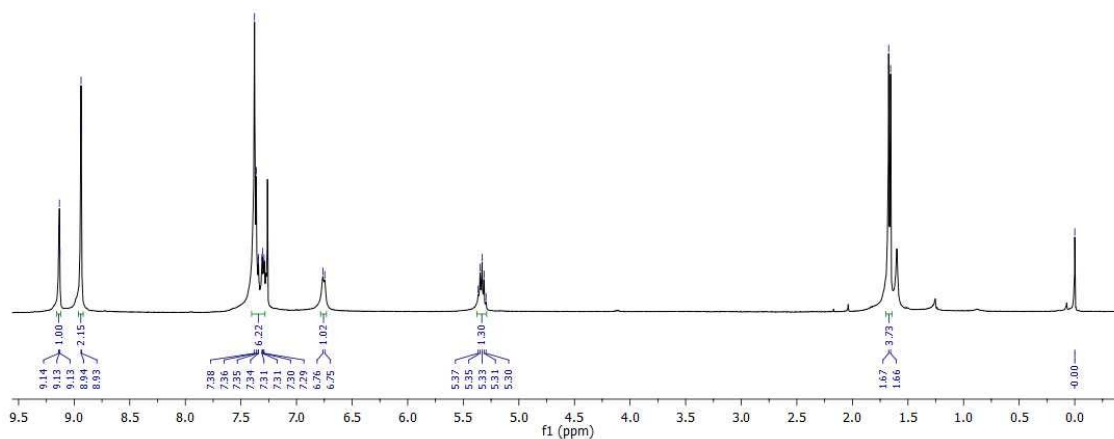

$^{13}\text{C}$  NMR (126 MHz,  $\text{Acetone-d}_6$ ) of compound **7r**:

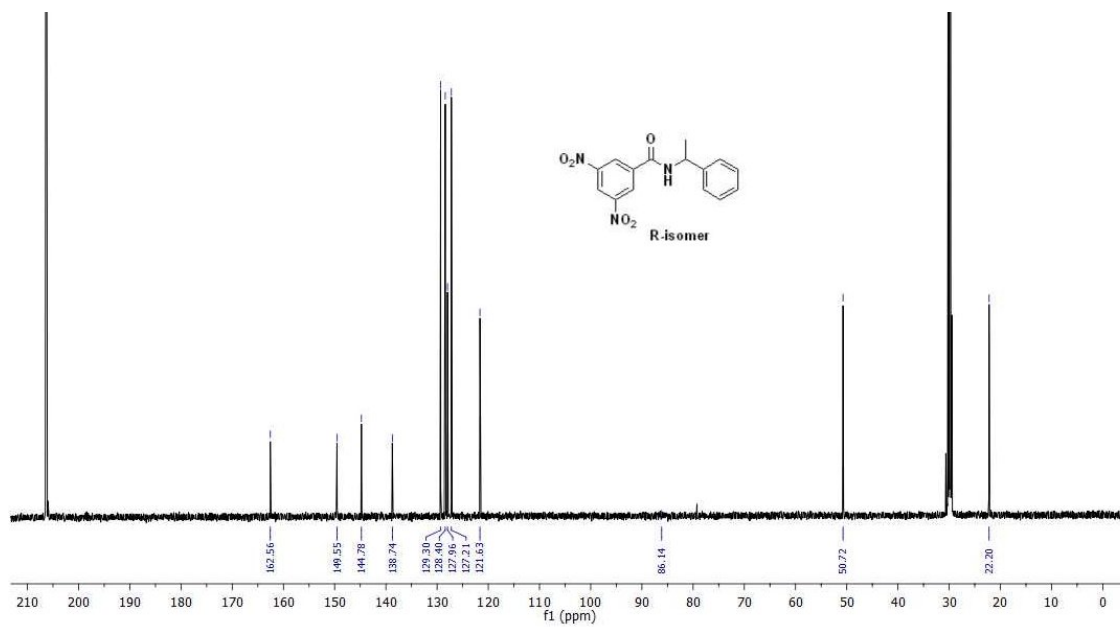



DEPT (126 MHz, Acetone-d<sub>6</sub>) of compound **7r**:

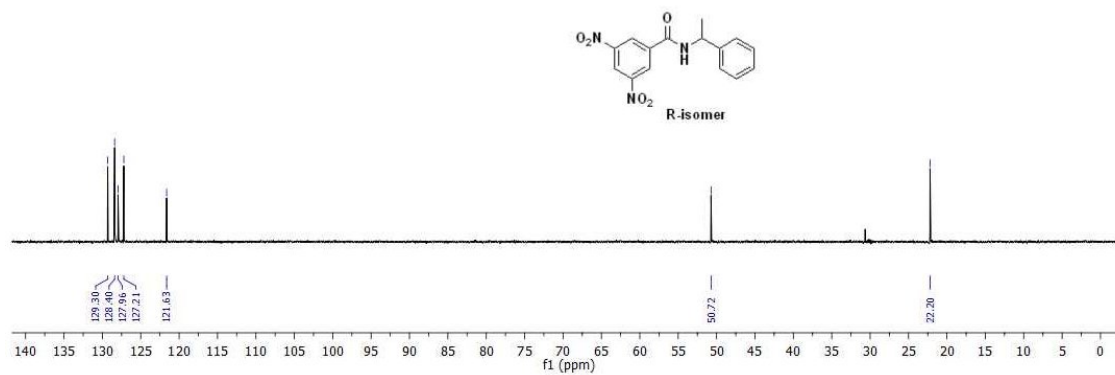

HRMS (ESI-TOF) of compound **7r**:

**Qualitative Compound Report**

|                               |                                                   |                      |                        |
|-------------------------------|---------------------------------------------------|----------------------|------------------------|
| <b>Data File</b>              | 55.d                                              | <b>Sample Name</b>   | 55                     |
| <b>Sample Type</b>            | Sample                                            | <b>Position</b>      | Vial 20                |
| <b>Instrument Name</b>        | Instrument 1                                      | <b>User Name</b>     |                        |
| <b>Acq Method</b>             | vishal_neg12-01-13.m                              | <b>Acquired Time</b> | 04-03-2013 PM 3:36:48  |
| <b>IRM Calibration Status</b> | Success                                           | <b>DA Method</b>     | SamplePurity-Default.m |
| <b>Comment</b>                |                                                   |                      |                        |
| <b>Sample Group</b>           |                                                   | <b>Info.</b>         |                        |
| <b>Acquisition SW Version</b> | 6200 series TOF/6500 series Q-TOF B.05.01 (B5125) |                      |                        |

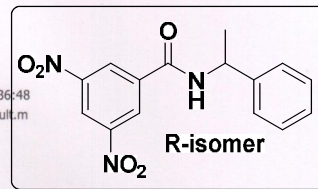

**Compound Table**

| Compound Label       | RT    | Mass    | Formula       | MFG Formula   | MFG Diff (ppm) | DB Formula    |
|----------------------|-------|---------|---------------|---------------|----------------|---------------|
| Cpd 1: C15 H13 N3 O5 | 0.191 | 315.086 | C15 H13 N3 O5 | C15 H13 N3 O5 | -1.45          | C15 H13 N3 O5 |

| Compound Label       | m/z      | RT    | Algorithm                 | Mass    |
|----------------------|----------|-------|---------------------------|---------|
| Cpd 1: C15 H13 N3 O5 | 314.0787 | 0.191 | Find by Molecular Feature | 315.086 |

**MFE MS Spectrum**

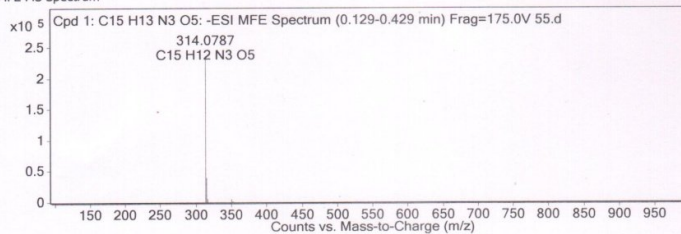

**MS Spectrum Peak List**

| m/z      | z  | Abund     | Formula          | Ion     |
|----------|----|-----------|------------------|---------|
| 314.0787 | -1 | 235398.56 | C15 H12 N3 O5    | (M-H)-  |
| 315.0818 | -1 | 39925.2   | C15 H12 N3 O5    | (M-H)-  |
| 316.0844 | -1 | 6107.2    | C15 H12 N3 O5    | (M-H)-  |
| 317.0857 | -1 | 973.96    | C15 H12 N3 O5    | (M-H)-  |
| 350.0547 | -1 | 4522.35   | C15 H13 Cl N3 O5 | (M+Cl)- |
| 351.057  | -1 | 1052.76   | C15 H13 Cl N3 O5 | (M+Cl)- |
| 352.053  | -1 | 1212.6    | C15 H13 Cl N3 O5 | (M+Cl)- |

**Predicted Isotope Match Table**

| Isotope | m/z      | Calc m/z | Diff (ppm) | Abund % | Calc Abund % | Abund Sum % | Calc Abund Sum % |
|---------|----------|----------|------------|---------|--------------|-------------|------------------|
| 1       | 314.0787 | 314.0782 | -1.38      | 100     | 100          | 83.35       | 83.06            |
| 2       | 315.0818 | 315.0812 | -1.77      | 16.96   | 17.65        | 14.14       | 14.66            |
| 3       | 316.0844 | 316.0835 | -2.7       | 2.59    | 2.49         | 2.16        | 2.07             |
| 4       | 317.0857 | 317.086  | 0.93       | 0.41    | 0.26         | 0.34        | 0.21             |

--- End Of Report ---

$^1\text{H}$  NMR (400 MHz,  $\text{CDCl}_3$ ) of compound **7s**:

May24-2012-pumima  
S-PHENYL DNB

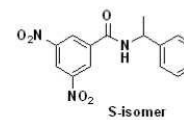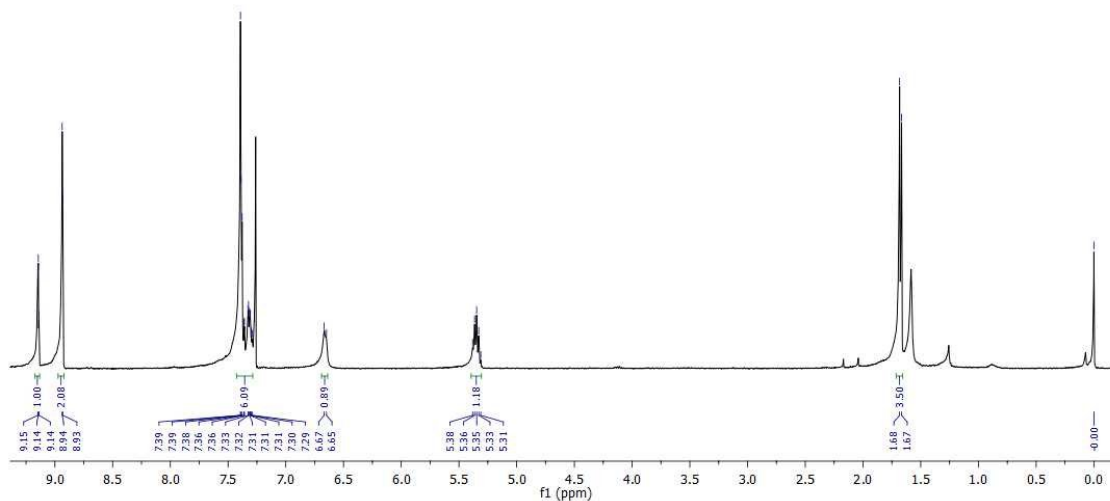

$^{13}\text{C}$  NMR (126 MHz,  $\text{Acetone-d}_6$ ) of compound **7s**:

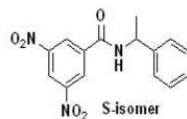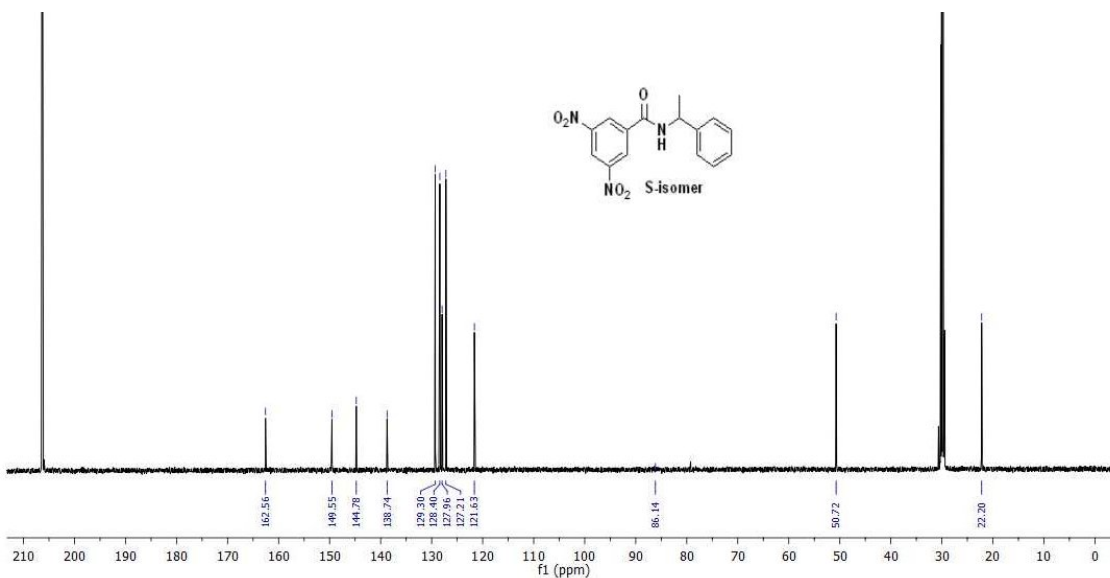

DEPT (126 MHz, Acetone-d<sub>6</sub>) of compound **7s**:

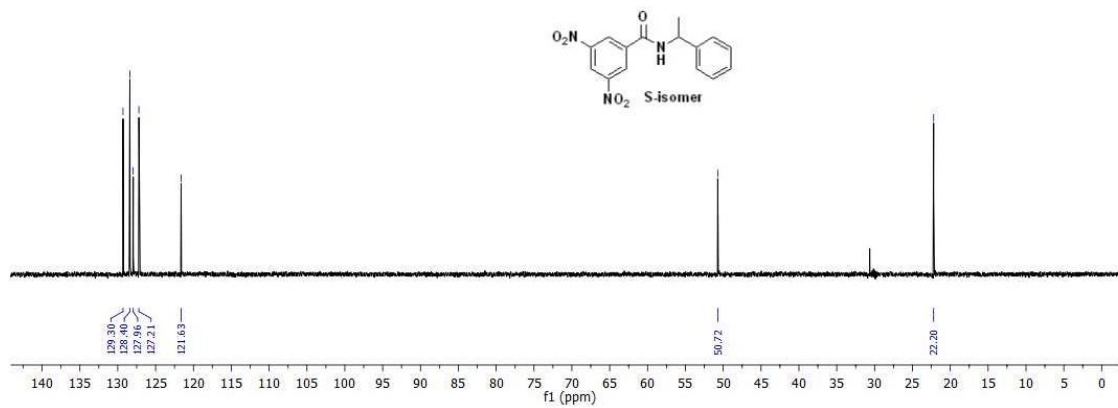

HRMS (ESI-TOF) of compound 7s:

Qualitative Compound Report

Data File: 56.d  
 Sample Type: Sample  
 Instrument Name: Instrument 1  
 Acq Method: vishal\_neg12-01-13.m  
 IRM Calibration Status: Success  
 Comment:  
 Sample Group: Info.  
 Acquisition SW: 6200 series TOF/6500 series  
 Version: Q-TOF B.05.01 (B5125)

Sample Name: 56  
 Position: Vial 21  
 User Name:  
 Acquired Time: 04-03-2013 PM 3:41:18  
 DA Method: SamplePurity-Default.m

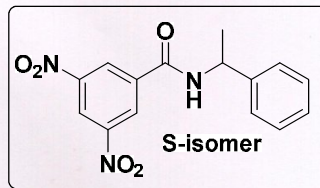

| Compound Label       | RT    | Mass     | Formula       | MFG Formula   | MFG Diff (ppm) | DB Formula    |
|----------------------|-------|----------|---------------|---------------|----------------|---------------|
| Cpd 3: C15 H13 N3 O5 | 0.194 | 315.0855 | C15 H13 N3 O5 | C15 H13 N3 O5 | 0.03           | C15 H13 N3 O5 |

| Compound Label       | m/z      | RT    | Algorithm                 | Mass     |
|----------------------|----------|-------|---------------------------|----------|
| Cpd 3: C15 H13 N3 O5 | 314.0782 | 0.194 | Find by Molecular Feature | 315.0855 |

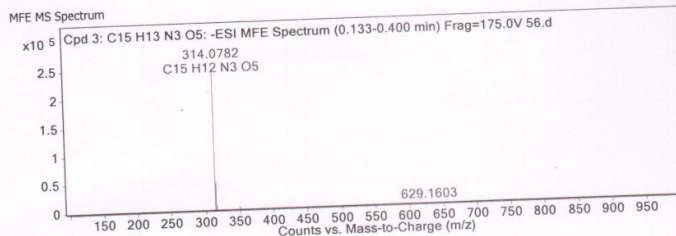

MS Spectrum Peak List

| m/z      | z  | Abund     | Formula          | Ion     |
|----------|----|-----------|------------------|---------|
| 314.0782 | -1 | 248029.78 | C15 H12 N3 O5    | (M-H)-  |
| 315.0813 | -1 | 47317     | C15 H12 N3 O5    | (M-H)-  |
| 316.0831 | -1 | 7160.78   | C15 H12 N3 O5    | (M-H)-  |
| 317.0886 | -1 | 803.45    | C15 H12 N3 O5    | (M-H)-  |
| 350.0542 | -1 | 4100.91   | C15 H13 Cl N3 O5 | (M+Cl)- |
| 351.0565 | -1 | 738.83    | C15 H13 Cl N3 O5 | (M+Cl)- |
| 352.0505 | -1 | 1277.92   | C15 H13 Cl N3 O5 | (M+Cl)- |
| 629.1603 | -1 | 392.7     |                  | (2M-H)- |

Predicted Isotope Match Table

| Isotope | m/z      | Calc m/z | Diff (ppm) | Abund % | Calc Abund % | Abund Sum % | Calc Abund Sum % |
|---------|----------|----------|------------|---------|--------------|-------------|------------------|
| 1       | 314.0782 | 314.0782 | 0.03       | 100     | 100          | 81.77       | 83.06            |
| 2       | 315.0813 | 315.0812 | -0.05      | 19.08   | 17.65        | 15.6        | 14.66            |
| 3       | 316.0831 | 316.0835 | 1.33       | 2.89    | 2.49         | 2.36        | 2.07             |
| 4       | 317.0886 | 317.086  | -8.14      | 0.32    | 0.26         | 0.26        | 0.21             |

--- End Of Report ---

<sup>1</sup>H NMR (400 MHz, CDCl<sub>3</sub>) of compound **7t**:

Desktop  
Ethyl-R-DNB

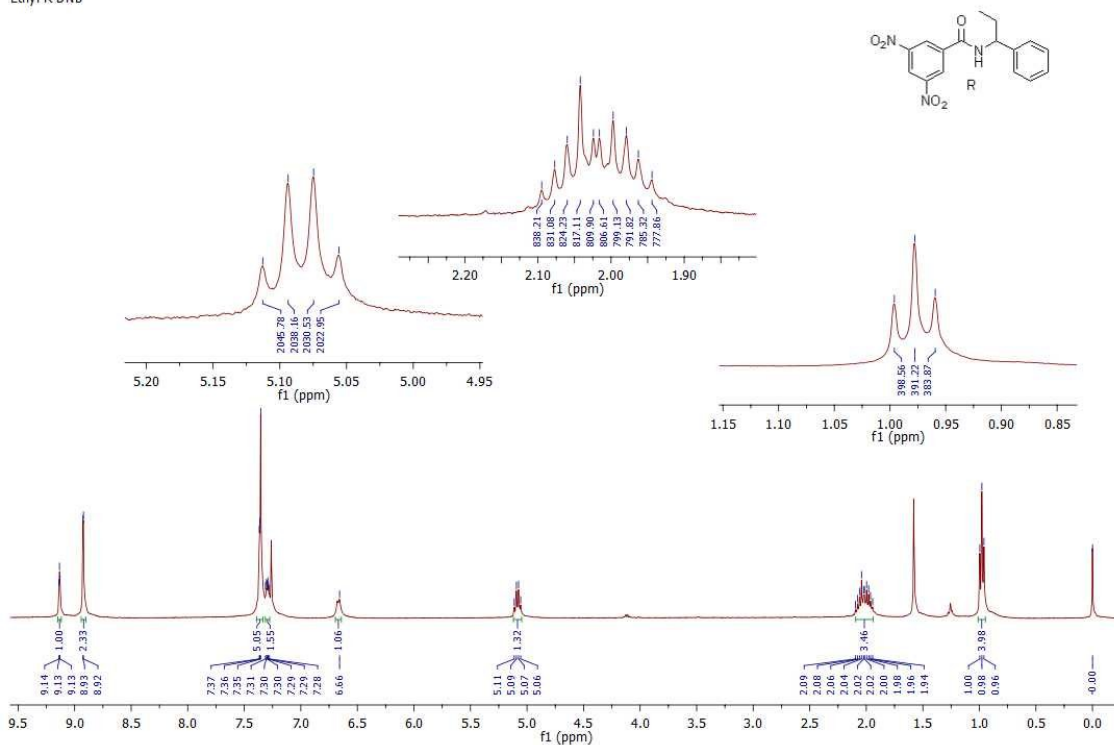

<sup>13</sup>C NMR (101 MHz, Acetone-d<sub>6</sub>) of compound **7t**:

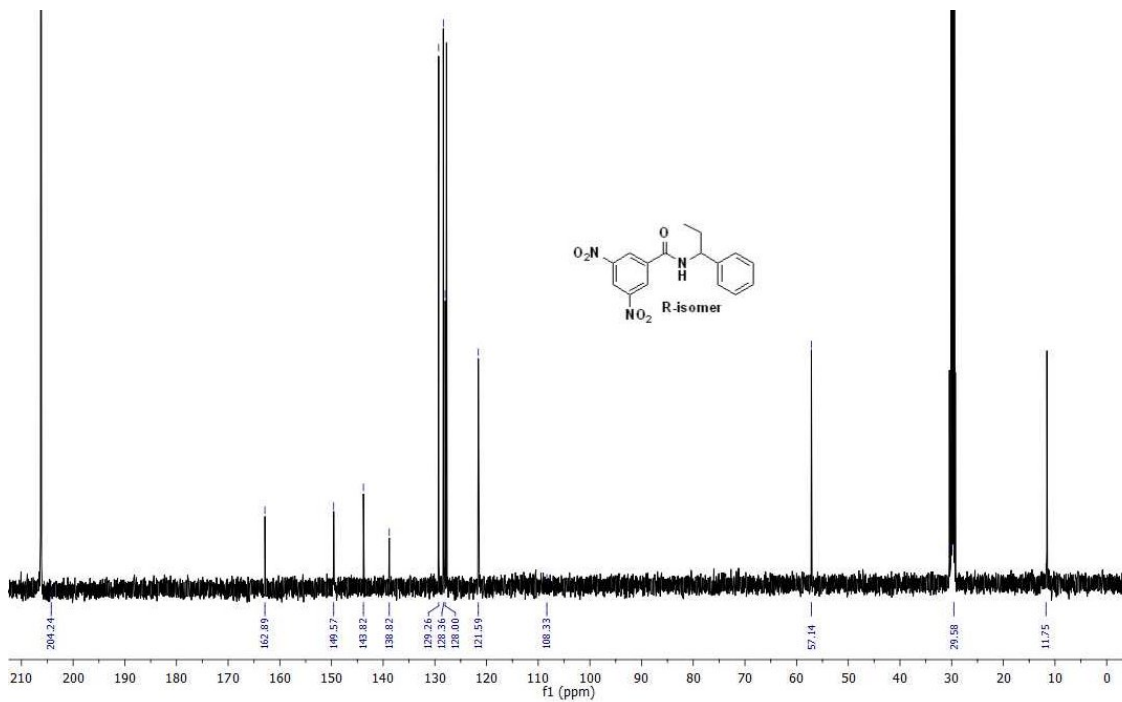

DEPT (101 MHz, Acetone-d<sub>6</sub>) of compound **7t**:

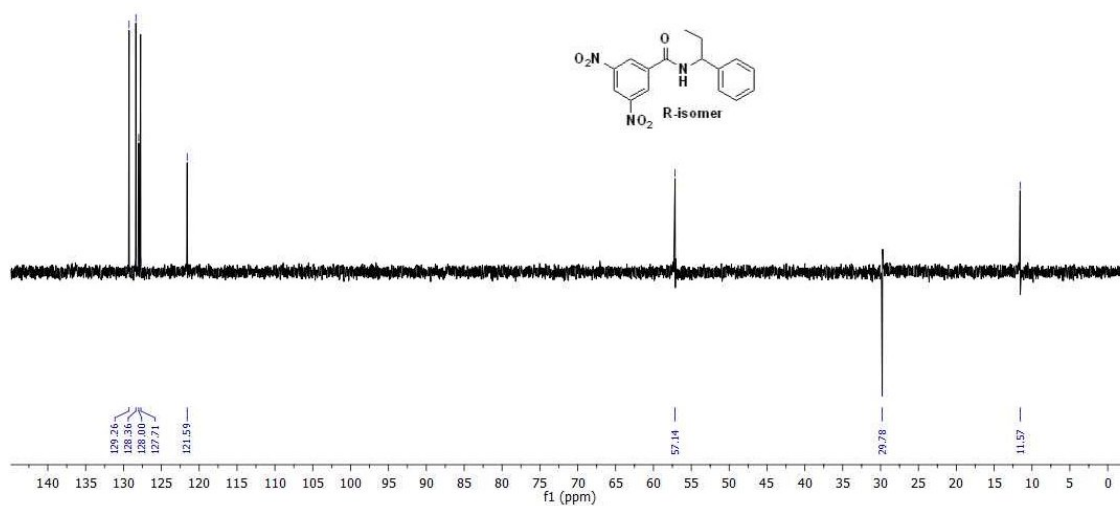

HRMS (ESI-TOF) of compound 7t:

Qualitative Compound Report

Data File: 91.d Sample Name: 91  
 Sample Type: Sample Position: Vial 17  
 Instrument Name: Instrument 1 User Name:  
 Acq Method: vishal\_neg12-01-13.m Acquired Time: 06-03-2013 PM 5:05:10  
 IRM Calibration Status: Success DA Method: SamplePurity-Default.m  
 Comment:

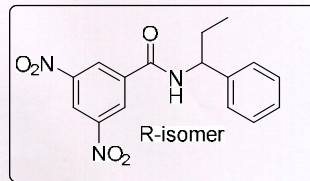

Sample Group: Info.  
 Acquisition SW: 6200 series TOF/6500 series  
 Version: Q-TOF B.05.01 (B5125)

Compound Table

| Compound Label       | RT    | Mass     | Formula       | MFG Formula   | MFG Diff (ppm) | DB Formula    |
|----------------------|-------|----------|---------------|---------------|----------------|---------------|
| Cpd 4: C16 H15 N3 O5 | 0.195 | 329.1012 | C16 H15 N3 O5 | C16 H15 N3 O5 | -0.1           | C16 H15 N3 O5 |

| Compound Label       | m/z      | RT    | Algorithm                 | Mass     |
|----------------------|----------|-------|---------------------------|----------|
| Cpd 4: C16 H15 N3 O5 | 328.0939 | 0.195 | Find by Molecular Feature | 329.1012 |

MFE MS Spectrum

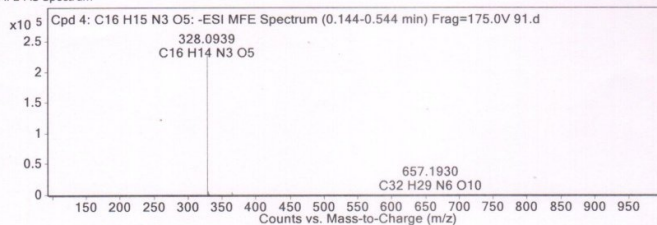

MS Spectrum Peak List

| m/z      | z  | Abund    | Formula        | Ion     |
|----------|----|----------|----------------|---------|
| 328.0939 | -1 | 228341.8 | C16 H14 N3 O5  | (M-H)-  |
| 329.0971 | -1 | 38304.57 | C16 H14 N3 O5  | (M-H)-  |
| 330.099  | -1 | 5622.65  | C16 H14 N3 O5  | (M-H)-  |
| 331.1008 | -1 | 908.66   | C16 H14 N3 O5  | (M-H)-  |
| 364.0702 | -1 | 3475.63  |                | (M+Cl)- |
| 365.0717 | -1 | 1136.71  |                | (M+Cl)- |
| 366.0661 | -1 | 1777.39  |                | (M+Cl)- |
| 657.193  | -1 | 350.78   | C32 H29 N6 O10 | (2M-H)- |

Predicted Isotope Match Table

| Isotope | m/z      | Calc m/z | Diff (ppm) | Abund % | Calc Abund % | Abund Sum % | Calc Abund Sum % |
|---------|----------|----------|------------|---------|--------------|-------------|------------------|
| 1       | 328.0939 | 328.0939 | -0.07      | 100     | 100          | 83.59       | 82.15            |
| 2       | 329.0971 | 329.0969 | -0.49      | 16.78   | 18.75        | 14.02       | 15.41            |
| 3       | 330.099  | 330.0992 | 0.84       | 2.46    | 2.69         | 2.06        | 2.21             |
| 4       | 331.1008 | 331.1017 | 2.84       | 0.4     | 0.28         | 0.33        | 0.23             |

--- End Of Report ---



# <sup>1</sup>H NMR (400 MHz, CDCl<sub>3</sub>) of compound **7u**:

Aug-07-2012-MCD-1  
S-Ethyl-DNB

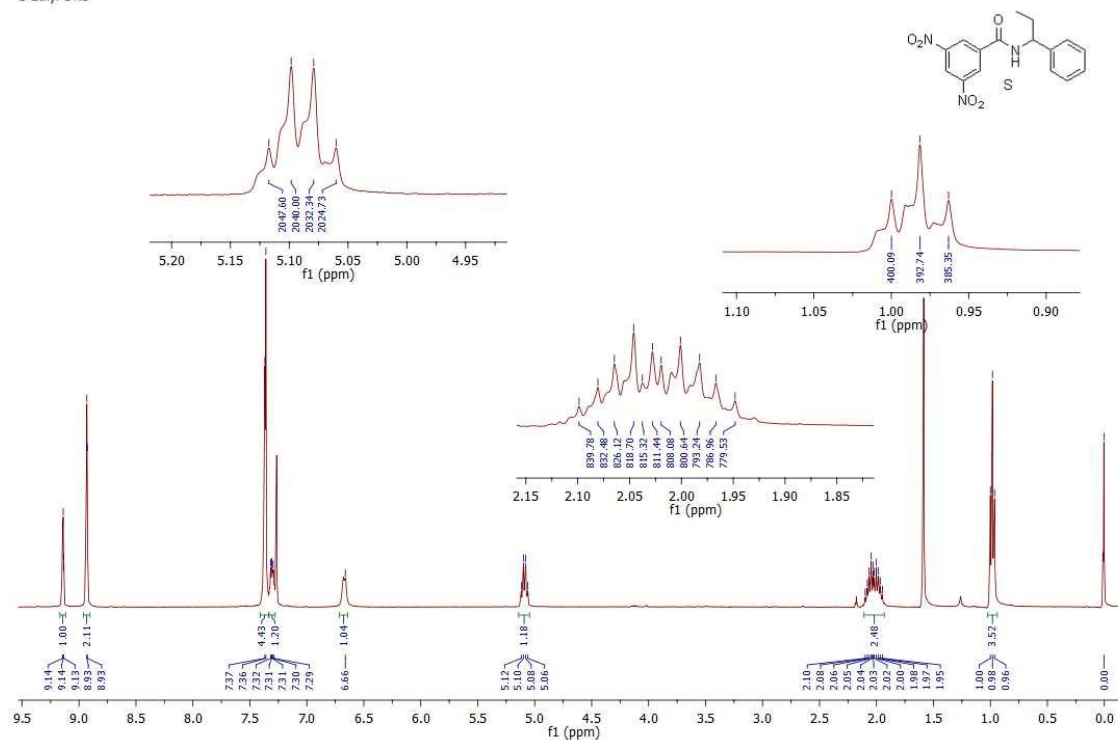

# <sup>13</sup>C NMR (101 MHz, Acetone-d<sub>6</sub>) of compound **7u**:

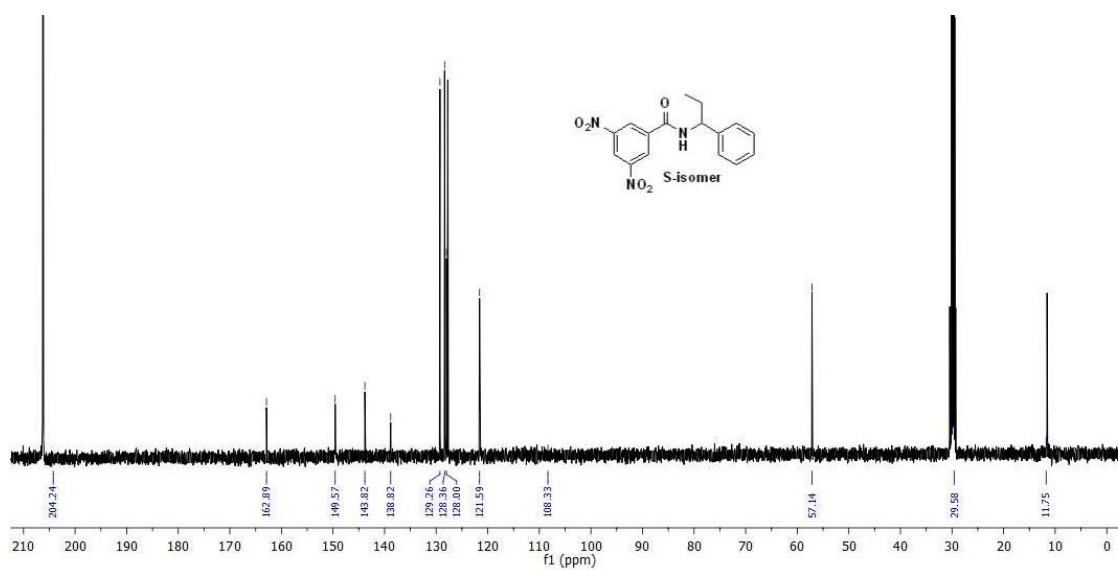

DEPT (101 MHz, Acetone-d<sub>6</sub>) of compound **7u**:

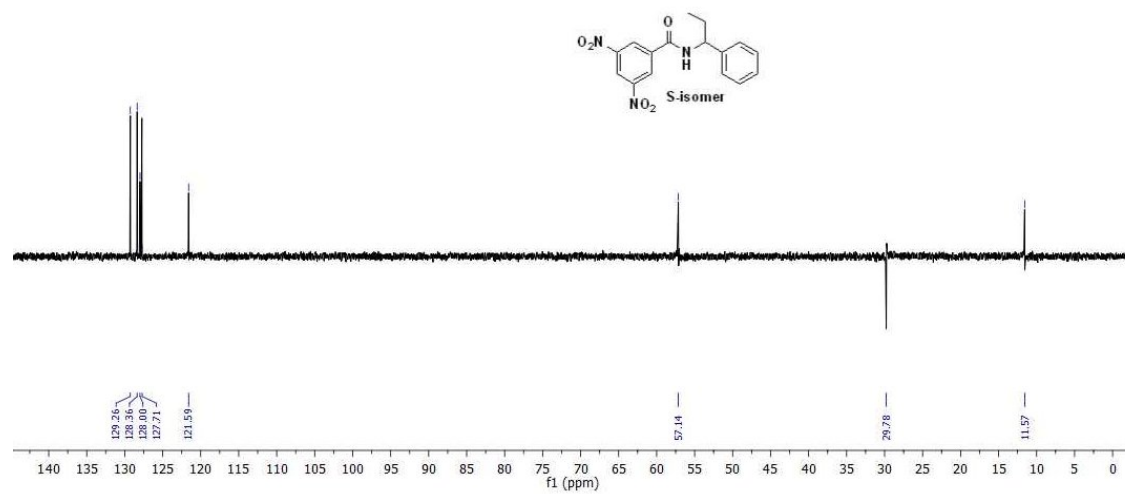

HRMS (ESI-TOF) of compound **7u**:

Qualitative Compound Report

Data File: 92.d  
 Sample Type: Sample  
 Instrument Name: Instrument 1  
 Acq Method: vishal\_neg12-01-13.m  
 IRM Calibration Status: Success  
 Comment:

Sample Name: 92  
 Position: Vial 10  
 User Name:  
 Acquired Time: 06-03-2013 PM 4:28:50  
 DA Method: SamplePurity-Default.m

Sample Group: Info.  
 Acquisition SW: 6200 series TOF/6500 series  
 Version: Q-TOF B.05.01 (B5125)

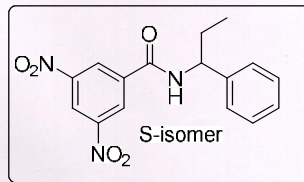

Compound Table

| Compound Label       | RT    | Mass     | Formula       | MFG Formula   | MFG Diff (ppm) | DB Formula    |
|----------------------|-------|----------|---------------|---------------|----------------|---------------|
| Cpd 4: C16 H15 N3 O5 | 0.195 | 329.1013 | C16 H15 N3 O5 | C16 H15 N3 O5 | -0.53          | C16 H15 N3 O5 |

| Compound Label       | m/z      | RT    | Algorithm                 | Mass     |
|----------------------|----------|-------|---------------------------|----------|
| Cpd 4: C16 H15 N3 O5 | 328.0941 | 0.195 | Find by Molecular Feature | 329.1013 |

MFE MS Spectrum

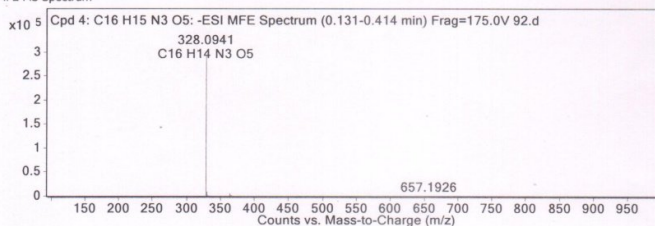

MS Spectrum Peak List

| m/z      | z  | Abund     | Formula          | Ion                 |
|----------|----|-----------|------------------|---------------------|
| 328.0941 | -1 | 292619.28 | C16 H14 N3 O5    | (M-H) <sup>-</sup>  |
| 329.0969 | -1 | 49689.63  | C16 H14 N3 O5    | (M-H) <sup>-</sup>  |
| 330.0997 | -1 | 8497.9    | C16 H14 N3 O5    | (M-H) <sup>-</sup>  |
| 331.1004 | -1 | 950.9     | C16 H14 N3 O5    | (M-H) <sup>-</sup>  |
| 364.0702 | -1 | 5222.44   | C16 H15 Cl N3 O5 | (M+Cl) <sup>-</sup> |
| 365.0733 | -1 | 1114.89   | C16 H15 Cl N3 O5 | (M+Cl) <sup>-</sup> |
| 366.0684 | -1 | 1878.61   | C16 H15 Cl N3 O5 | (M+Cl) <sup>-</sup> |
| 368.0832 | -1 | 646.6     | C16 H15 Cl N3 O5 | (M+Cl) <sup>-</sup> |
| 657.1926 | -1 | 680.89    |                  | (2M-H) <sup>-</sup> |
| 658.1966 | -1 | 435.9     |                  | (2M-H) <sup>-</sup> |

Predicted Isotope Match Table

| Isotope | m/z      | Calc m/z | Diff (ppm) | Abund % | Calc Abund % | Abund Sum % | Calc Abund Sum % |
|---------|----------|----------|------------|---------|--------------|-------------|------------------|
| 1       | 328.0941 | 328.0939 | -0.61      | 100     | 100          | 83.19       | 82.15            |
| 2       | 329.0969 | 329.0969 | -0.03      | 16.98   | 18.75        | 14.13       | 15.41            |
| 3       | 330.0997 | 330.0992 | -1.36      | 2.9     | 2.69         | 2.42        | 2.21             |
| 4       | 331.1004 | 331.1017 | 3.94       | 0.32    | 0.28         | 0.27        | 0.23             |

--- End Of Report ---

$^1\text{H}$  NMR (400 MHz,  $\text{CDCl}_3$ ) of compound **7v**:

r-butyl-dnb  
BUTYL-R-DNB

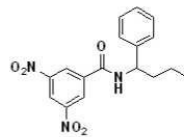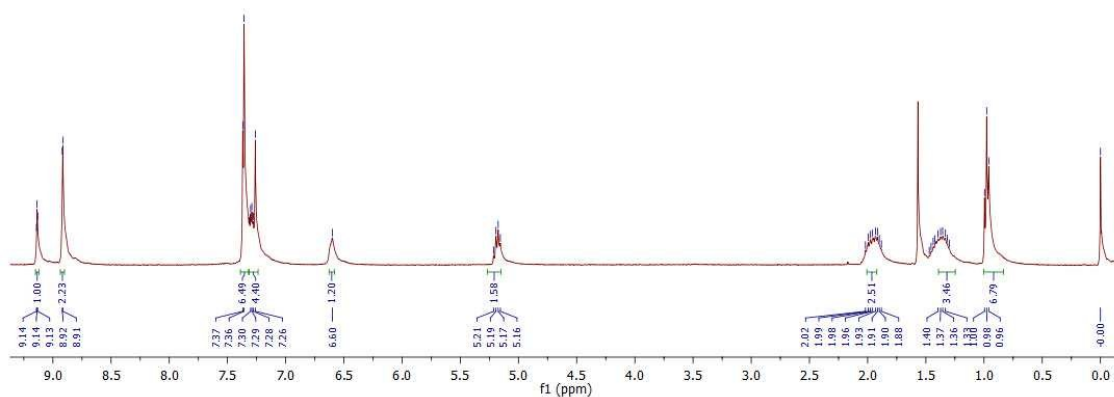

$^{13}\text{C}$  NMR (126 MHz,  $\text{Acetone-d}_6$ ) of compound **7v**:

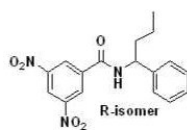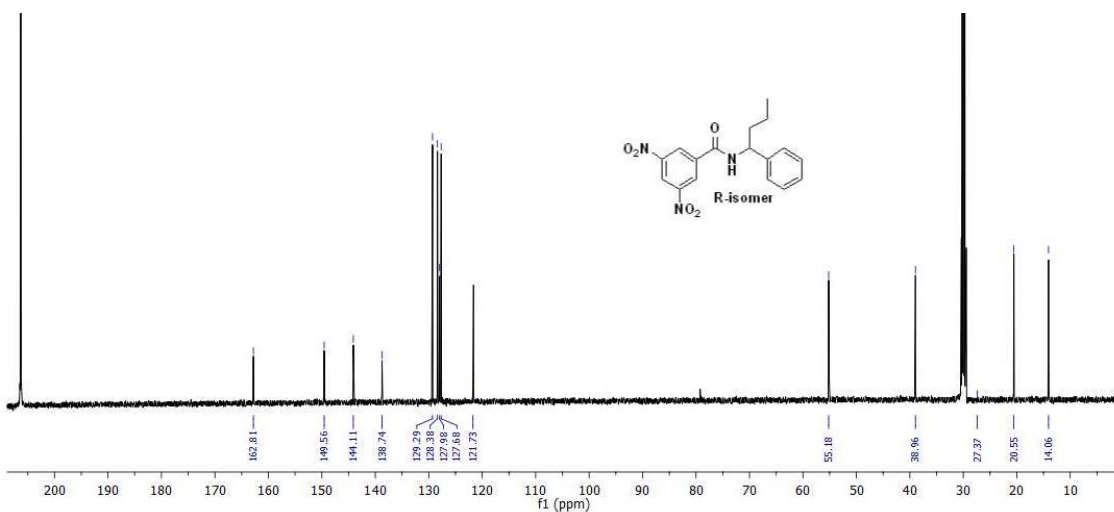

DEPT (126 MHz, Acetone-d<sub>6</sub>) of compound 7v:

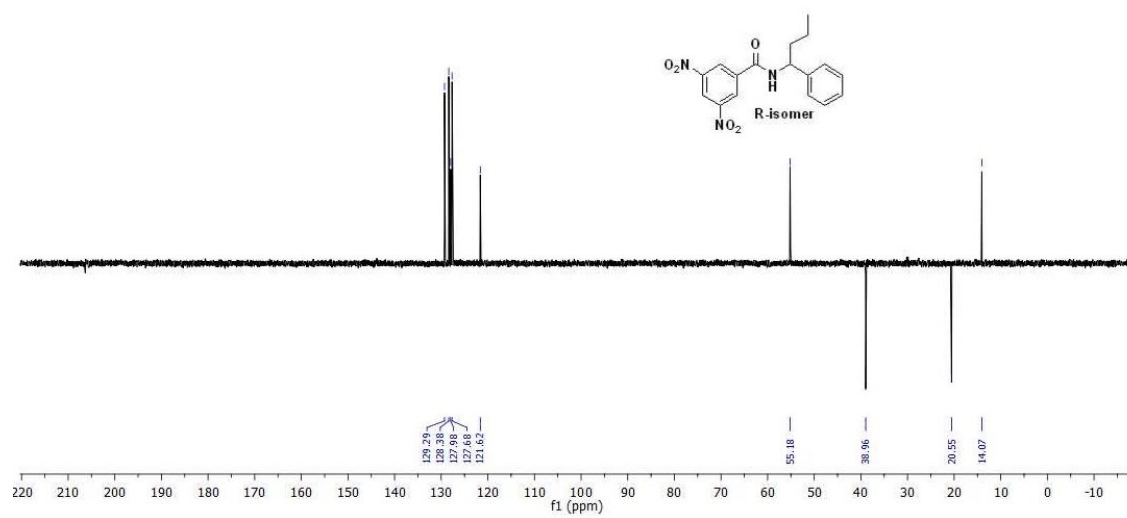

HRMS (ESI-TOF) of compound 7v:

Qualitative Compound Report

Data File 93.d Sample Name 93  
 Sample Type Sample Position Vial 14  
 Instrument Name vishal\_neg12-01-13.m User Name  
 Acq Method Success DA Method 06-03-2013 PM 4:51:34  
 IRM Calibration Status Success DA Method SamplePurity-Default.m  
 Comment

Sample Group Info.  
 Acquisition SW 6200 series TOF/6500 series  
 Version Q-TOF B.05.01 (B5125)

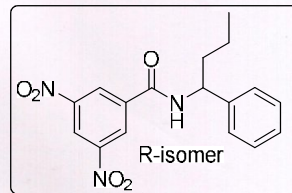

Compound Table

| Compound Label       | RT    | Mass     | Formula       | MFG Formula   | MFG Diff (ppm) | DB Formula    |
|----------------------|-------|----------|---------------|---------------|----------------|---------------|
| Cpd 5: C17 H17 N3 O5 | 0.192 | 343.1169 | C17 H17 N3 O5 | C17 H17 N3 O5 | -0.17          | C17 H17 N3 O5 |

| Compound Label       | m/z      | RT    | Algorithm                 | Mass     |
|----------------------|----------|-------|---------------------------|----------|
| Cpd 5: C17 H17 N3 O5 | 342.1096 | 0.192 | Find by Molecular Feature | 343.1169 |

MFE MS Spectrum

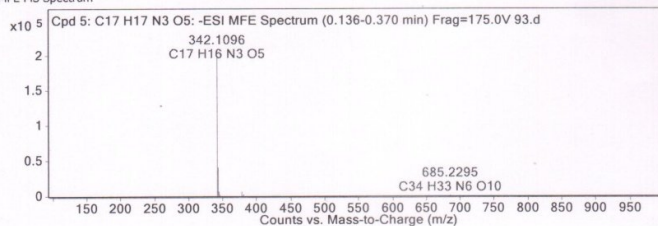

MS Spectrum Peak List

| m/z      | z  | Abund     | Formula          | Ion     |
|----------|----|-----------|------------------|---------|
| 342.1096 | -1 | 199693.44 | C17 H16 N3 O5    | (M-H)-  |
| 343.1126 | -1 | 40620.65  | C17 H16 N3 O5    | (M-H)-  |
| 344.1146 | -1 | 5707.66   | C17 H16 N3 O5    | (M-H)-  |
| 345.1157 | -1 | 723.33    | C17 H16 N3 O5    | (M-H)-  |
| 378.0858 | -1 | 5786.75   | C17 H17 Cl N3 O5 | (M+Cl)- |
| 379.0865 | -1 | 1078.57   | C17 H17 Cl N3 O5 | (M+Cl)- |
| 380.083  | -1 | 2086.93   | C17 H17 Cl N3 O5 | (M+Cl)- |
| 381.0865 | -1 | 463.38    | C17 H17 Cl N3 O5 | (M+Cl)- |
| 685.2295 | -1 | 672.09    | C34 H33 N6 O10   | (2M-H)- |

Predicted Isotope Match Table

| Isotope | m/z      | Calc m/z | Diff (ppm) | Abund % | Calc Abund % | Abund Sum % | Calc Abund Sum % |
|---------|----------|----------|------------|---------|--------------|-------------|------------------|
| 1       | 342.1096 | 342.1095 | -0.24      | 100     | 100          | 80.93       | 81.25            |
| 2       | 343.1126 | 343.1126 | -0.11      | 20.34   | 19.86        | 16.46       | 16.13            |
| 3       | 344.1146 | 344.115  | 1.19       | 2.86    | 2.9          | 2.31        | 2.35             |
| 4       | 345.1157 | 345.1175 | 5.03       | 0.36    | 0.31         | 0.29        | 0.26             |

--- End Of Report ---

$^1\text{H}$  NMR (400 MHz,  $\text{CDCl}_3$ ) of compound **8a**:

May02-2012-pumima  
R-Sec-But.

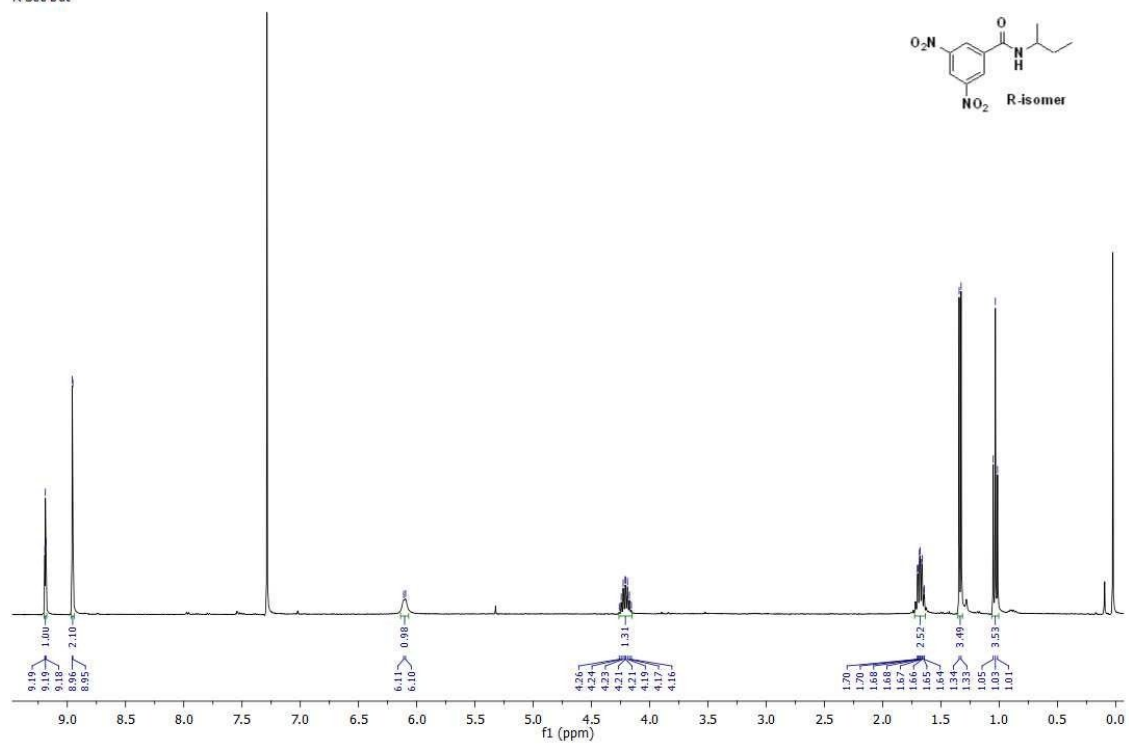

$^{13}\text{C}$  NMR (126 MHz,  $\text{Acetone-d}_6$ ) of compound **8a**:

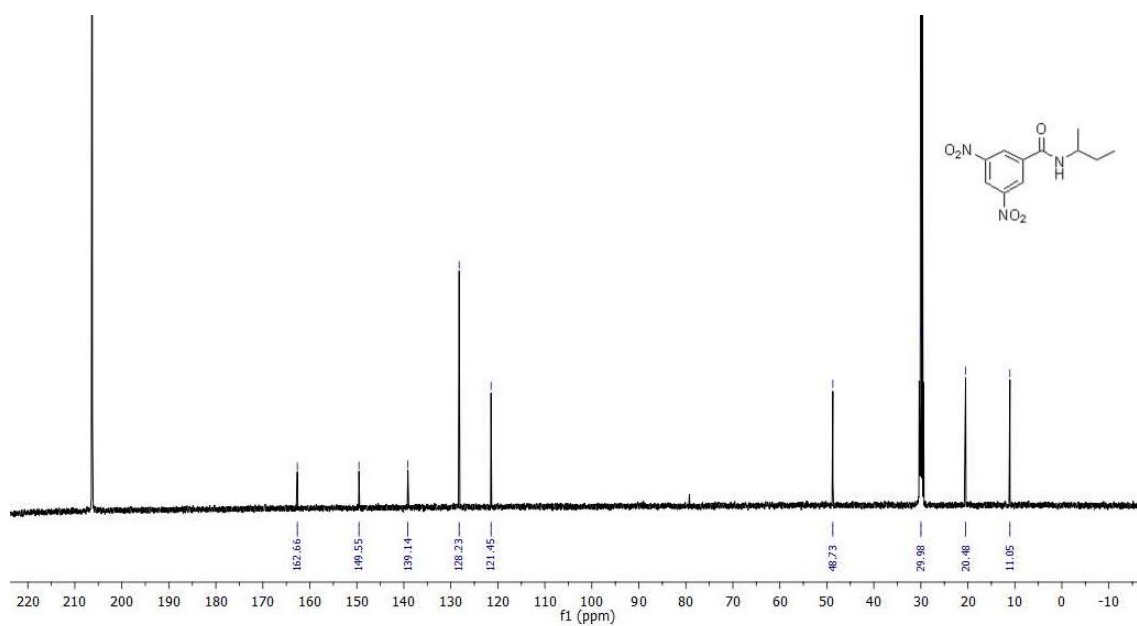

DEPT (126 MHz, Acetone-d<sub>6</sub>) of compound **8a**:

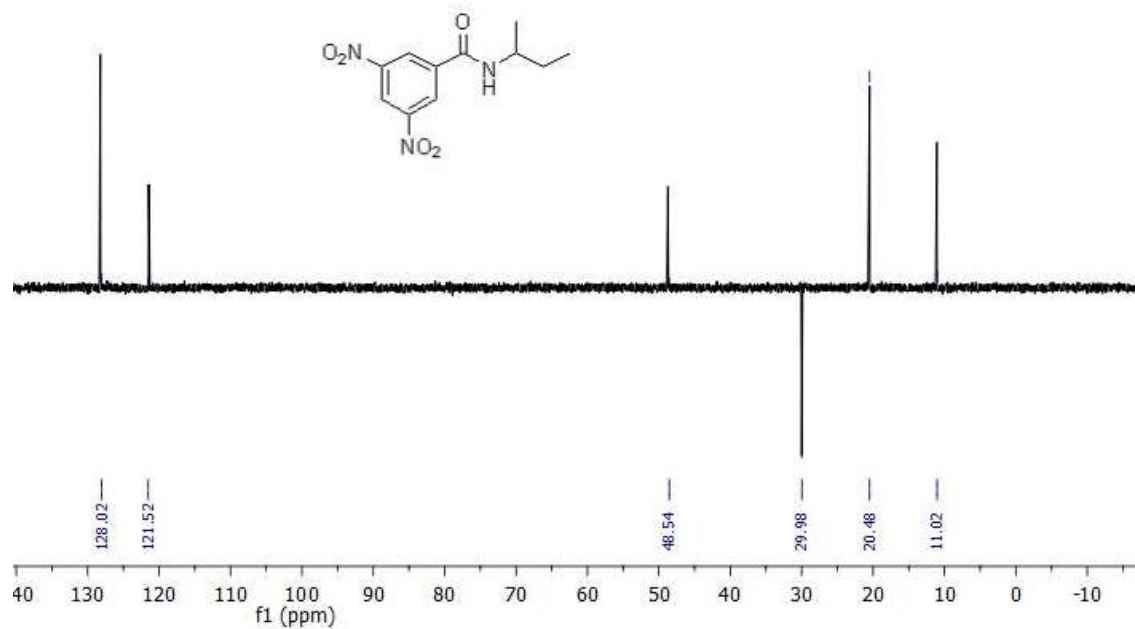



HRMS (ESI-TOF) of compound **8a**:

Qualitative Compound Report

Data File: 57.d  
 Sample Type: Sample  
 Instrument Name: Instrument 1  
 Acq Method: vishal\_neg12-01-13.m  
 IRM Calibration Status: Success  
 Comment:

Sample Name: 57  
 Position: Vial 22  
 User Name:  
 Acquired Time: 04-03-2013 PM 3:45:46  
 DA Method: SamplePurity-Default.m

Sample Group: Info.  
 Acquisition SW: 6200 series TOF/6500 series  
 Version: Q-TOF B.05.01 (B5125)

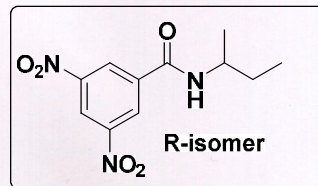

Compound Table

| Compound Label       | RT    | Mass     | Formula       | MFG Formula   | MFG Diff (ppm) | DB Formula    |
|----------------------|-------|----------|---------------|---------------|----------------|---------------|
| Cpd 5: C11 H13 N3 O5 | 0.187 | 267.0855 | C11 H13 N3 O5 | C11 H13 N3 O5 | 0.15           | C11 H13 N3 O5 |

| Compound Label       | m/z      | RT    | Algorithm                 | Mass     |
|----------------------|----------|-------|---------------------------|----------|
| Cpd 5: C11 H13 N3 O5 | 266.0781 | 0.187 | Find by Molecular Feature | 267.0855 |

MFE MS Spectrum

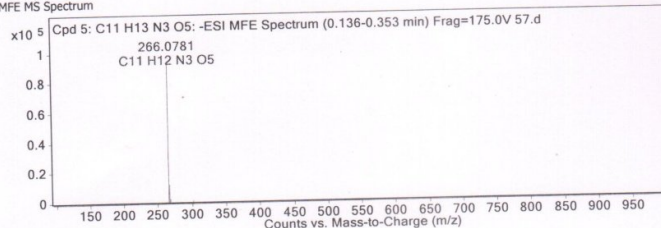

MS Spectrum Peak List

| m/z      | z  | Abund    | Formula          | Ion     |
|----------|----|----------|------------------|---------|
| 266.0781 | -1 | 93970.29 | C11 H12 N3 O5    | (M-H)-  |
| 267.0814 | -1 | 11795.6  | C11 H12 N3 O5    | (M-H)-  |
| 268.0839 | -1 | 2285.53  | C11 H12 N3 O5    | (M-H)-  |
| 302.0545 | -1 | 998.2    | C11 H13 Cl N3 O5 | (M+Cl)- |

Predicted Isotope Match Table

| Isotope | m/z      | Calc m/z | Diff (ppm) | Abund % | Calc Abund % | Abund Sum % | Calc Abund Sum % |
|---------|----------|----------|------------|---------|--------------|-------------|------------------|
| 1       | 266.0781 | 266.0782 | 0.37       | 100     | 100          | 86.97       | 86.83            |
| 2       | 267.0814 | 267.0811 | -1         | 12.55   | 13.32        | 10.92       | 11.57            |
| 3       | 268.0839 | 268.0831 | -3.02      | 2.43    | 1.85         | 2.12        | 1.6              |

--- End Of Report ---

$^1\text{H}$  NMR (400 MHz,  $\text{CDCl}_3$ ) of compound **8b**:

May02-2012-pumima  
S-Butyl

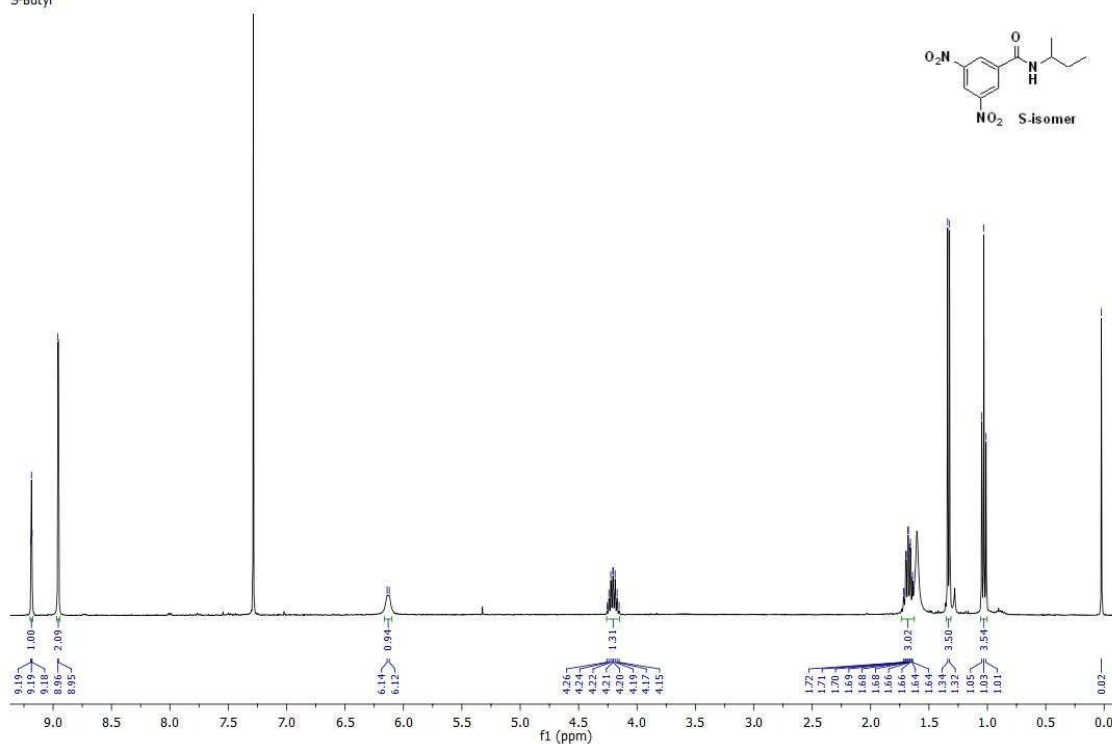

$^{13}\text{C}$  NMR (126 MHz,  $\text{Acetone-d}_6$ ) of compound **8b**:

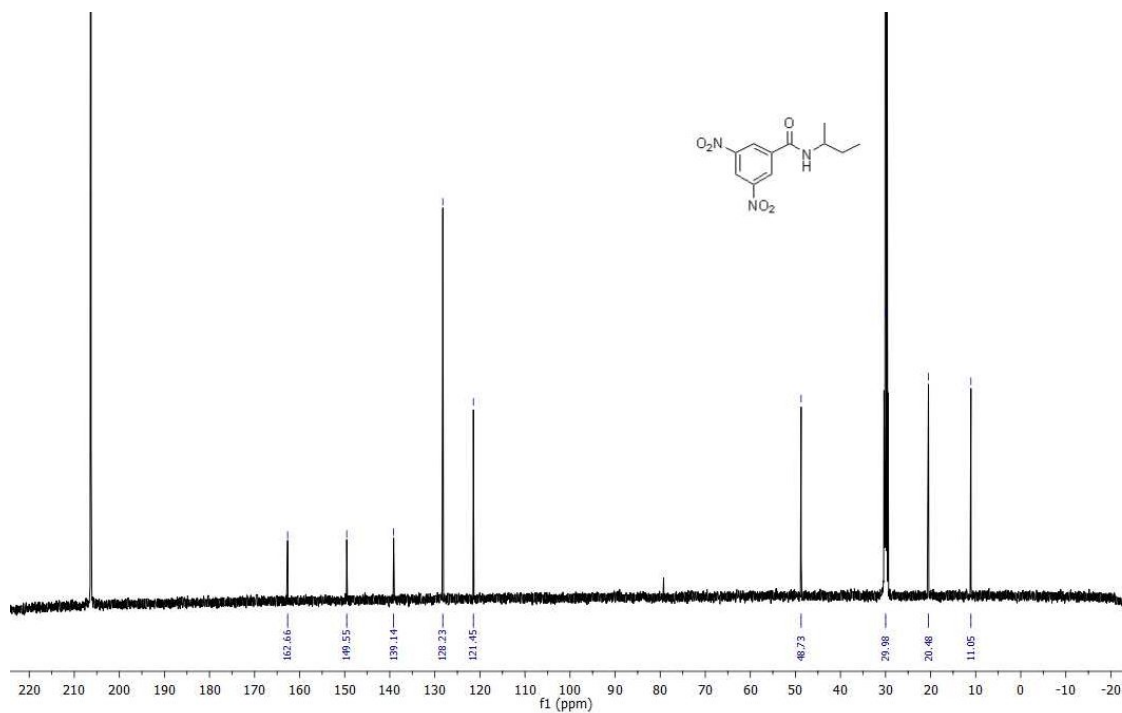

DEPT (126 MHz, Acetone-d<sub>6</sub>) of compound **8b**:

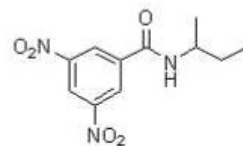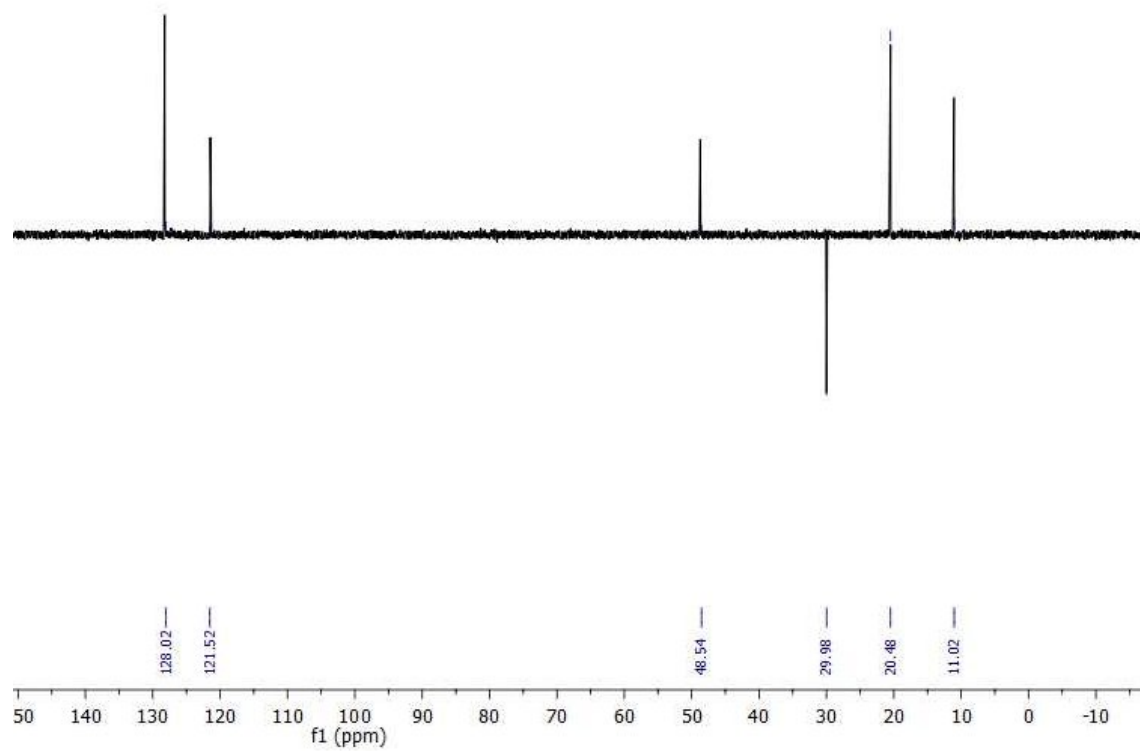

HRMS (ESI-TOF) of compound **8b**:

**Qualitative Compound Report**

Data File: 58.d  
 Sample Type: Sample  
 Instrument Name: Instrument 1  
 Acq Method: vishal\_neg12-01-13.m  
 IRM Calibration Status: Success  
 Comment:  
 Sample Group: Info.  
 Acquisition SW: 6200 series TOF/6500 series  
 Version: Q-TOF B.05.01 (B5125)

Sample Name: 58  
 Position: Vial 23  
 User Name:  
 Acquired Time: 04-03-2013 PM 3:50:17  
 DA Method: SamplePurity-Default.m

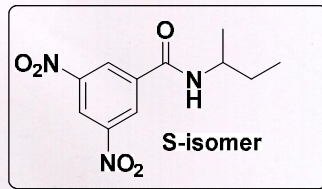

**Compound Table**

| Compound Label       | RT   | Mass     | Formula       | MFG Formula   | MFG Diff (ppm) | DB Formula    |
|----------------------|------|----------|---------------|---------------|----------------|---------------|
| Cpd 4: C11 H13 N3 O5 | 0.19 | 267.0861 | C11 H13 N3 O5 | C11 H13 N3 O5 | -2.19          | C11 H13 N3 O5 |

| Compound Label       | m/z      | RT   | Algorithm                 | Mass     |
|----------------------|----------|------|---------------------------|----------|
| Cpd 4: C11 H13 N3 O5 | 266.0788 | 0.19 | Find by Molecular Feature | 267.0861 |

MFE MS Spectrum

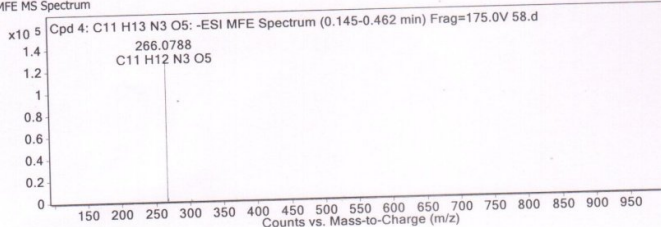

**MS Spectrum Peak List**

| m/z      | z  | Abund     | Formula       | Ion     |
|----------|----|-----------|---------------|---------|
| 266.0788 | -1 | 128660.33 | C11 H12 N3 O5 | (M-H)-  |
| 267.0818 | -1 | 16763.63  | C11 H12 N3 O5 | (M-H)-  |
| 268.0835 | -1 | 3442.76   | C11 H12 N3 O5 | (M-H)-  |
| 302.0545 | -1 | 1417.69   |               | (M+Cl)- |
| 303.0554 | -1 | 479.55    |               | (M+Cl)- |
| 304.0502 | -1 | 545.05    |               | (M+Cl)- |

**Predicted Isotope Match Table**

| Isotope | m/z      | Calc m/z | Diff (ppm) | Abund % | Calc Abund % | Abund Sum % | Calc Abund Sum % |
|---------|----------|----------|------------|---------|--------------|-------------|------------------|
| 1       | 266.0788 | 266.0782 | -2.17      | 100     | 100          | 86.43       | 86.83            |
| 2       | 267.0818 | 267.0811 | -2.56      | 13.03   | 13.32        | 11.26       | 11.57            |
| 3       | 268.0835 | 268.0831 | -1.45      | 2.68    | 1.85         | 2.31        | 1.6              |

--- End Of Report ---

$^1\text{H}$  NMR (400 MHz,  $\text{CDCl}_3$ ) of compound **8c**:

July07-2012  
R-Heptdnb

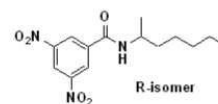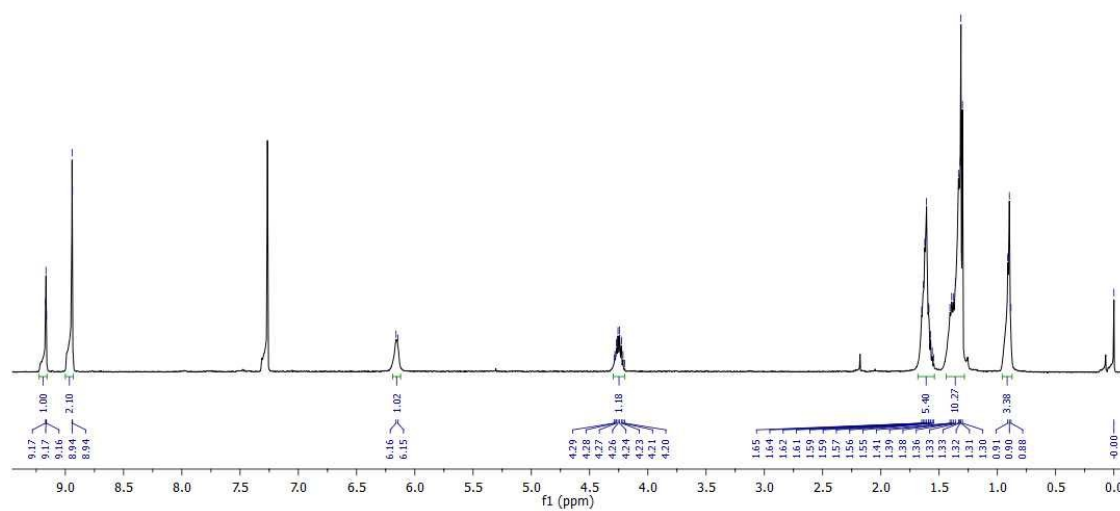

$^{13}\text{C}$  NMR (126 MHz,  $\text{Acetone-d}_6$ ) of compound **8c**:

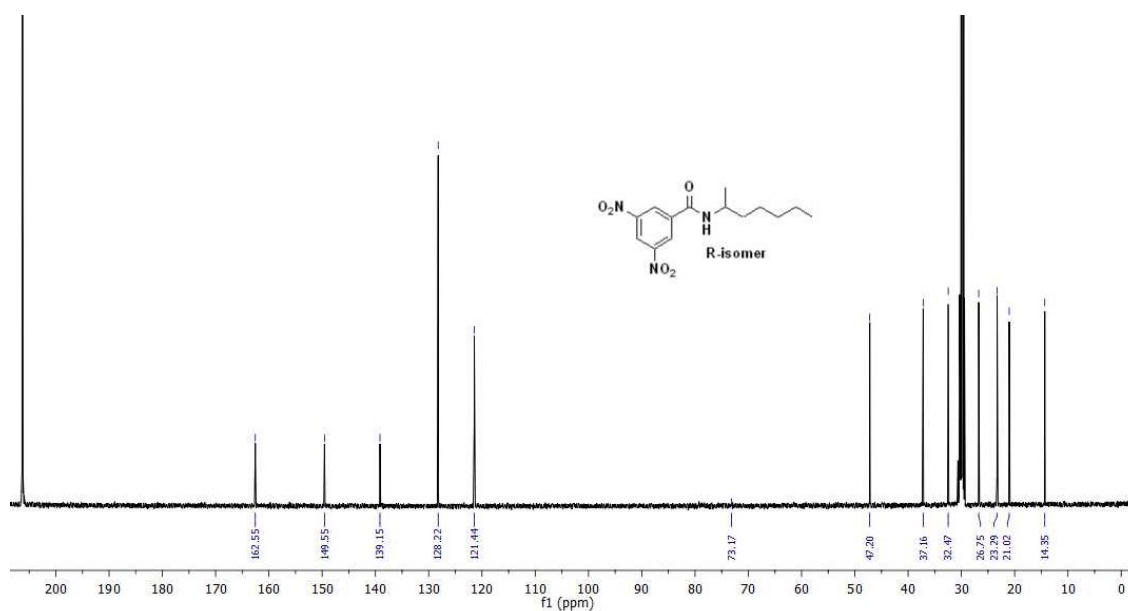

DEPT (126 MHz, Acetone-d<sub>6</sub>) of compound **8c**:

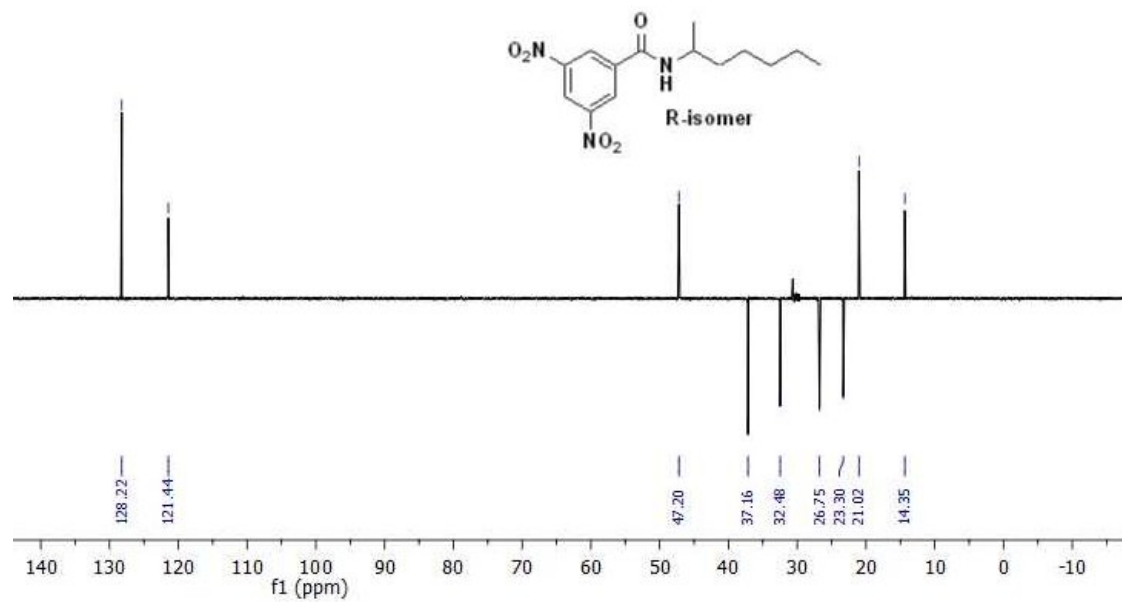

HRMS (ESI-TOF) of compound **8c**:

### Qualitative Compound Report

|                               |                           |                      |                          |
|-------------------------------|---------------------------|----------------------|--------------------------|
| <b>Data File</b>              | 82.d                      | <b>Sample Name</b>   | 82                       |
| <b>Sample Type</b>            | Sample                    | <b>Position</b>      | Vial 36                  |
| <b>Instrument Name</b>        | Instrument 1              | <b>User Name</b>     |                          |
| <b>Acq Method</b>             | vishaL_MS_Negative_mode.m | <b>Acquired Time</b> | 28-07-2012 PM 03:03:17   |
| <b>IRM Calibration Status</b> | Some Ions Missed          | <b>DA Method</b>     | VishaL_Compound_report.m |
| <b>Comment</b>                |                           |                      |                          |
| <b>Sample Group</b>           | Info.                     |                      |                          |

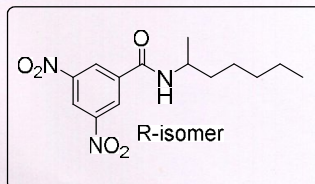

**Compound Table**

| Compound Label       | RT    | Mass     | Formula       | MFG Formula   | MFG Diff (ppm) | DB Formula    |
|----------------------|-------|----------|---------------|---------------|----------------|---------------|
| Cpd 3: C14 H19 N3 O5 | 0.212 | 309.1324 | C14 H19 N3 O5 | C14 H19 N3 O5 | 0.15           | C14 H19 N3 O5 |

| Compound Label       | m/z      | RT    | Algorithm                 | Mass     |
|----------------------|----------|-------|---------------------------|----------|
| Cpd 3: C14 H19 N3 O5 | 308.1251 | 0.212 | Find by Molecular Feature | 309.1324 |

**MFE MS Spectrum**

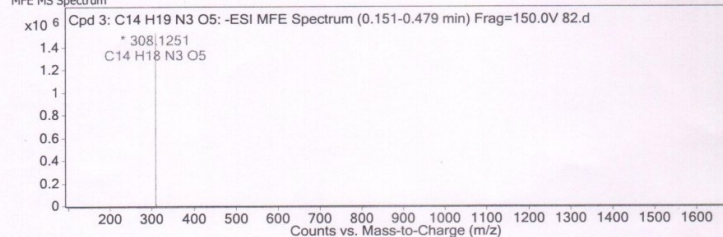

**MFE MS Zoomed Spectrum**

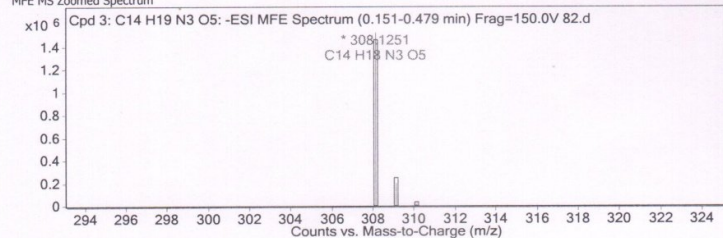

**MS Spectrum Peak List**

| m/z      | z  | Abund     | Formula       | Ion    |
|----------|----|-----------|---------------|--------|
| 308.1251 | -1 | 1525367.6 | C14 H18 N3 O5 | (M-H)- |
| 309.1295 | -1 | 200073    | C14 H18 N3 O5 | (M-H)- |
| 310.1323 | -1 | 16105.4   | C14 H18 N3 O5 | (M-H)- |

--- End Of Report ---

$^1\text{H}$  NMR (400 MHz,  $\text{CDCl}_3$ ) of compound **8d**:

July07-2012  
S-Heptyl

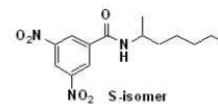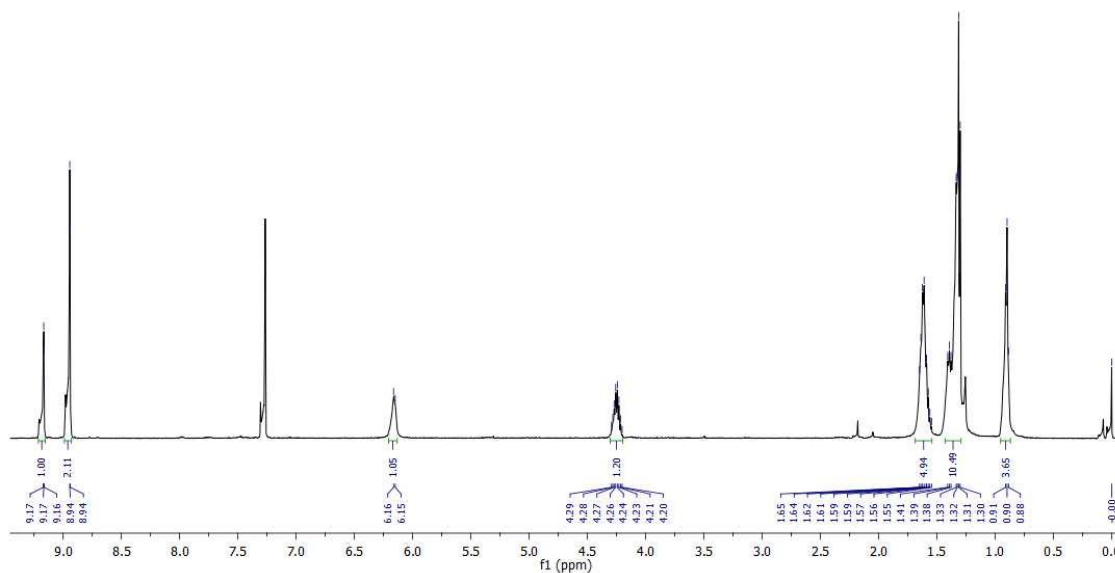

$^{13}\text{C}$  NMR (126 MHz,  $\text{Acetone-d}_6$ ) of compound **8d**:

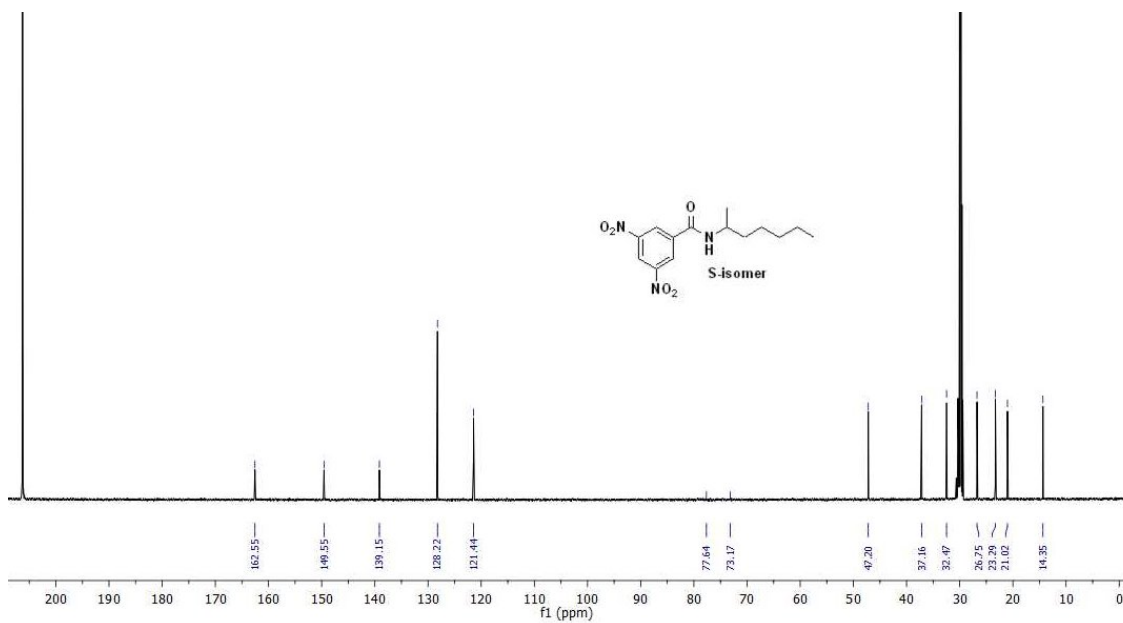



DEPT (126 MHz, Acetone-d<sub>6</sub>) of compound **8d**:

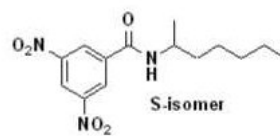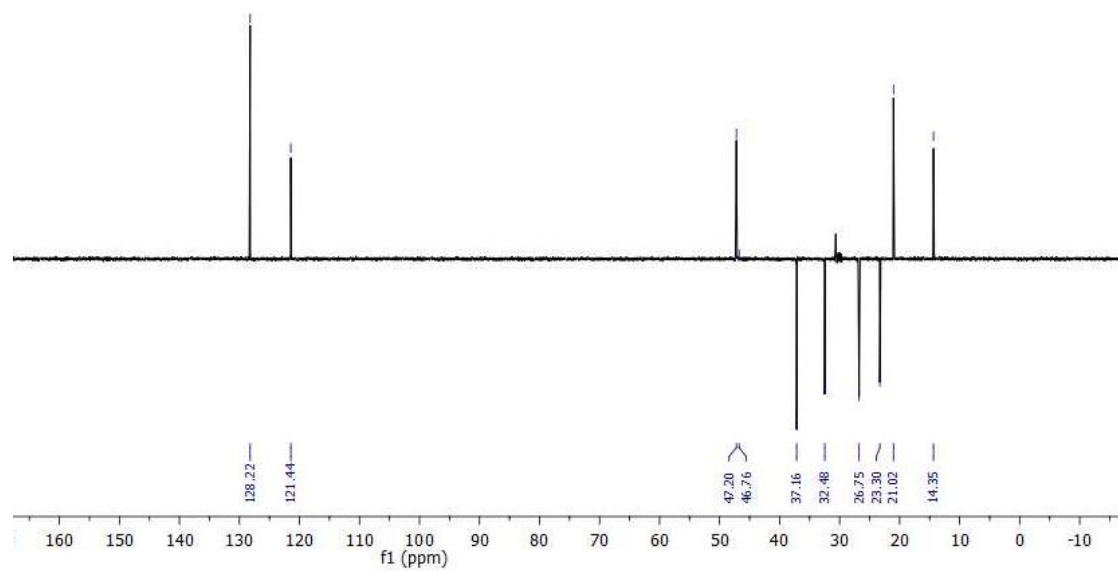

HRMS (ESI-TOF) of compound **8d**:

Qualitative Compound Report

Data File: 83.d  
 Sample Type: Sample  
 Instrument Name: Instrument 1  
 Acq Method: vishal\_MS\_Negative\_mode.m  
 IRM Calibration Status: Some Ions Missed  
 Comment:  
 Sample Group: Info.

Sample Name: 83  
 Position: Vial 37  
 User Name:  
 Acquired Time: 28-07-2012 PM 03:08:43  
 DA Method: Vishal\_Compound\_report.m

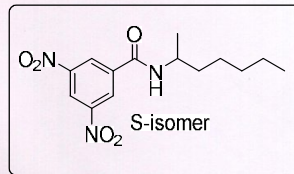

Compound Table

| Compound Label       | RT    | Mass     | Formula       | MFG Formula   | MFG Diff (ppm) | DB Formula    |
|----------------------|-------|----------|---------------|---------------|----------------|---------------|
| Cpd 1: C14 H19 N3 O5 | 0.212 | 309.1327 | C14 H19 N3 O5 | C14 H19 N3 O5 | -0.7           | C14 H19 N3 O5 |

| Compound Label       | m/z      | RT    | Algorithm                 | Mass     |
|----------------------|----------|-------|---------------------------|----------|
| Cpd 1: C14 H19 N3 O5 | 308.1254 | 0.212 | Find by Molecular Feature | 309.1327 |

MFE MS Spectrum

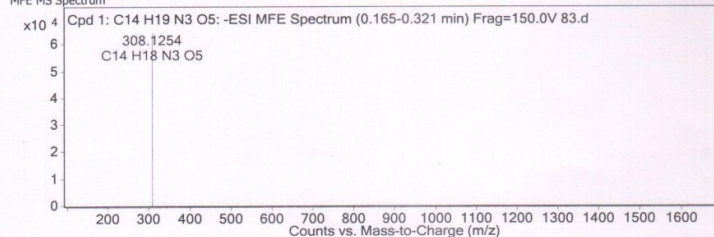

MFE MS Zoomed Spectrum

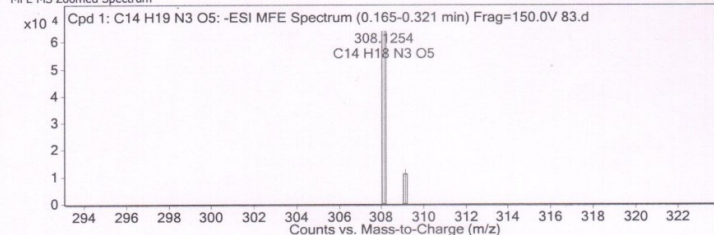

MS Spectrum Peak List

| m/z      | z  | Abund   | Formula       | Ion                |
|----------|----|---------|---------------|--------------------|
| 308.1254 | -1 | 64050.7 | C14 H18 N3 O5 | (M-H) <sup>-</sup> |
| 309.1287 | -1 | 12739.6 | C14 H18 N3 O5 | (M-H) <sup>-</sup> |

--- End Of Report ---

$^1\text{H}$  NMR (400 MHz,  $\text{CDCl}_3$ ) of compound **8e**:

N-Hexyl-DNB  
Hexyl-DNB

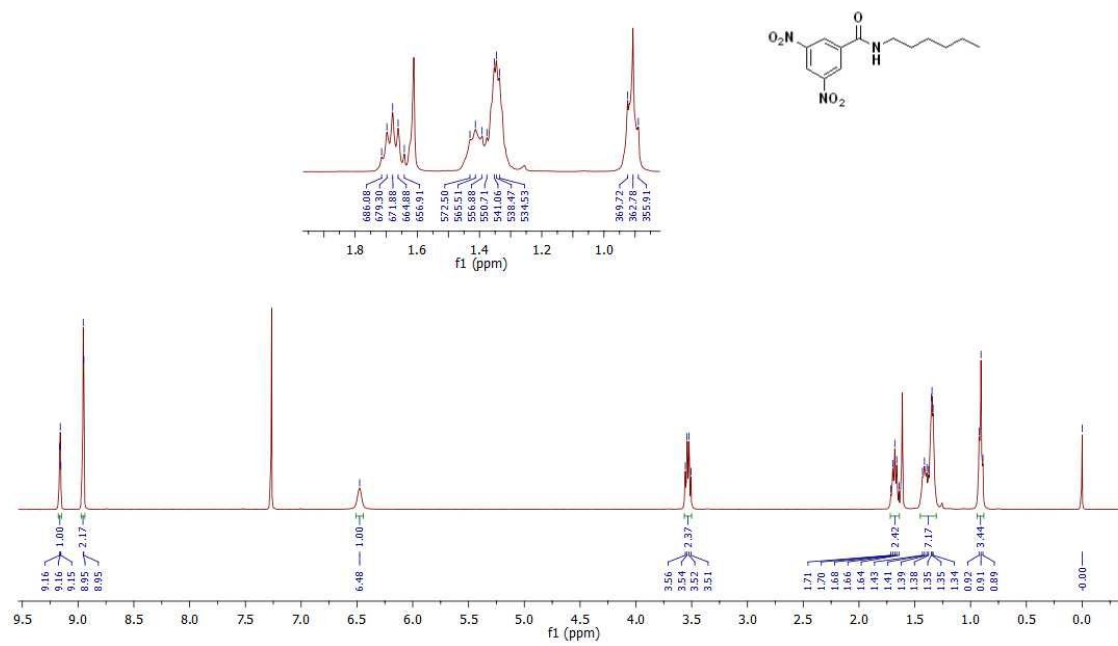

HRMS (ESI-TOF) of compound **8e**:

Qualitative Compound Report

Data File: 94.d Sample Name: 94  
 Sample Type: Sample Position: Vial 18  
 Instrument Name: Instrument 1 User Name:  
 Acq Method: visha\_neg12-01-13.m Acquired Time: 06-03-2013 PM 5:14:18  
 IRM Calibration Status: Success DA Method: SamplePurity-Default.m  
 Comment:

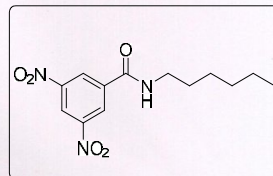

Sample Group: Info.  
 Acquisition SW: 6200 series TOF/6500 series  
 Version: Q-TOF B.05.01 (B5125)

Compound Table

| Compound Label       | RT    | Mass     | Formula       | MFG Formula   | MFG Diff (ppm) | DB Formula    |
|----------------------|-------|----------|---------------|---------------|----------------|---------------|
| Cpd 6: C13 H17 N3 O5 | 0.194 | 295.1163 | C13 H17 N3 O5 | C13 H17 N3 O5 | 1.93           | C13 H17 N3 O5 |

| Compound Label       | m/z     | RT    | Algorithm                 | Mass     |
|----------------------|---------|-------|---------------------------|----------|
| Cpd 6: C13 H17 N3 O5 | 294.109 | 0.194 | Find by Molecular Feature | 295.1163 |

MFE MS Spectrum

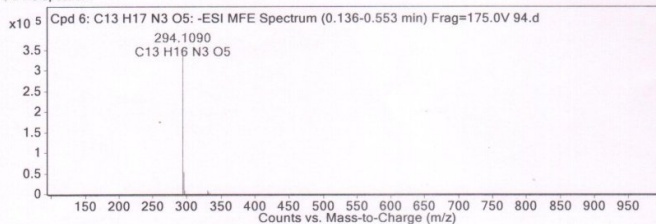

MS Spectrum Peak List

| m/z      | z  | Abund     | Formula          | Ion     |
|----------|----|-----------|------------------|---------|
| 294.109  | -1 | 341663.66 | C13 H16 N3 O5    | (M-H)-  |
| 295.1119 | -1 | 52674.53  | C13 H16 N3 O5    | (M-H)-  |
| 296.1141 | -1 | 7395.77   | C13 H16 N3 O5    | (M-H)-  |
| 297.1175 | -1 | 824.31    | C13 H16 N3 O5    | (M-H)-  |
| 330.0852 | -1 | 8844.18   | C13 H17 Cl N3 O5 | (M+Cl)- |
| 331.0885 | -1 | 1484.76   | C13 H17 Cl N3 O5 | (M+Cl)- |
| 332.0828 | -1 | 3362.59   | C13 H17 Cl N3 O5 | (M+Cl)- |
| 333.0839 | -1 | 371.07    | C13 H17 Cl N3 O5 | (M+Cl)- |
| 334.0988 | -1 | 1427.12   | C13 H17 Cl N3 O5 | (M+Cl)- |

Predicted Isotope Match Table

| Isotope | m/z      | Calc m/z | Diff (ppm) | Abund % | Calc Abund % | Abund Sum % | Calc Abund Sum % |
|---------|----------|----------|------------|---------|--------------|-------------|------------------|
| 1       | 294.109  | 294.1095 | 1.94       | 100     | 100          | 84.87       | 84.82            |
| 2       | 295.1119 | 295.1125 | 1.98       | 15.42   | 15.53        | 13.08       | 13.17            |
| 3       | 296.1141 | 296.1146 | 1.68       | 2.16    | 2.16         | 1.84        | 1.83             |
| 4       | 297.1175 | 297.1171 | -1.14      | 0.24    | 0.21         | 0.2         | 0.18             |

--- End Of Report ---

$^1\text{H}$  NMR (400 MHz,  $\text{CDCl}_3$ ) of compound **8f**:

May08-2012-pumima  
HEX-DECYL

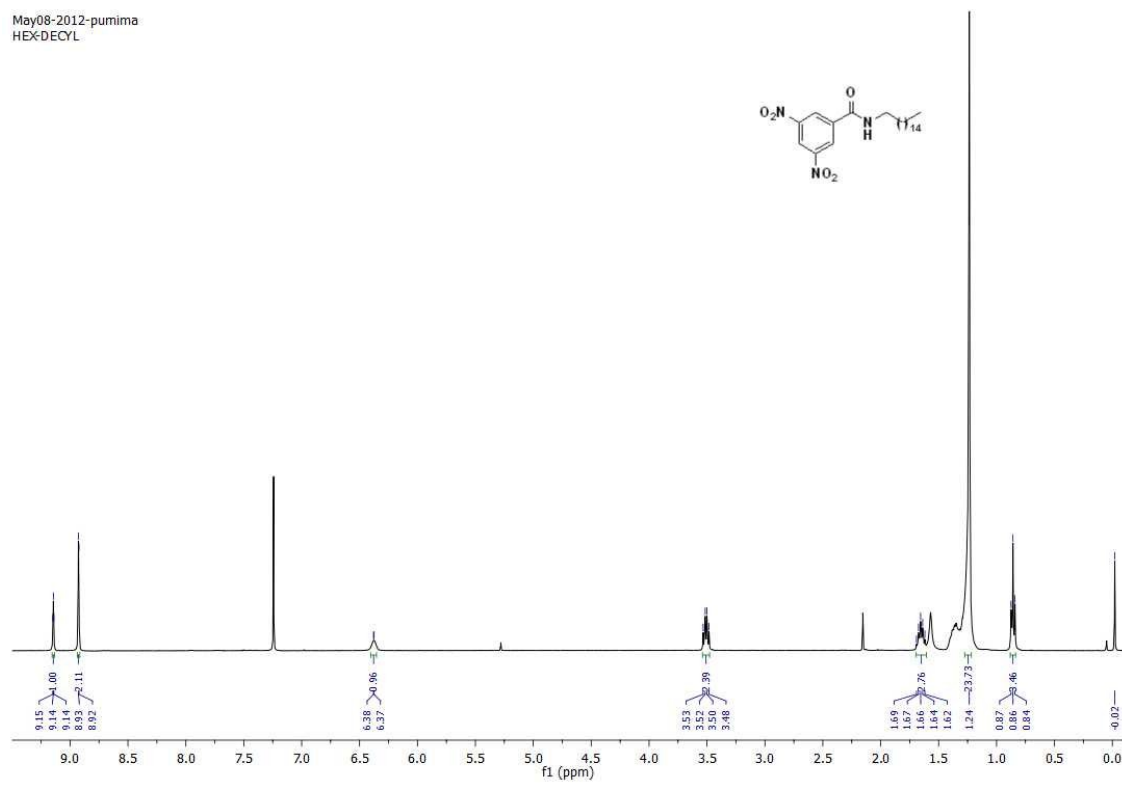

HRMS (ESI-TOF) of compound **8f**:

Qualitative Compound Report

Data File: 59.d Sample Name: 59  
 Sample Type: Sample Position: Vial 37  
 Instrument Name: Instrument 1 User Name:  
 Acq Method: vishal\_neg12-01-13.m Acquired Time: 07-03-2013 PM 6:14:48  
 IRM Calibration Status: Success DA Method: SamplePurity-Default.m  
 Comment:

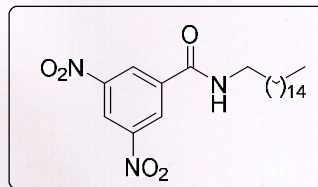

Sample Group: Info.  
 Acquisition SW: 6200 series TOF/6500 series  
 Version: Q-TOF B.05.01 (B5125)

Compound Table

| Compound Label        | RT   | Mass     | Formula       | MFG Formula   | MFG Diff (ppm) | DB Formula    |
|-----------------------|------|----------|---------------|---------------|----------------|---------------|
| Cpd 13: C23 H37 N3 O5 | 0.19 | 435.2735 | C23 H37 N3 O5 | C23 H37 N3 O5 | -0.33          | C23 H37 N3 O5 |

| Compound Label        | m/z      | RT   | Algorithm                 | Mass     |
|-----------------------|----------|------|---------------------------|----------|
| Cpd 13: C23 H37 N3 O5 | 434.2661 | 0.19 | Find by Molecular Feature | 435.2735 |

MFE MS Spectrum

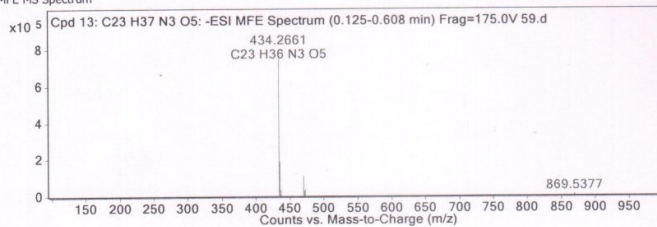

MS Spectrum Peak List

| m/z      | z  | Abund     | Formula          | Ion     |
|----------|----|-----------|------------------|---------|
| 434.2661 | -1 | 764667.69 | C23 H36 N3 O5    | (M-H)-  |
| 435.2694 | -1 | 186249.17 | C23 H36 N3 O5    | (M-H)-  |
| 436.2724 | -1 | 29959.85  | C23 H36 N3 O5    | (M-H)-  |
| 437.2761 | -1 | 4755.93   | C23 H36 N3 O5    | (M-H)-  |
| 470.2425 | -1 | 109277.3  | C23 H37 Cl N3 O5 | (M+Cl)- |
| 471.2455 | -1 | 29304.59  | C23 H37 Cl N3 O5 | (M+Cl)- |
| 472.2405 | -1 | 37263.44  | C23 H37 Cl N3 O5 | (M+Cl)- |
| 473.2435 | -1 | 9328.33   | C23 H37 Cl N3 O5 | (M+Cl)- |
| 869.5377 | -1 | 7317.81   |                  | (2M-H)- |
| 870.5405 | -1 | 5897.85   |                  | (2M-H)- |

Predicted Isotope Match Table

| Isotope | m/z      | Calc m/z | Diff (ppm) | Abund % | Calc Abund % | Abund Sum % | Calc Abund Sum % |
|---------|----------|----------|------------|---------|--------------|-------------|------------------|
| 1       | 434.2661 | 434.266  | -0.2       | 100     | 100          | 77.54       | 75.99            |
| 2       | 435.2694 | 435.2692 | -0.59      | 24.36   | 26.58        | 18.89       | 20.19            |
| 3       | 436.2724 | 436.2719 | -1.31      | 3.92    | 4.42         | 3.04        | 3.36             |
| 4       | 437.2761 | 437.2745 | -3.77      | 0.62    | 0.55         | 0.48        | 0.42             |
| 5       | 438.2779 | 438.277  | -2.05      | 0.07    | 0.06         | 0.05        | 0.04             |

--- End Of Report ---

$^1\text{H}$  NMR (400 MHz,  $\text{CDCl}_3$ ) of compound **9a**:

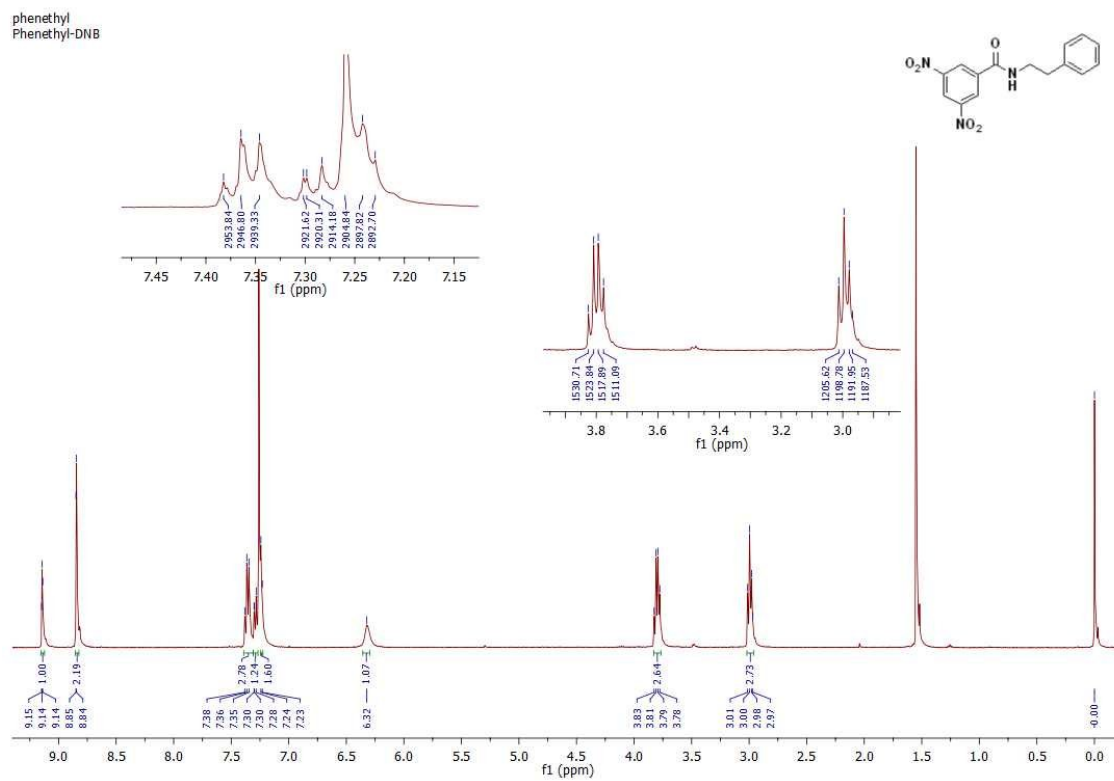

$^{13}\text{C}$  NMR (126 MHz, Acetone- $\text{d}_6$ ) of compound **9a**:

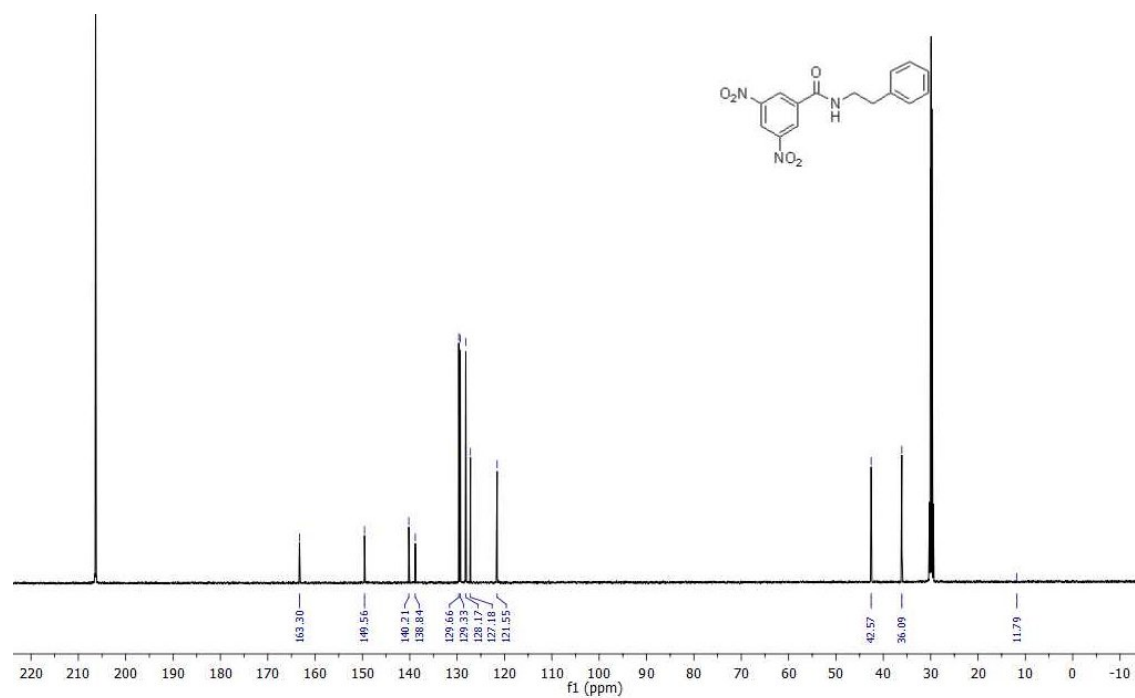

DEPT (126 MHz, Acetone- $\text{d}_6$ ) of compound **9a**:

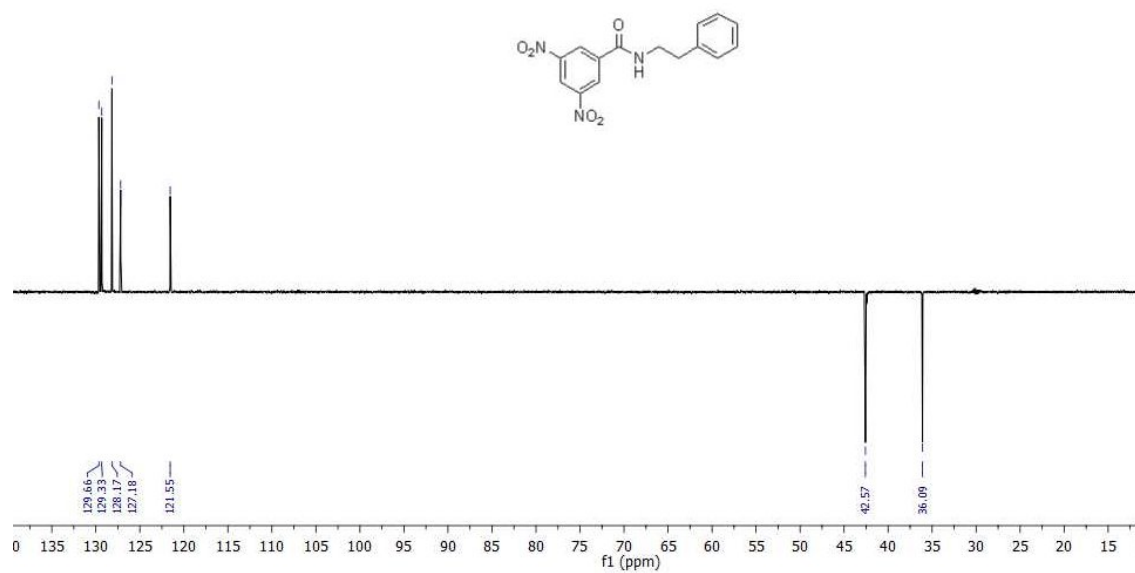



HRMS (ESI-TOF) of compound **9a**:

Qualitative Compound Report

Data File: 89.d Sample Name: 89  
 Sample Type: Sample Position: Vial 13  
 Instrument Name: Instrument 1 User Name:  
 Acq Method: vishal\_neg12-01-13.m Acquired Time: 06-03-2013 PM 4:47:02  
 IRM Calibration Status: Success DA Method: SamplePurity-Default.m  
 Comment:

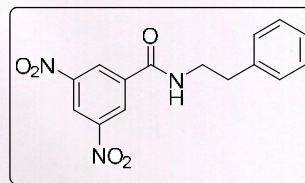

Sample Group: Info.  
 Acquisition SW: 6200 series TOF/6500 series  
 Version: Q-TOF B.05.01 (B5125)

Compound Table

| Compound Label       | RT    | Mass     | Formula       | MFG Formula   | MFG Diff (ppm) | DB Formula    |
|----------------------|-------|----------|---------------|---------------|----------------|---------------|
| Cpd 4: C15 H13 N3 O5 | 0.193 | 315.0853 | C15 H13 N3 O5 | C15 H13 N3 O5 | 0.84           | C15 H13 N3 O5 |

| Compound Label       | m/z     | RT    | Algorithm                 | Mass     |
|----------------------|---------|-------|---------------------------|----------|
| Cpd 4: C15 H13 N3 O5 | 314.078 | 0.193 | Find by Molecular Feature | 315.0853 |

MFE MS Spectrum

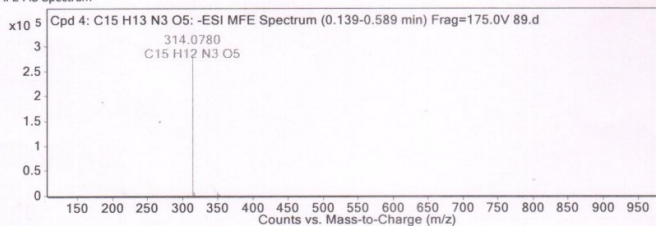

MS Spectrum Peak List

| m/z      | z  | Abund     | Formula          | Ion     |
|----------|----|-----------|------------------|---------|
| 314.078  | -1 | 282142.03 | C15 H12 N3 O5    | (M-H)-  |
| 315.0807 | -1 | 46531.81  | C15 H12 N3 O5    | (M-H)-  |
| 316.0834 | -1 | 7398.45   | C15 H12 N3 O5    | (M-H)-  |
| 317.0845 | -1 | 915.71    | C15 H12 N3 O5    | (M-H)-  |
| 350.0543 | -1 | 6271.39   | C15 H13 Cl N3 O5 | (M+Cl)- |
| 351.0567 | -1 | 918.49    | C15 H13 Cl N3 O5 | (M+Cl)- |
| 352.0518 | -1 | 2316.99   | C15 H13 Cl N3 O5 | (M+Cl)- |
| 353.0533 | -1 | 587.3     | C15 H13 Cl N3 O5 | (M+Cl)- |
| 354.0681 | -1 | 819.36    | C15 H13 Cl N3 O5 | (M+Cl)- |

Predicted Isotope Match Table

| Isotope | m/z      | Calc m/z | Diff (ppm) | Abund % | Calc Abund % | Abund Sum % | Calc Abund Sum % |
|---------|----------|----------|------------|---------|--------------|-------------|------------------|
| 1       | 314.078  | 314.0782 | 0.69       | 100     | 100          | 83.72       | 83.06            |
| 2       | 315.0807 | 315.0812 | 1.74       | 16.49   | 17.65        | 13.81       | 14.66            |
| 3       | 316.0834 | 316.0835 | 0.38       | 2.62    | 2.49         | 2.2         | 2.07             |
| 4       | 317.0845 | 317.086  | 4.72       | 0.32    | 0.26         | 0.27        | 0.21             |

--- End Of Report ---

$^1\text{H}$  NMR (400 MHz,  $\text{CDCl}_3$ ) of compound **9b**:

benzyl-me-DNB  
Benzyl-Me-DNB

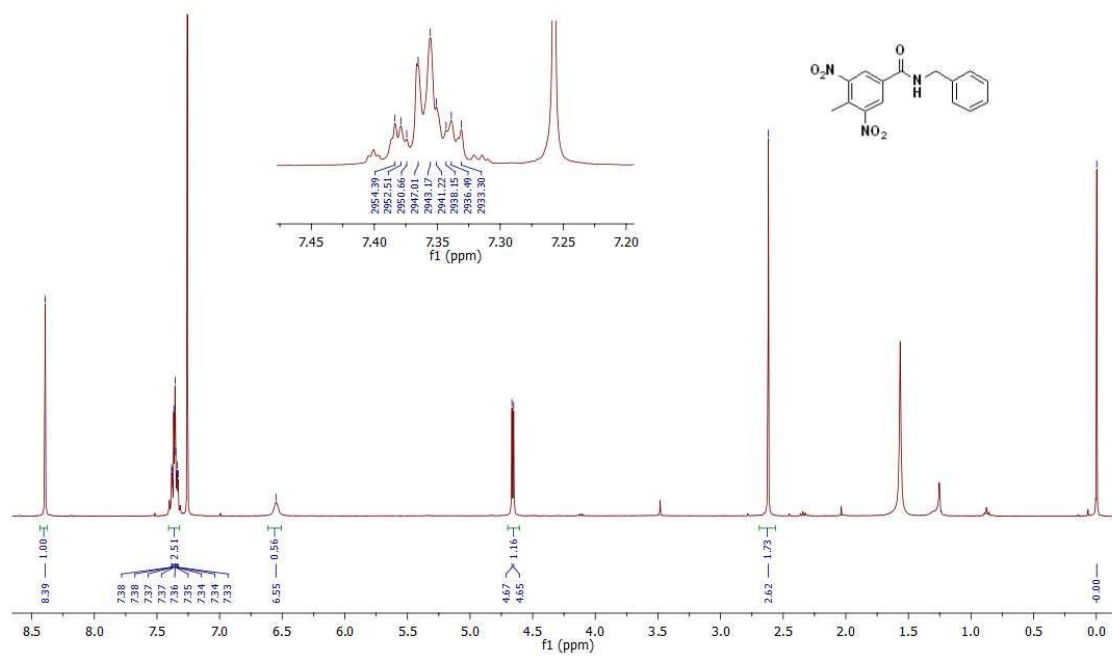

$^{13}\text{C}$  NMR (126 MHz, Acetone- $d_6$ ) of compound **9b**:

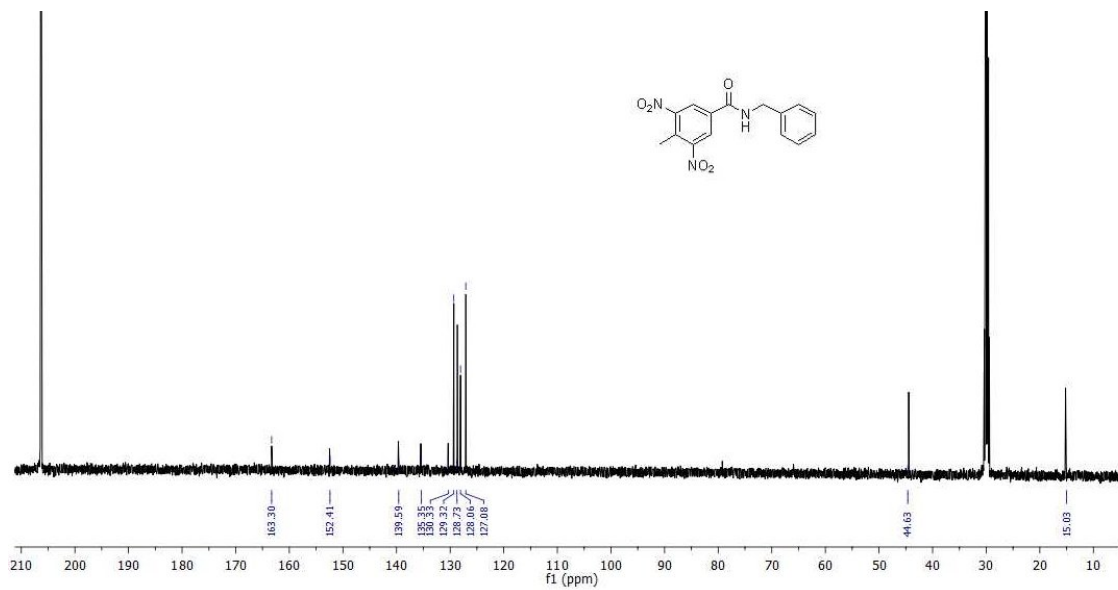

DEPT (126 MHz, Acetone- $d_6$ ) of compound **9b**:

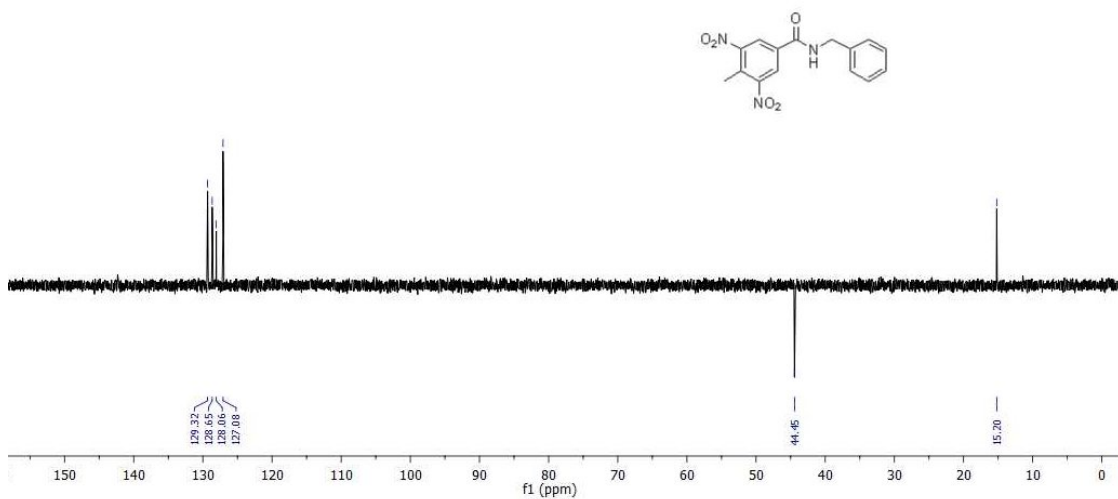

HRMS (ESI-TOF) of compound **9b**:

**Qualitative Compound Report**

Data File: 100.d  
 Sample Type: Sample  
 Instrument Name: Instrument 1  
 Acq Method: vishal\_neg12-01-13.m  
 IRM Calibration Status: Success  
 Comment:

Sample Name: 100  
 Position: Vial 11  
 User Name:  
 Acquired Time: 06-03-2013 PM 4:33:24  
 DA Method: SamplePurity-Default.m

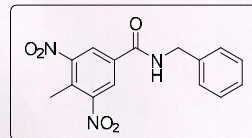

Sample Group: Info.  
 Acquisition SW: 6200 series TOF/6500 series  
 Version: Q-TOF B.05.01 (B5125)

**Compound Table**

| Compound Label       | RT    | Mass     | Formula       | MFG Formula   | MFG Diff (ppm) | DB Formula    |
|----------------------|-------|----------|---------------|---------------|----------------|---------------|
| Cpd 5: C15 H13 N3 O5 | 0.193 | 315.0859 | C15 H13 N3 O5 | C15 H13 N3 O5 | -1.2           | C15 H13 N3 O5 |

| Compound Label       | m/z      | RT    | Algorithm                 | Mass     |
|----------------------|----------|-------|---------------------------|----------|
| Cpd 5: C15 H13 N3 O5 | 314.0787 | 0.193 | Find by Molecular Feature | 315.0859 |

MFE MS Spectrum

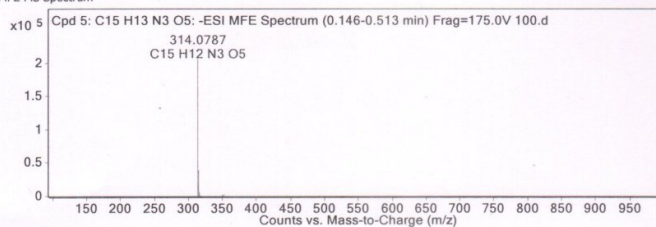

**MS Spectrum Peak List**

| m/z      | z  | Abund     | Formula       | Ion     |
|----------|----|-----------|---------------|---------|
| 314.0787 | -1 | 211157.81 | C15 H12 N3 O5 | (M-H)-  |
| 315.0815 | -1 | 38568.73  | C15 H12 N3 O5 | (M-H)-  |
| 316.0838 | -1 | 5885.88   | C15 H12 N3 O5 | (M-H)-  |
| 317.0835 | -1 | 1286      | C15 H12 N3 O5 | (M-H)-  |
| 350.0554 | -1 | 3078.83   |               | (M+Cl)- |
| 351.0578 | -1 | 1302.27   |               | (M+Cl)- |
| 352.0514 | -1 | 1904.36   |               | (M+Cl)- |

**Predicted Isotope Match Table**

| Isotope | m/z      | Calc m/z | Diff (ppm) | Abund % | Calc Abund % | Abund Sum % | Calc Abund Sum % |
|---------|----------|----------|------------|---------|--------------|-------------|------------------|
| 1       | 314.0787 | 314.0782 | -1.33      | 100     | 100          | 82.2        | 83.06            |
| 2       | 315.0815 | 315.0812 | -0.87      | 18.27   | 17.65        | 15.01       | 14.66            |
| 3       | 316.0838 | 316.0835 | -0.91      | 2.79    | 2.49         | 2.29        | 2.07             |
| 4       | 317.0835 | 317.086  | 7.91       | 0.61    | 0.26         | 0.5         | 0.21             |

--- End Of Report ---

$^1\text{H}$  NMR (400 MHz,  $\text{CDCl}_3$ ) of compound **9c**:

Aug22-2012- MCD-1(a)  
4-meBenzyl-MeDNB

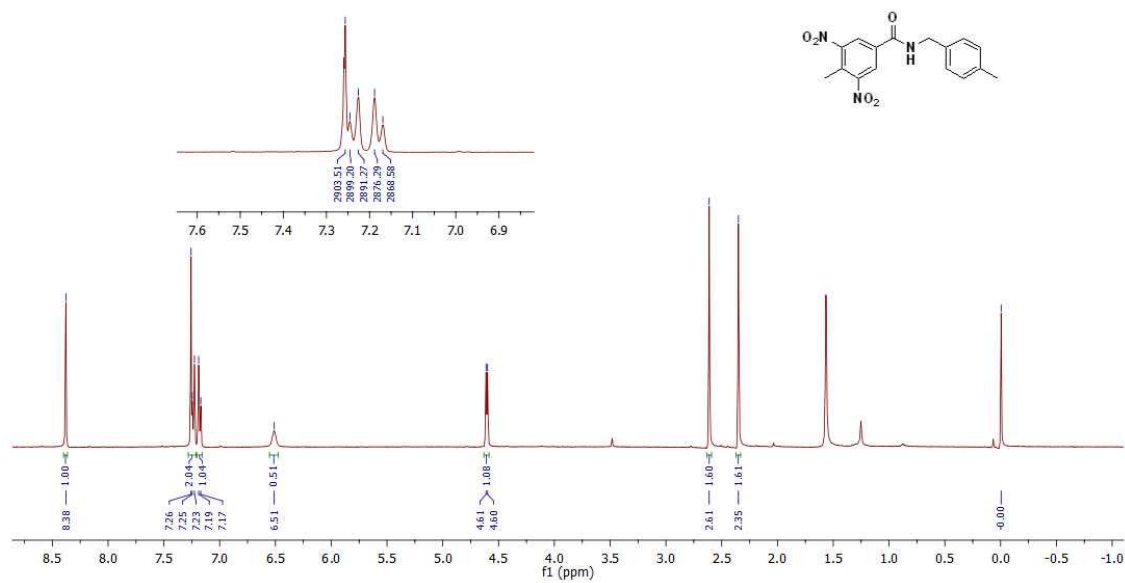

$^{13}\text{C}$  NMR (126 MHz, Acetone- $d_6$ ) of compound **9c**:

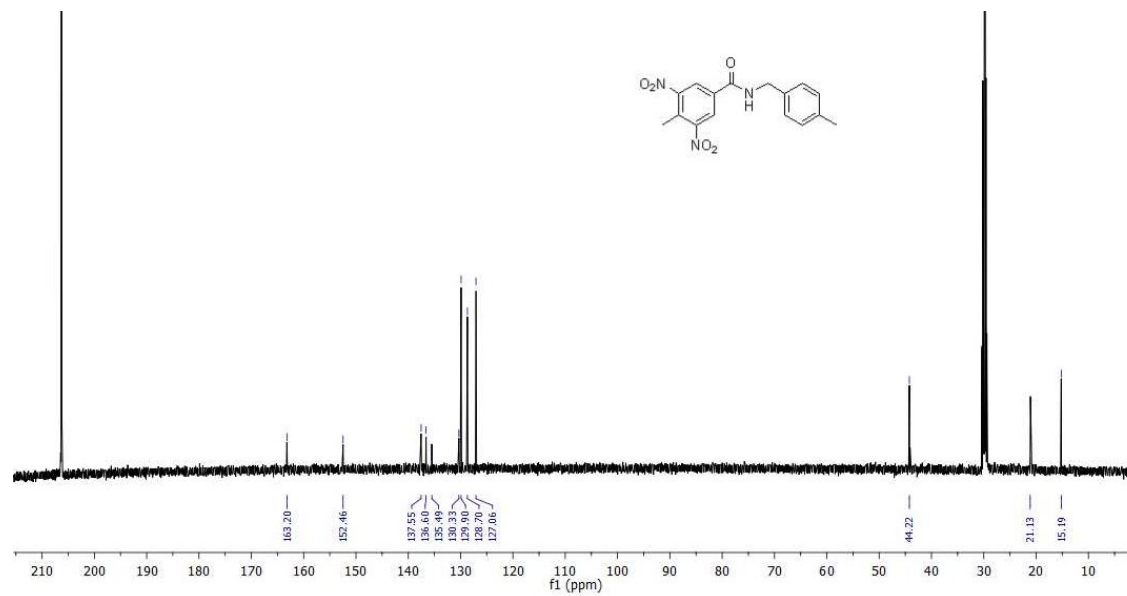

DEPT (126 MHz, Acetone- $d_6$ ) of compound **9c**:

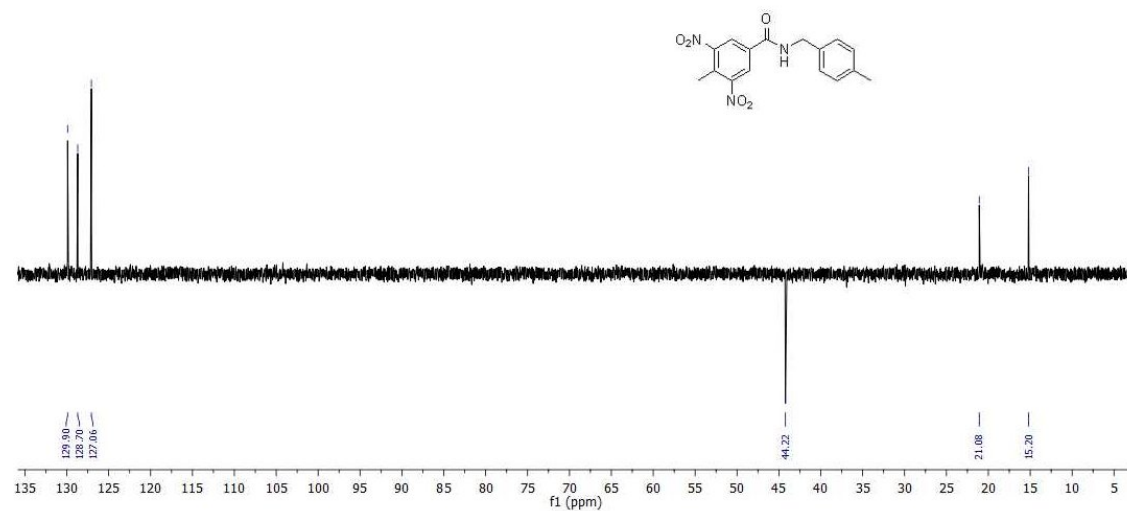

HRMS (ESI-TOF) of compound **9c**:

**Qualitative Compound Report**

|                               |                      |                      |                        |
|-------------------------------|----------------------|----------------------|------------------------|
| <b>Data File</b>              | 97.d                 | <b>Sample Name</b>   | 97                     |
| <b>Sample Type</b>            | Sample               | <b>Position</b>      | Vial 12                |
| <b>Instrument Name</b>        | Instrument 1         | <b>User Name</b>     |                        |
| <b>Acq Method</b>             | vishal_neg12-01-13.m | <b>Acquired Time</b> | 06-03-2013 PM 4:40:55  |
| <b>IRM Calibration Status</b> | Success              | <b>DA Method</b>     | SamplePurity-Default.m |
| <b>Comment</b>                |                      |                      |                        |

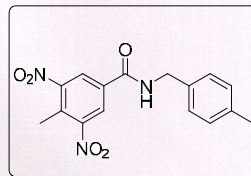

|                       |                             |              |
|-----------------------|-----------------------------|--------------|
| <b>Sample Group</b>   |                             | <b>Info.</b> |
| <b>Acquisition SW</b> | 6200 series TOF/6500 series |              |
| <b>Version</b>        | Q-TOF B.05.01 (B5125)       |              |

**Compound Table**

| Compound Label       | RT    | Mass     | Formula       | MFG Formula   | MFG Diff (ppm) | DB Formula    |
|----------------------|-------|----------|---------------|---------------|----------------|---------------|
| Cpd 5: C16 H15 N3 O5 | 0.189 | 329.1016 | C16 H15 N3 O5 | C16 H15 N3 O5 | -1.16          | C16 H15 N3 O5 |

| Compound Label       | m/z      | RT    | Algorithm                 | Mass     |
|----------------------|----------|-------|---------------------------|----------|
| Cpd 5: C16 H15 N3 O5 | 328.0943 | 0.189 | Find by Molecular Feature | 329.1016 |

**MFE MS Spectrum**

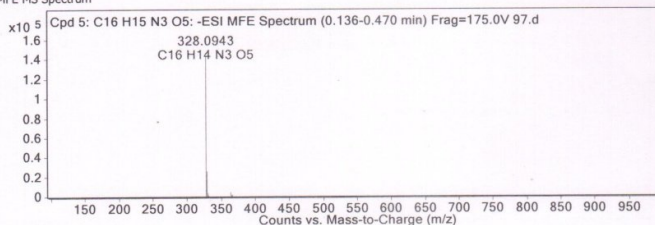

**MS Spectrum Peak List**

| m/z      | z  | Abund     | Formula       | Ion     |
|----------|----|-----------|---------------|---------|
| 328.0943 | -1 | 143199.56 | C16 H14 N3 O5 | (M-H)-  |
| 329.0973 | -1 | 25317.36  | C16 H14 N3 O5 | (M-H)-  |
| 330.0989 | -1 | 3646.56   | C16 H14 N3 O5 | (M-H)-  |
| 331.0982 | -1 | 577.49    | C16 H14 N3 O5 | (M-H)-  |
| 364.0709 | -1 | 3867.98   |               | (M+Cl)- |
| 365.0769 | -1 | 1321.15   |               | (M+Cl)- |
| 366.0681 | -1 | 1429.23   |               | (M+Cl)- |

**Predicted Isotope Match Table**

| Isotope | m/z      | Calc m/z | Diff (ppm) | Abund % | Calc Abund % | Abund Sum % | Calc Abund Sum % |
|---------|----------|----------|------------|---------|--------------|-------------|------------------|
| 1       | 328.0943 | 328.0939 | -1.26      | 100     | 100          | 82.9        | 82.15            |
| 2       | 329.0973 | 329.0969 | -1.21      | 17.68   | 18.75        | 14.66       | 15.41            |
| 3       | 330.0989 | 330.0992 | 0.99       | 2.55    | 2.69         | 2.11        | 2.21             |
| 4       | 331.0982 | 331.1017 | 10.73      | 0.4     | 0.28         | 0.33        | 0.23             |

--- End Of Report ---

<sup>1</sup>H NMR (400 MHz, CDCl<sub>3</sub>) of compound **9d**:

4-me-benzyl-DNB  
4-me Benzyl-DNB

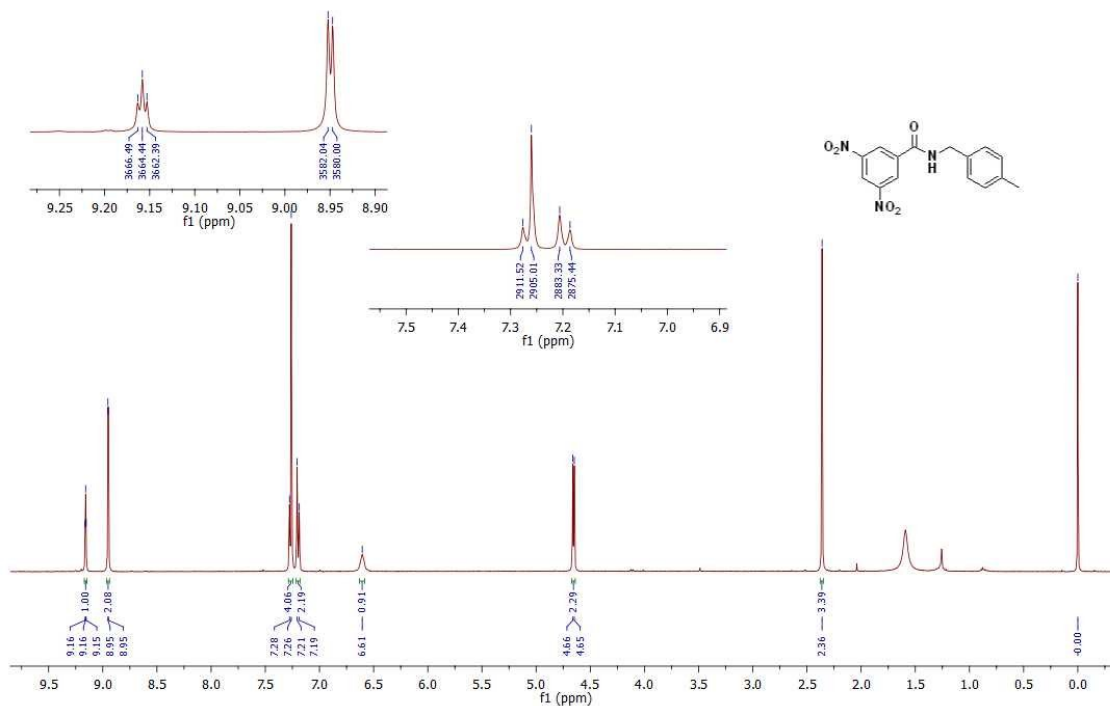

<sup>13</sup>C NMR (126 MHz, Acetone-d<sub>6</sub>) of compound **9d**:

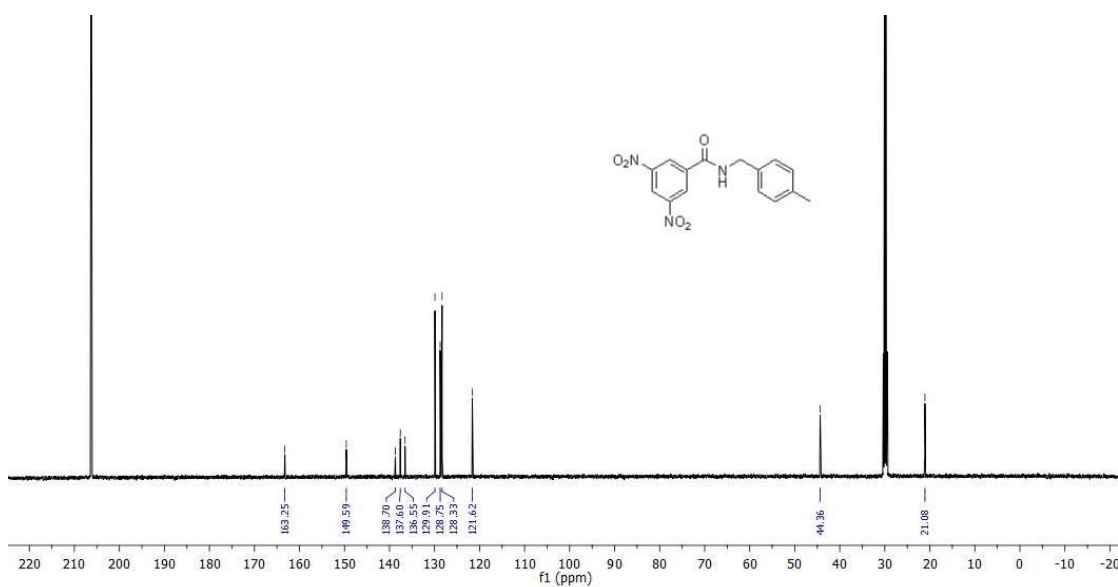



DEPT (126 MHz, Acetone-d<sub>6</sub>) of compound **9d**:

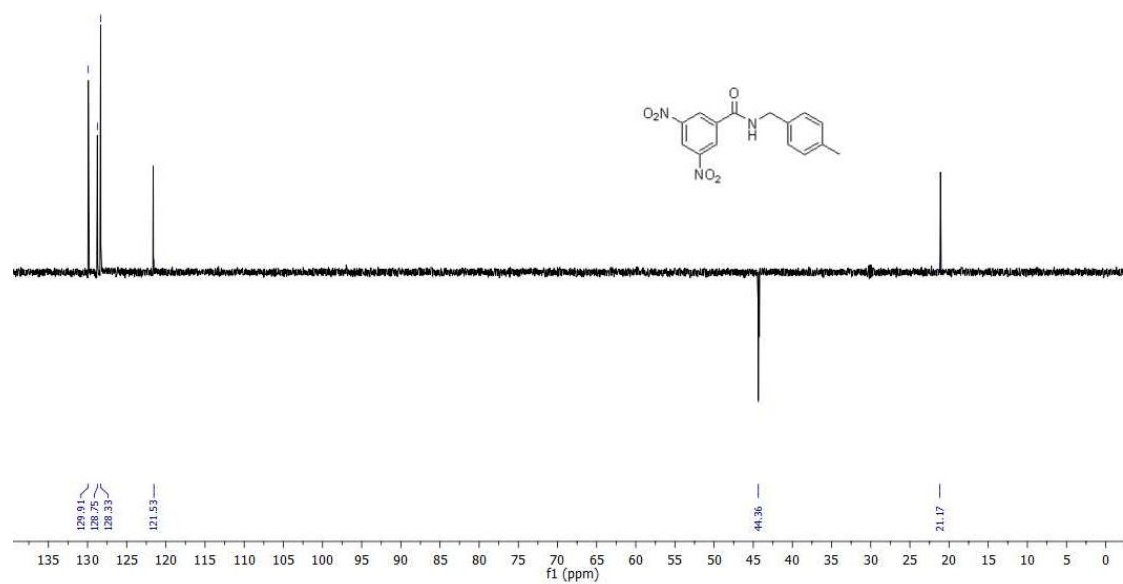

HRMS (ESI-TOF) of compound **9d**:

Qualitative Compound Report

|                               |                      |                      |                        |
|-------------------------------|----------------------|----------------------|------------------------|
| <b>Data File</b>              | 90.d                 | <b>Sample Name</b>   | 90                     |
| <b>Sample Type</b>            | Sample               | <b>Position</b>      | Vial 16                |
| <b>Instrument Name</b>        | Instrument 1         | <b>User Name</b>     |                        |
| <b>Acq Method</b>             | vishal_neg12-01-13.m | <b>Acquired Time</b> | 06-03-2013 PM 5:00:38  |
| <b>IRM Calibration Status</b> | Success              | <b>DA Method</b>     | SamplePurity-Default.m |
| <b>Comment</b>                |                      |                      |                        |

  

|                       |                             |              |
|-----------------------|-----------------------------|--------------|
| <b>Sample Group</b>   |                             | <b>Info.</b> |
| <b>Acquisition SW</b> | 6200 series TOF/6500 series |              |
| <b>Version</b>        | Q-TOF B.05.01 (B5125)       |              |

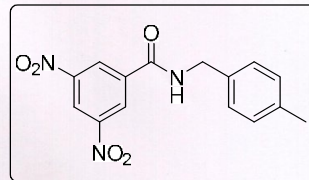

Compound Table

| Compound Label       | RT    | Mass     | Formula       | MFG Formula   | MFG Diff (ppm) | DB Formula    |
|----------------------|-------|----------|---------------|---------------|----------------|---------------|
| Cpd 8: C15 H13 N3 O5 | 0.191 | 315.0854 | C15 H13 N3 O5 | C15 H13 N3 O5 | 0.28           | C15 H13 N3 O5 |

| Compound Label       | m/z      | RT    | Algorithm                 | Mass     |
|----------------------|----------|-------|---------------------------|----------|
| Cpd 8: C15 H13 N3 O5 | 314.0782 | 0.191 | Find by Molecular Feature | 315.0854 |

MFE MS Spectrum

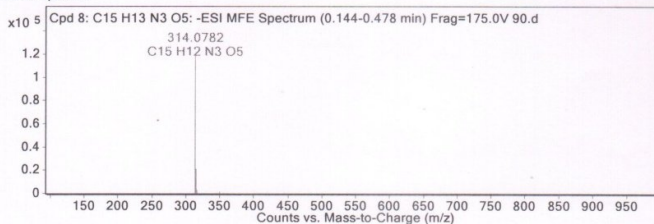

MS Spectrum Peak List

| m/z      | z  | Abund     | Formula          | Ion     |
|----------|----|-----------|------------------|---------|
| 314.0782 | -1 | 120876.75 | C15 H12 N3 O5    | (M-H)-  |
| 315.0811 | -1 | 21042.51  | C15 H12 N3 O5    | (M-H)-  |
| 316.0836 | -1 | 2708.79   | C15 H12 N3 O5    | (M-H)-  |
| 317.0866 | -1 | 318.94    | C15 H12 N3 O5    | (M-H)-  |
| 350.0539 | -1 | 1799.25   | C15 H13 Cl N3 O5 | (M+Cl)- |

Predicted Isotope Match Table

| Isotope | m/z      | Calc m/z | Diff (ppm) | Abund % | Calc Abund % | Abund Sum % | Calc Abund Sum % |
|---------|----------|----------|------------|---------|--------------|-------------|------------------|
| 1       | 314.0782 | 314.0782 | 0.24       | 100     | 100          | 83.39       | 83.06            |
| 2       | 315.0811 | 315.0812 | 0.57       | 17.41   | 17.65        | 14.52       | 14.66            |
| 3       | 316.0836 | 316.0835 | -0.19      | 2.24    | 2.49         | 1.87        | 2.07             |
| 4       | 317.0866 | 317.086  | -2.01      | 0.26    | 0.26         | 0.22        | 0.21             |

--- End Of Report ---

$^1\text{H}$  NMR (400 MHz,  $\text{CDCl}_3$ ) of compound **9e**:

benzyl-dnb  
Benzyl-DNB

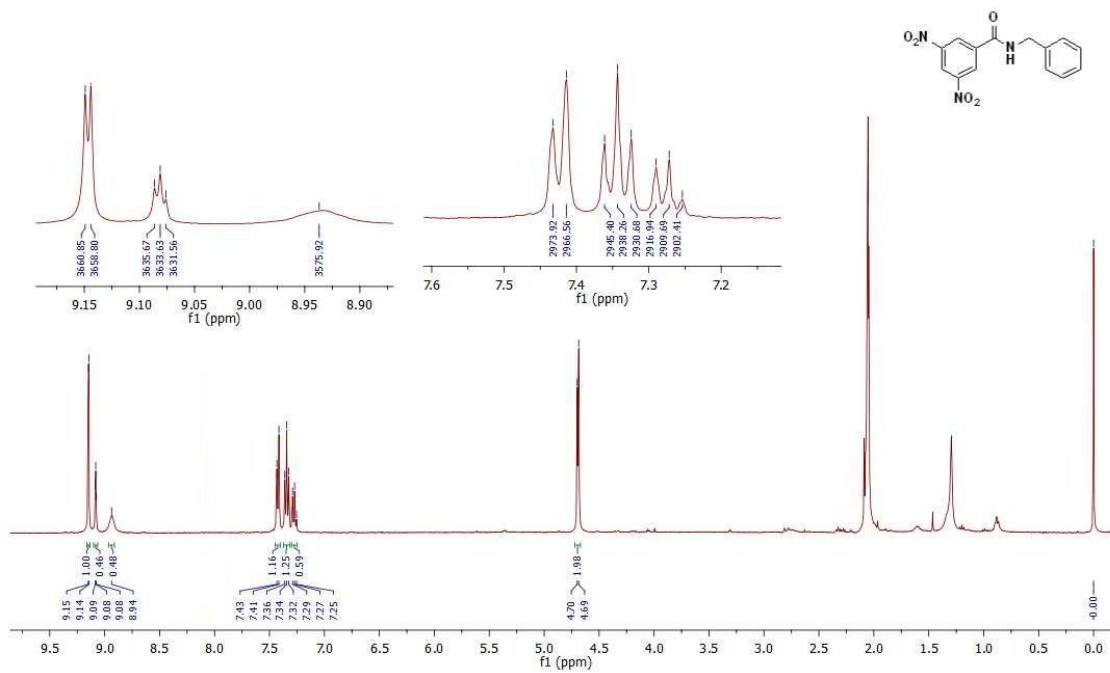

$^{13}\text{C}$  NMR (126 MHz, Acetone- $d_6$ ) of compound **9e**:

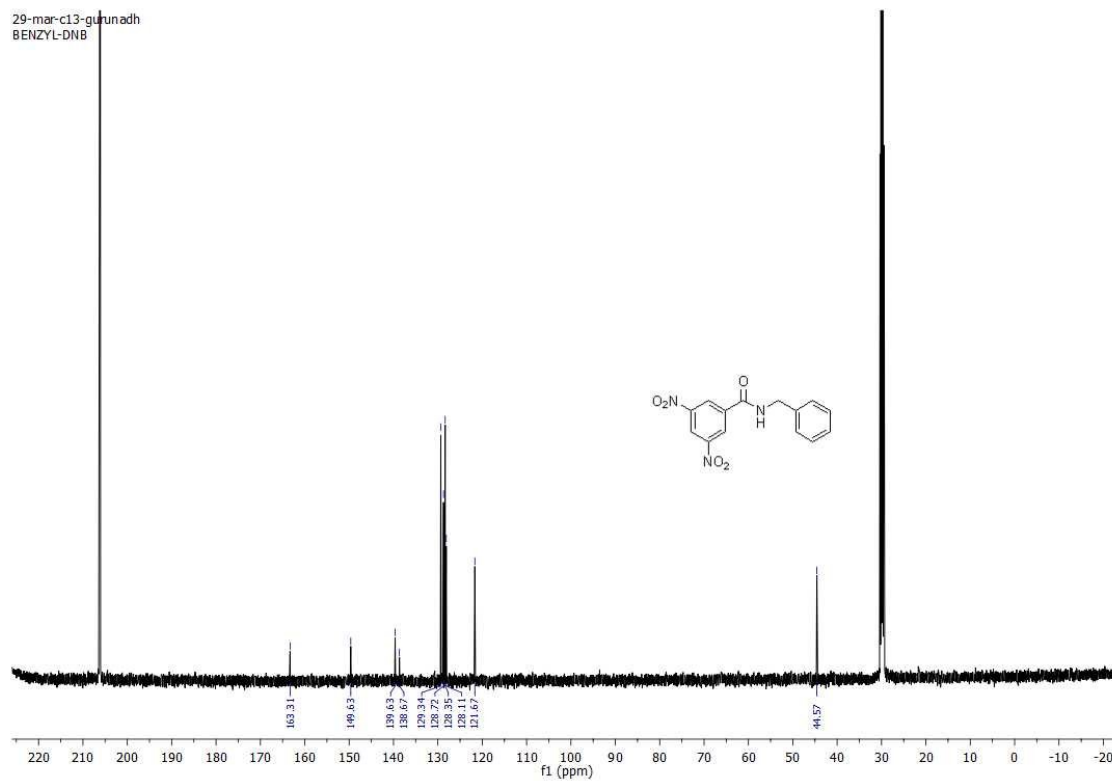

DEPT (126 MHz, Acetone- $d_6$ ) of compound **9e**:

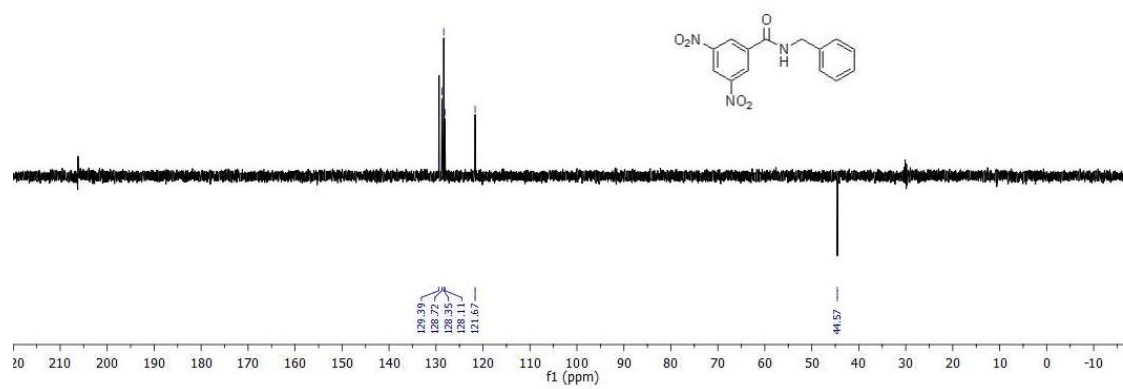

HRMS (ESI-TOF) of compound **9c**:

**Qualitative Compound Report**

**Data File** 95.d **Sample Name** 95  
**Sample Type** Sample **Position** Vial 15  
**Instrument Name** Instrument 1 **User Name**  
**Acq Method** visha\_neg12-01-13.m **Acquired Time** 06-03-2013 PM 4:56:06  
**IRM Calibration Status** Success **DA Method** SamplePurity-Default.m  
**Comment**

**Sample Group** **Info.**  
**Acquisition SW** 6200 series TOF/6500 series  
**Version** Q-TOF B.05.01 (B5125)

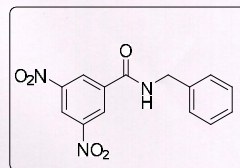

**Compound Table**

| Compound Label       | RT    | Mass     | Formula       | MFG Formula   | MFG Diff (ppm) | DB Formula    |
|----------------------|-------|----------|---------------|---------------|----------------|---------------|
| Cpd 2: C14 H11 N3 O5 | 0.192 | 301.0699 | C14 H11 N3 O5 | C14 H11 N3 O5 | 0              | C14 H11 N3 O5 |

| Compound Label       | m/z      | RT    | Algorithm                 | Mass     |
|----------------------|----------|-------|---------------------------|----------|
| Cpd 2: C14 H11 N3 O5 | 300.0626 | 0.192 | Find by Molecular Feature | 301.0699 |

**MFE MS Spectrum**

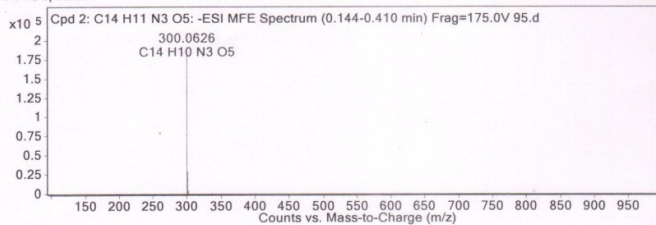

**MS Spectrum Peak List**

| m/z      | z  | Abund     | Formula          | Ion     |
|----------|----|-----------|------------------|---------|
| 300.0626 | -1 | 182599.19 | C14 H10 N3 O5    | (M-H)-  |
| 301.0655 | -1 | 29832.1   | C14 H10 N3 O5    | (M-H)-  |
| 302.0675 | -1 | 4209.35   | C14 H10 N3 O5    | (M-H)-  |
| 303.0685 | -1 | 532.24    | C14 H10 N3 O5    | (M-H)-  |
| 336.0382 | -1 | 1083.18   | C14 H11 Cl N3 O5 | (M+Cl)- |

**Predicted Isotope Match Table**

| Isotope | m/z      | Calc m/z | Diff (ppm) | Abund % | Calc Abund % | Abund Sum % | Calc Abund Sum % |
|---------|----------|----------|------------|---------|--------------|-------------|------------------|
| 1       | 300.0626 | 300.0626 | -0.06      | 100     | 100          | 84.08       | 83.97            |
| 2       | 301.0655 | 301.0656 | 0.16       | 16.34   | 16.54        | 13.74       | 13.89            |
| 3       | 302.0675 | 302.0678 | 0.73       | 2.31    | 2.31         | 1.94        | 1.94             |
| 4       | 303.0685 | 303.0702 | 5.85       | 0.29    | 0.23         | 0.25        | 0.19             |

--- End Of Report ---

$^1\text{H}$  NMR (400 MHz,  $\text{CDCl}_3$ ) of compound **9f**:

Aug22-2012- MCD-1(a)  
4-mePhenethyl-DNB

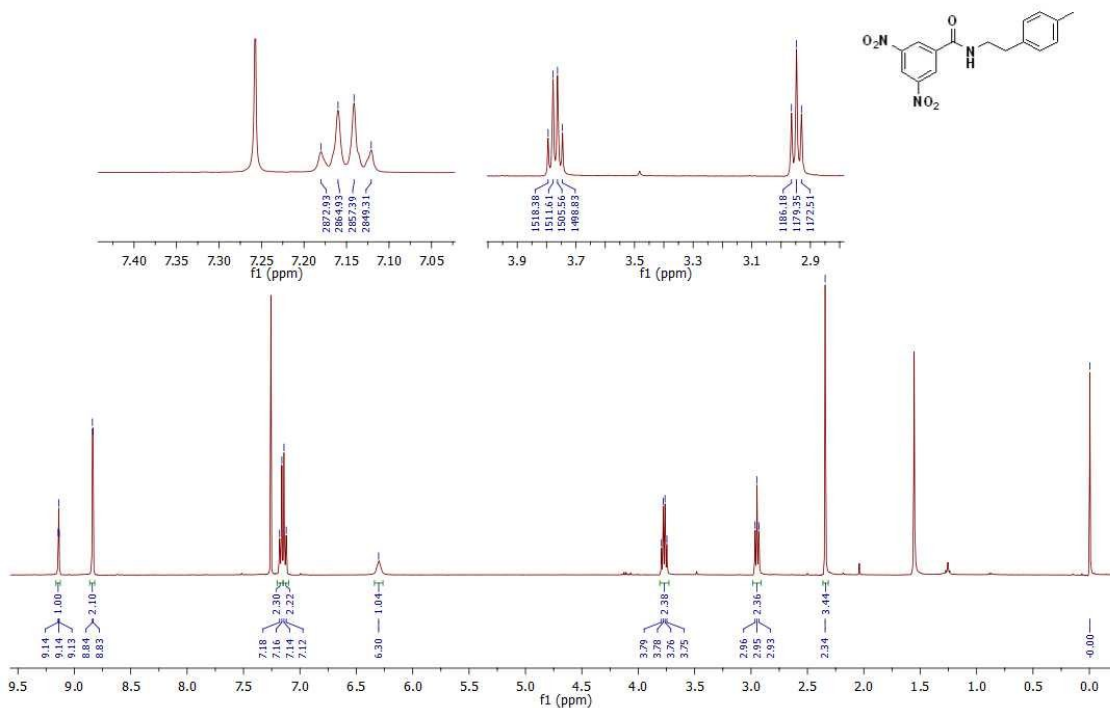

$^{13}\text{C}$  NMR (126 MHz,  $\text{Acetone-d}_6$ ) of compound **9f**:

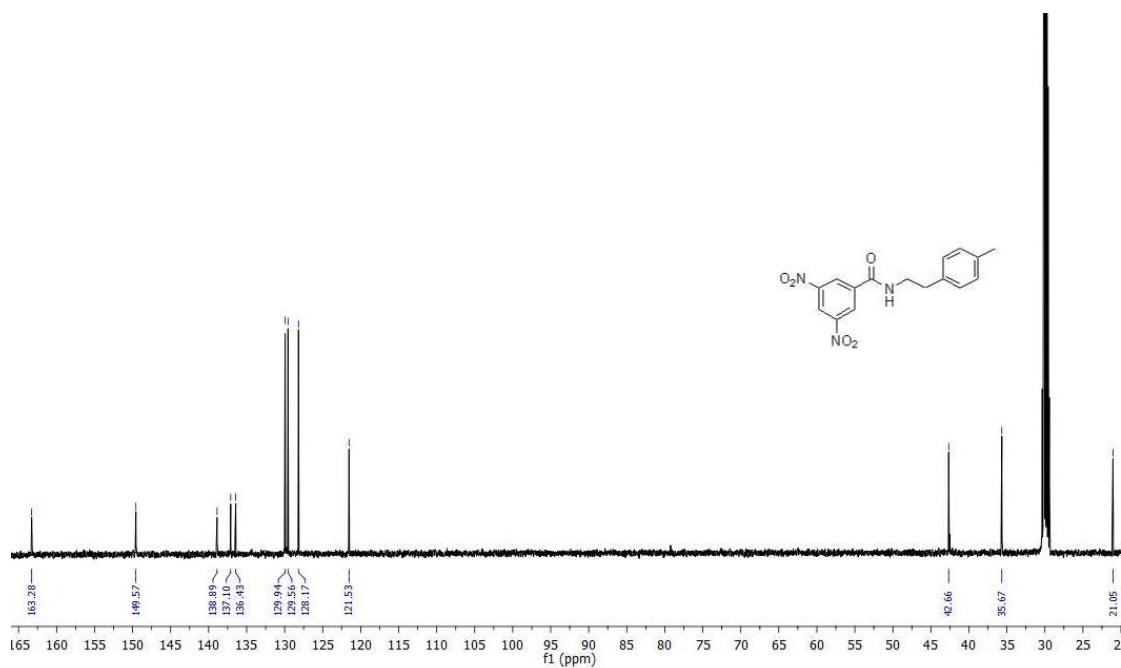

DEPT (126 MHz, Acetone-d<sub>6</sub>) of compound **9f**:

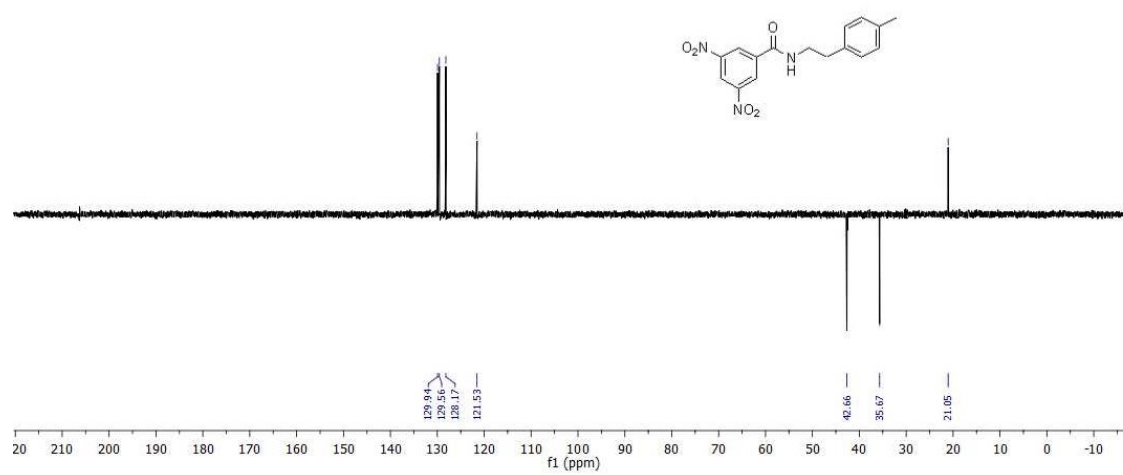

HRMS (ESI-TOF) of compound **9f**:

**Qualitative Compound Report**

|                               |                      |                      |                        |
|-------------------------------|----------------------|----------------------|------------------------|
| <b>Data File</b>              | 101.d                | <b>Sample Name</b>   | 101                    |
| <b>Sample Type</b>            | Sample               | <b>Position</b>      | Vial 2                 |
| <b>Instrument Name</b>        | Instrument 1         | <b>User Name</b>     |                        |
| <b>Acq Method</b>             | vishal_neg12-01-13.m | <b>Acquired Time</b> | 06-03-2013 PM 4:15:02  |
| <b>IRM Calibration Status</b> | Success              | <b>DA Method</b>     | SamplePurity-Default.m |
| <b>Comment</b>                |                      |                      |                        |

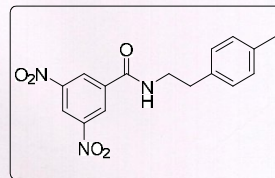

|                       |                             |              |
|-----------------------|-----------------------------|--------------|
| <b>Sample Group</b>   |                             | <b>Info.</b> |
| <b>Acquisition SW</b> | 6200 series TOF/6500 series |              |
| <b>Version</b>        | Q-TOF B.05.01 (B5125)       |              |

**Compound Table**

| Compound Label       | RT    | Mass     | Formula       | MFG Formula   | MFG Diff (ppm) | DB Formula    |
|----------------------|-------|----------|---------------|---------------|----------------|---------------|
| Cpd 2: C16 H15 N3 O5 | 0.191 | 329.0999 | C16 H15 N3 O5 | C16 H15 N3 O5 | 3.74           | C16 H15 N3 O5 |

| Compound Label       | m/z      | RT    | Algorithm                 | Mass     |
|----------------------|----------|-------|---------------------------|----------|
| Cpd 2: C16 H15 N3 O5 | 328.0926 | 0.191 | Find by Molecular Feature | 329.0999 |

MFE MS Spectrum

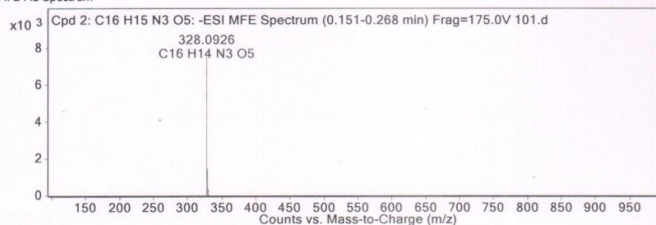

**MS Spectrum Peak List**

| m/z      | z  | Abund   | Formula       | Ion    |
|----------|----|---------|---------------|--------|
| 328.0926 | -1 | 7630.13 | C16 H14 N3 O5 | (M-H)- |
| 329.0963 | -1 | 1446.84 | C16 H14 N3 O5 | (M-H)- |
| 330.0972 | -1 | 347.64  | C16 H14 N3 O5 | (M-H)- |

**Predicted Isotope Match Table**

| Isotope | m/z      | Calc m/z | Diff (ppm) | Abund % | Calc Abund % | Abund Sum % | Calc Abund Sum % |
|---------|----------|----------|------------|---------|--------------|-------------|------------------|
| 1       | 328.0926 | 328.0939 | 4.02       | 100     | 100          | 80.96       | 82.34            |
| 2       | 329.0963 | 329.0969 | 1.76       | 18.96   | 18.75        | 15.35       | 15.44            |
| 3       | 330.0972 | 330.0992 | 6.21       | 4.56    | 2.69         | 3.69        | 2.22             |

--- End Of Report ---



<sup>1</sup>H NMR (400 MHz, CDCl<sub>3</sub>) of compound **9g**:

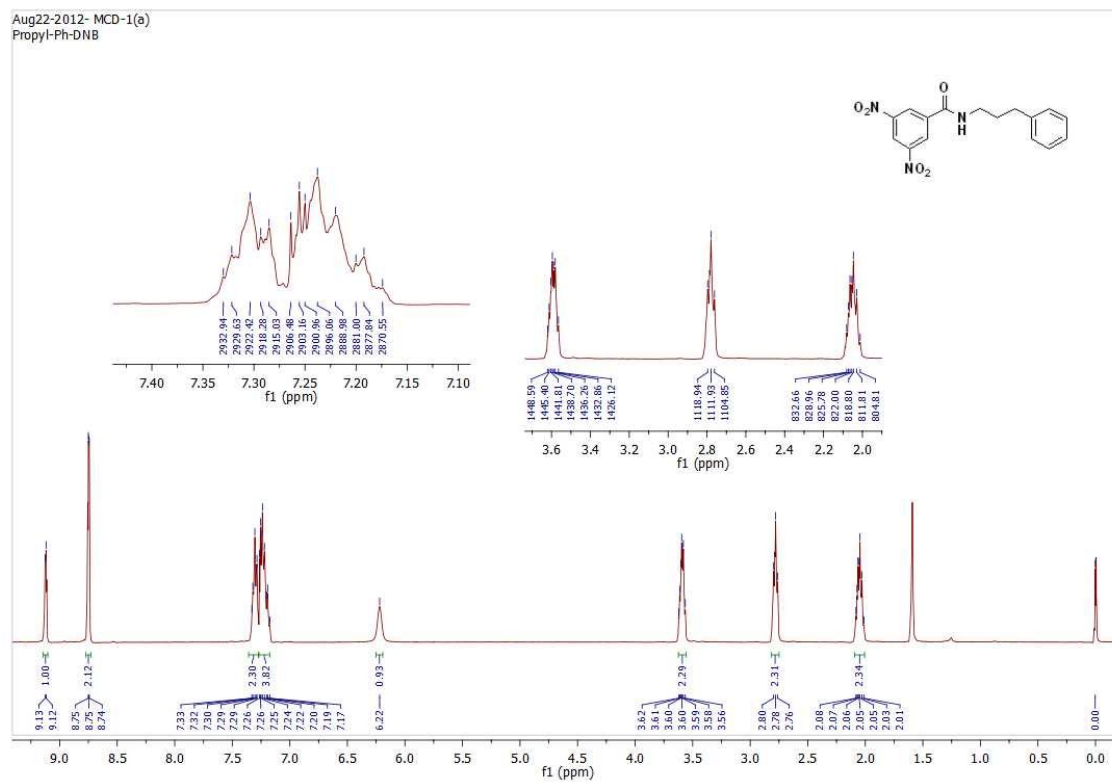

$^{13}\text{C}$  NMR (126 MHz, Acetone- $d_6$ ) of compound **9g**:

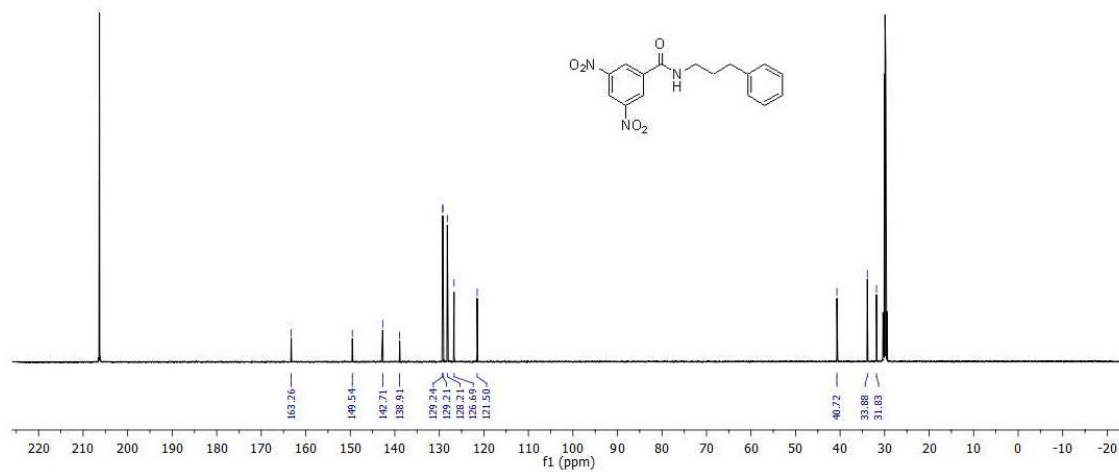

DEPT (126 MHz, Acetone- $d_6$ ) of compound **9g**:

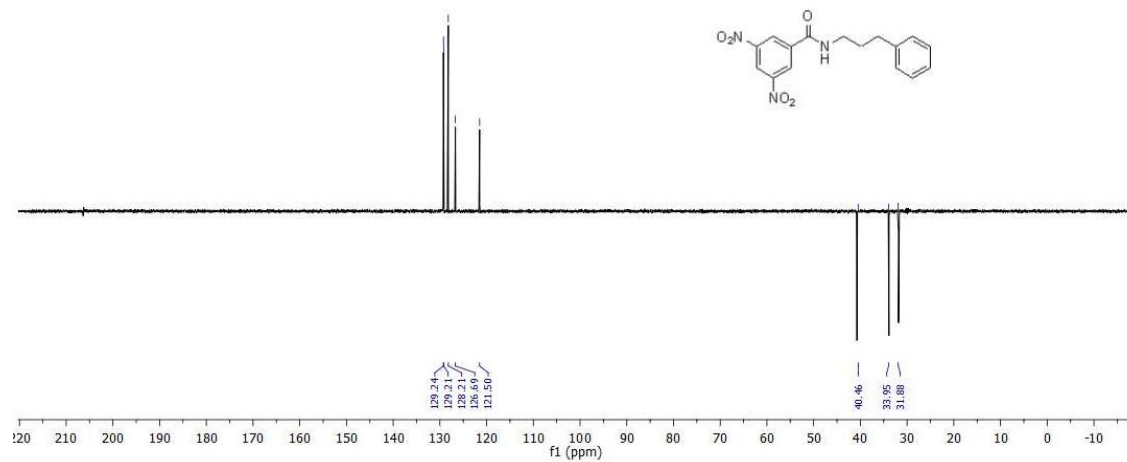

HRMS (ESI-TOF) of compound **9g**:

Qualitative Compound Report

|                               |                                   |                      |                        |
|-------------------------------|-----------------------------------|----------------------|------------------------|
| <b>Data File</b>              | 96.d                              | <b>Sample Name</b>   | Unavailable            |
| <b>Sample Type</b>            | Unavailable                       | <b>Position</b>      | Unavailable            |
| <b>Instrument Name</b>        | Unavailable                       | <b>User Name</b>     | Unavailable            |
| <b>Acq Method</b>             |                                   | <b>Acquired Time</b> | Unavailable            |
| <b>IRM Calibration Status</b> | Success                           | <b>DA Method</b>     | SamplePurity-Default.m |
| <b>Comment</b>                | Sample information is unavailable |                      |                        |

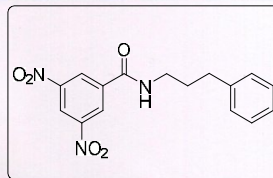

Compound Table

| Compound Label       | RT   | Mass     | Formula       | MFG Formula   | MFG Diff (ppm) | DB Formula    |
|----------------------|------|----------|---------------|---------------|----------------|---------------|
| Cpd 6: C16 H15 N3 O5 | 0.19 | 329.1011 | C16 H15 N3 O5 | C16 H15 N3 O5 | 0.26           | C16 H15 N3 O5 |

| Compound Label       | m/z      | RT   | Algorithm                 | Mass     |
|----------------------|----------|------|---------------------------|----------|
| Cpd 6: C16 H15 N3 O5 | 328.0938 | 0.19 | Find by Molecular Feature | 329.1011 |

MFE MS Spectrum

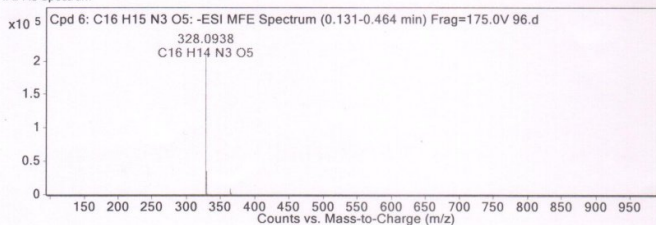

MS Spectrum Peak List

| m/z      | z  | Abund     | Formula          | Ion     |
|----------|----|-----------|------------------|---------|
| 328.0938 | -1 | 209791.05 | C16 H14 N3 O5    | (M-H)-  |
| 329.0969 | -1 | 34655.51  | C16 H14 N3 O5    | (M-H)-  |
| 330.0999 | -1 | 5948.92   | C16 H14 N3 O5    | (M-H)-  |
| 331.1015 | -1 | 742.01    | C16 H14 N3 O5    | (M-H)-  |
| 364.0704 | -1 | 8729.43   | C16 H15 Cl N3 O5 | (M+Cl)- |
| 365.0728 | -1 | 2112.05   | C16 H15 Cl N3 O5 | (M+Cl)- |
| 366.0681 | -1 | 2267.78   | C16 H15 Cl N3 O5 | (M+Cl)- |

Predicted Isotope Match Table

| Isotope | m/z      | Calc m/z | Diff (ppm) | Abund % | Calc Abund % | Abund Sum % | Calc Abund Sum % |
|---------|----------|----------|------------|---------|--------------|-------------|------------------|
| 1       | 328.0938 | 328.0939 | 0.36       | 100     | 100          | 83.54       | 82.15            |
| 2       | 329.0969 | 329.0969 | 0.07       | 16.52   | 18.75        | 13.8        | 15.41            |
| 3       | 330.0999 | 330.0992 | -2.04      | 2.84    | 2.69         | 2.37        | 2.21             |
| 4       | 331.1015 | 331.1017 | 0.79       | 0.35    | 0.28         | 0.3         | 0.23             |

--- End Of Report ---

$^1\text{H}$  NMR (400 MHz,  $\text{CDCl}_3$ ) of compound **9h**:

Aug22-2012- MCD-1(a)  
Butyl-Ph-DNB

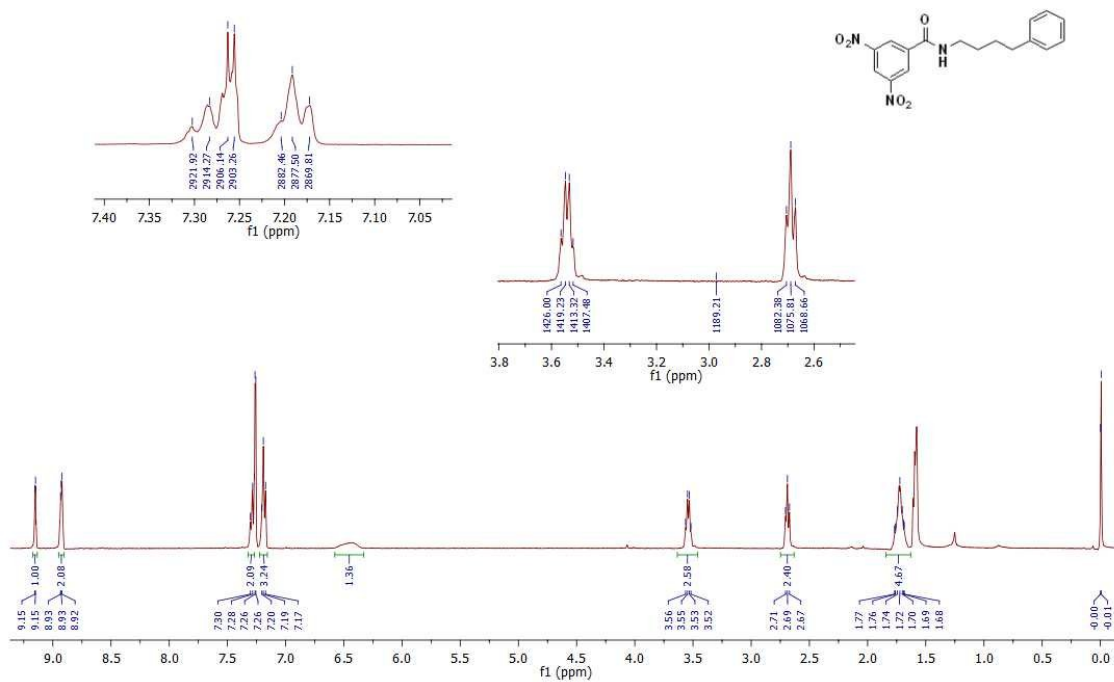

$^{13}\text{C}$  NMR (126 MHz, Acetone- $d_6$ ) of compound **9h**:

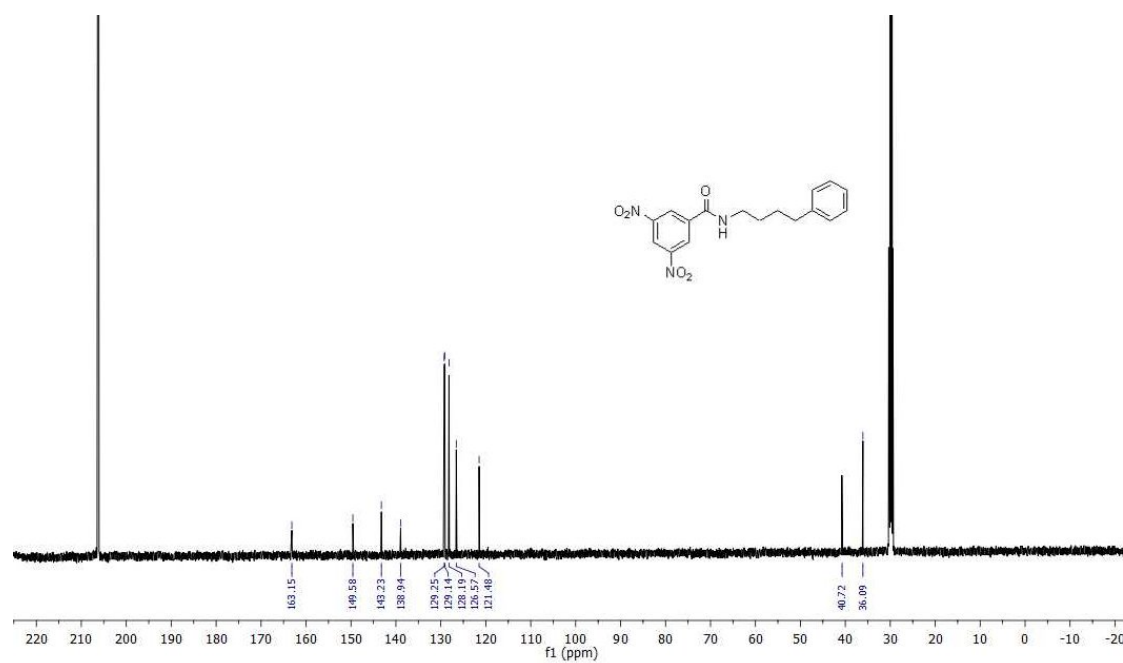

DEPT (126 MHz, Acetone- $d_6$ ) of compound **9h**:

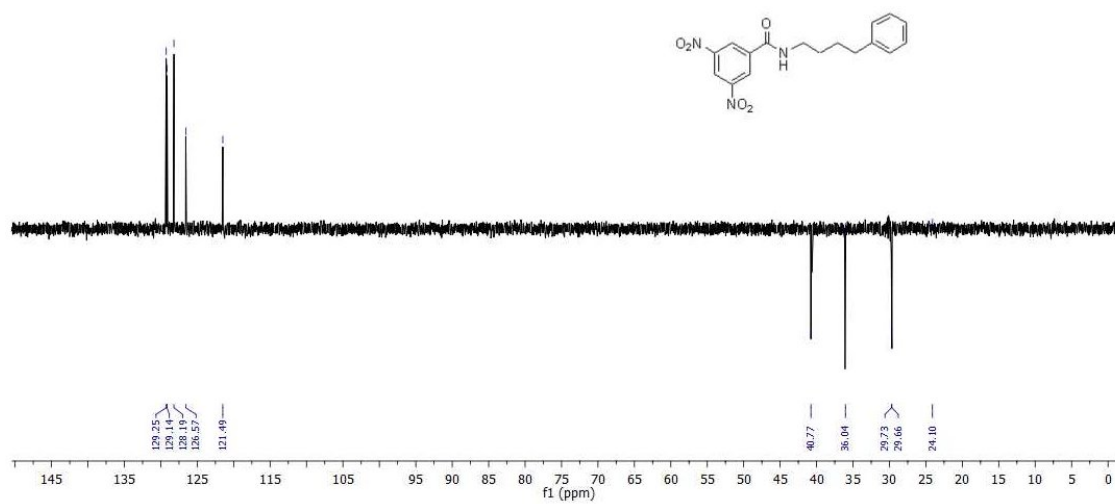

HRMS (ESI-TOF) of compound **9h**:

**Qualitative Compound Report**

Data File: 98.d  
 Sample Type: Sample  
 Instrument Name: Instrument 1  
 Acq Method: vishal\_neg12-01-13.m  
 IRM Calibration Status: Success  
 Comment:

Sample Name: 98  
 Position: Vial 20  
 User Name:  
 Acquired Time: 06-03-2013 PM 5:23:31  
 DA Method: SamplePurity-Default.m

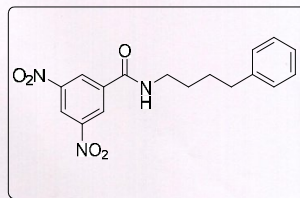

Sample Group: Info.  
 Acquisition SW: 6200 series TOF/6500 series  
 Version: Q-TOF B.05.01 (B5125)

**Compound Table**

| Compound Label       | RT    | Mass     | Formula       | MFG Formula   | MFG Diff (ppm) | DB Formula    |
|----------------------|-------|----------|---------------|---------------|----------------|---------------|
| Cpd 5: C17 H17 N3 O5 | 0.192 | 343.1168 | C17 H17 N3 O5 | C17 H17 N3 O5 | -0.08          | C17 H17 N3 O5 |

| Compound Label       | m/z      | RT    | Algorithm                 | Mass     |
|----------------------|----------|-------|---------------------------|----------|
| Cpd 5: C17 H17 N3 O5 | 342.1095 | 0.192 | Find by Molecular Feature | 343.1168 |

**MFE MS Spectrum**

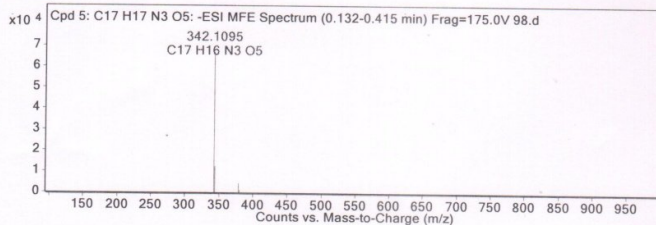

**MS Spectrum Peak List**

| m/z      | z  | Abund    | Formula          | Ion     |
|----------|----|----------|------------------|---------|
| 342.1095 | -1 | 66890.43 | C17 H16 N3 O5    | (M-H)-  |
| 343.1129 | -1 | 12550.85 | C17 H16 N3 O5    | (M-H)-  |
| 344.116  | -1 | 1956.42  | C17 H16 N3 O5    | (M-H)-  |
| 378.0859 | -1 | 4526.63  | C17 H17 Cl N3 O5 | (M+Cl)- |
| 379.0903 | -1 | 817      | C17 H17 Cl N3 O5 | (M+Cl)- |
| 380.0839 | -1 | 1149.73  | C17 H17 Cl N3 O5 | (M+Cl)- |

**Predicted Isotope Match Table**

| Isotope | m/z      | Calc m/z | Diff (ppm) | Abund % | Calc Abund % | Abund Sum % | Calc Abund Sum % |
|---------|----------|----------|------------|---------|--------------|-------------|------------------|
| 1       | 342.1095 | 342.1095 | 0.17       | 100     | 100          | 82.18       | 81.46            |
| 2       | 343.1129 | 343.1126 | -0.94      | 18.76   | 19.86        | 15.42       | 16.18            |
| 3       | 344.116  | 344.115  | -2.89      | 2.92    | 2.9          | 2.4         | 2.36             |

--- End Of Report ---

$^1\text{H}$  NMR (400 MHz,  $\text{CDCl}_3$ ) of compound **10a**:

May09-2012-pumima  
4-F-DNB

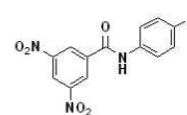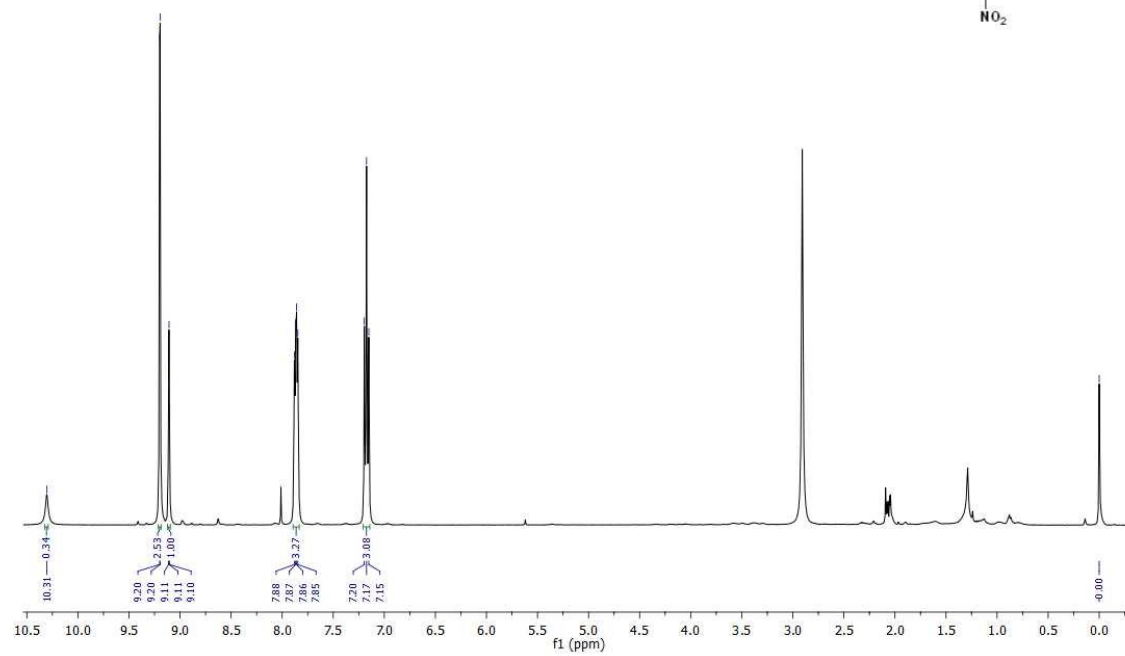

HRMS (ESI-TOF) of compound 10a:

Qualitative Compound Report

Data File 60.d Sample Name 60  
 Sample Type Sample Position Vial 24  
 Instrument Name Instrument 1 User Name  
 Acq Method vishal\_neg12-01-13.m Acquired Time 04-03-2013 PM 3:54:47  
 IRM Calibration Status Success DA Method SamplePurity-Default.m  
 Comment  
 Sample Group Info.  
 Acquisition SW 6200 series TOF/6500 series  
 Version Q-TOF B.05.01 (B5125)

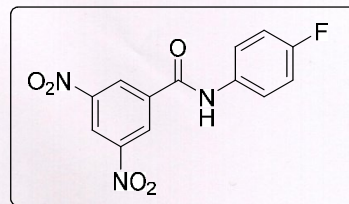

Compound Table

| Compound Label        | RT    | Mass     | Formula        | MFG Formula    | MFG Diff (ppm) | DB Formula     |
|-----------------------|-------|----------|----------------|----------------|----------------|----------------|
| Cpd 5: C13 H8 F N3 O5 | 0.194 | 305.0453 | C13 H8 F N3 O5 | C13 H8 F N3 O5 | -1.56          | C13 H8 F N3 O5 |

| Compound Label        | m/z     | RT    | Algorithm                 | Mass     |
|-----------------------|---------|-------|---------------------------|----------|
| Cpd 5: C13 H8 F N3 O5 | 304.038 | 0.194 | Find by Molecular Feature | 305.0453 |

MFE MS Spectrum

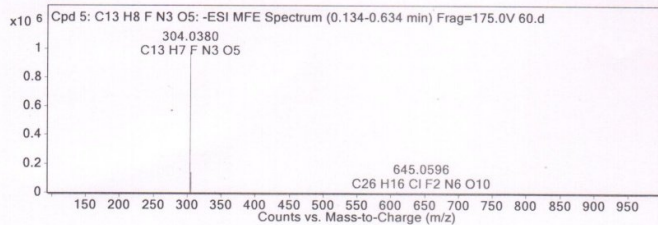

MS Spectrum Peak List

| m/z      | z  | Abund     | Formula              | Ion      |
|----------|----|-----------|----------------------|----------|
| 304.038  | -1 | 975104.75 | C13 H7 F N3 O5       | (M-H)-   |
| 305.0411 | -1 | 140109.38 | C13 H7 F N3 O5       | (M-H)-   |
| 306.043  | -1 | 18894.85  | C13 H7 F N3 O5       | (M-H)-   |
| 307.0466 | -1 | 2044.24   | C13 H7 F N3 O5       | (M-H)-   |
| 340.0146 | -1 | 6072.72   | C13 H8 Cl F N3 O5    | (M+Cl)-  |
| 342.012  | -1 | 2337.86   | C13 H8 Cl F N3 O5    | (M+Cl)-  |
| 609.0827 | -1 | 4074.4    | C26 H15 F2 N6 O10    | (2M-H)-  |
| 645.0596 | -1 | 5595.32   | C26 H16 Cl F2 N6 O10 | (2M+Cl)- |
| 646.0627 | -1 | 1941.91   | C26 H16 Cl F2 N6 O10 | (2M+Cl)- |
| 647.0562 | -1 | 1559.75   | C26 H16 Cl F2 N6 O10 | (2M+Cl)- |

Predicted Isotope Match Table

| Isotope | m/z      | Calc m/z | Diff (ppm) | Abund % | Calc Abund % | Abund Sum % | Calc Abund Sum % |
|---------|----------|----------|------------|---------|--------------|-------------|------------------|
| 1       | 304.038  | 304.0375 | -1.5       | 100     | 100          | 85.83       | 84.91            |
| 2       | 305.0411 | 305.0405 | -1.99      | 14.37   | 15.43        | 12.33       | 13.1             |
| 3       | 306.043  | 306.0426 | -1.41      | 1.94    | 2.14         | 1.66        | 1.82             |
| 4       | 307.0466 | 307.0451 | -4.93      | 0.21    | 0.21         | 0.18        | 0.18             |

--- End Of Report ---



<sup>1</sup>H NMR (400 MHz, CDCl<sub>3</sub>) of compound **10b**:

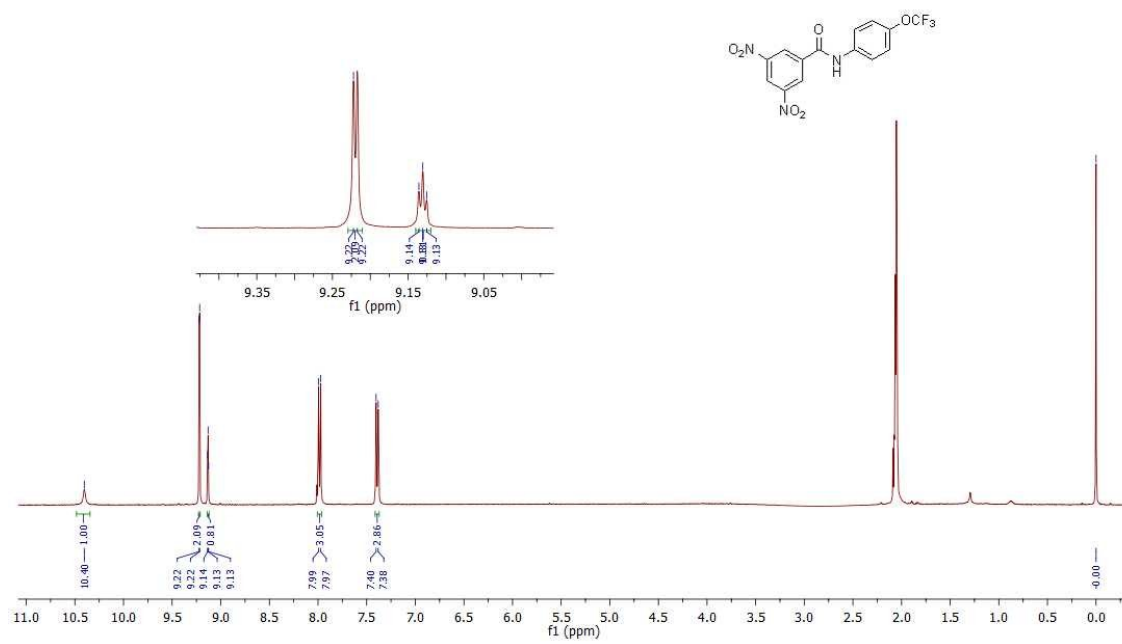

HRMS (ESI-TOF) of compound **10b**:

Qualitative Compound Report

Data File: 110.d Sample Name: 110  
 Sample Type: Sample Position: Vial 27  
 Instrument Name: Instrument 1 User Name:  
 Acq Method: vishal\_neg12-01-13.m Acquired Time: 07-03-2013 PM 5:29:25  
 IRM Calibration Status: Success DA Method: SamplePurity-Default.m  
 Comment:

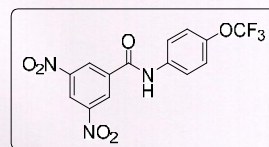

Sample Group: Info.  
 Acquisition SW: 6200 series TOF/6500 series  
 Version: Q-TOF B.05.01 (B5125)

Compound Table

| Compound Label         | RT    | Mass     | Formula         | MFG Formula     | MFG Diff (ppm) | DB Formula      |
|------------------------|-------|----------|-----------------|-----------------|----------------|-----------------|
| Cpd 8: C14 H8 F3 N3 O6 | 0.189 | 371.0368 | C14 H8 F3 N3 O6 | C14 H8 F3 N3 O6 | -0.73          | C14 H8 F3 N3 O6 |

| Compound Label         | m/z      | RT    | Algorithm                 | Mass     |
|------------------------|----------|-------|---------------------------|----------|
| Cpd 8: C14 H8 F3 N3 O6 | 370.0294 | 0.189 | Find by Molecular Feature | 371.0368 |

MFE MS Spectrum

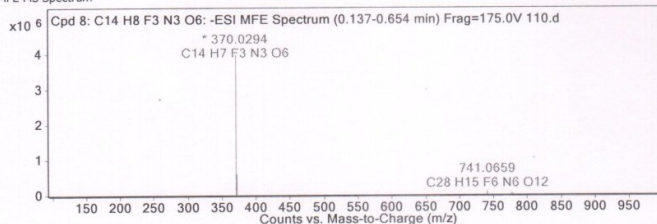

MS Spectrum Peak List

| m/z      | z  | Abund     | Formula            | Ion      |
|----------|----|-----------|--------------------|----------|
| 370.0294 | -1 | 3980783   | C14 H7 F3 N3 O6    | (M-H)-   |
| 371.0332 | -1 | 600660.69 | C14 H7 F3 N3 O6    | (M-H)-   |
| 372.035  | -1 | 85941.88  | C14 H7 F3 N3 O6    | (M-H)-   |
| 373.0372 | -1 | 8095.59   | C14 H7 F3 N3 O6    | (M-H)-   |
| 406.0066 | -1 | 8499.77   | C14 H8 Cl F3 N3 O6 | (M+Cl)-  |
| 741.0659 | -1 | 93075.37  | C28 H15 F6 N6 O12  | (2M-H)-  |
| 742.0688 | -1 | 30319.69  | C28 H15 F6 N6 O12  | (2M-H)-  |
| 777.0421 | -1 | 55560.52  |                    | (2M+Cl)- |
| 778.0451 | -1 | 18611.9   |                    | (2M+Cl)- |
| 779.0409 | -1 | 20188.72  |                    | (2M+Cl)- |

Predicted Isotope Match Table

| Isotope | m/z      | Calc m/z | Diff (ppm) | Abund % | Calc Abund % | Abund Sum % | Calc Abund Sum % |
|---------|----------|----------|------------|---------|--------------|-------------|------------------|
| 1       | 370.0294 | 370.0292 | -0.41      | 100     | 100          | 85.14       | 83.78            |
| 2       | 371.0332 | 371.0322 | -2.68      | 15.09   | 16.55        | 12.85       | 13.86            |
| 3       | 372.035  | 372.0343 | -1.81      | 2.16    | 2.52         | 1.84        | 2.11             |
| 4       | 373.0372 | 373.0368 | -1.03      | 0.2     | 0.27         | 0.17        | 0.22             |
| 5       | 374.0383 | 374.0391 | 1.97       | 0.01    | 0.02         | 0           | 0.02             |

--- End Of Report ---

$^1\text{H}$  NMR (400 MHz,  $\text{CDCl}_3$ ) of compound **10c**:

Aug-24-2012-MCD-1a  
4-CF<sub>3</sub>PhNB

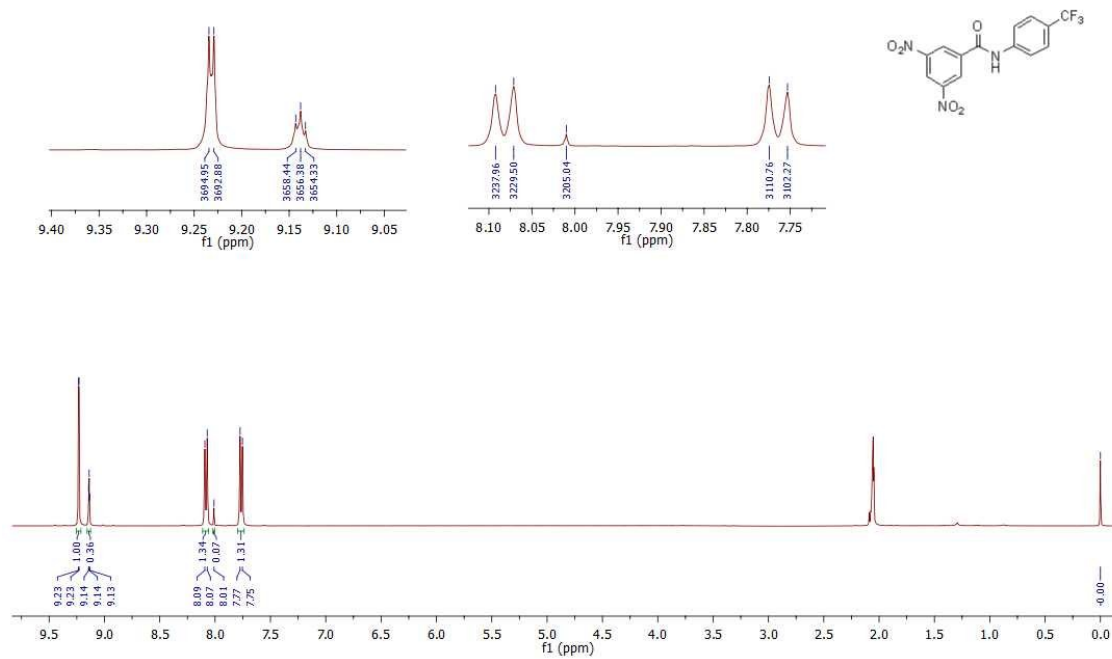

HRMS (ESI-TOF) of compound 10c:

Qualitative Compound Report

Data File: 111.d Sample Name: 111  
 Sample Type: Sample Position: Vial 28  
 Instrument Name: Instrument 1 User Name:  
 Acq Method: vishal\_neg12-01-13.m Acquired Time: 07-03-2013 PM 5:33:56  
 IRM Calibration Status: Success DA Method: SamplePurity-Default.m  
 Comment:

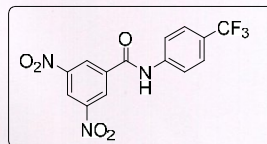

Sample Group: Info.  
 Acquisition SW: 6200 series TOF/6500 series  
 Version: Q-TOF B.05.01 (B5125)

Compound Table

| Compound Label          | RT    | Mass     | Formula         | MFG Formula     | MFG Diff (ppm) | DB Formula      |
|-------------------------|-------|----------|-----------------|-----------------|----------------|-----------------|
| Cpd 17: C14 H8 F3 N3 O5 | 0.192 | 355.0418 | C14 H8 F3 N3 O5 | C14 H8 F3 N3 O5 | -0.62          | C14 H8 F3 N3 O5 |

| Compound Label          | m/z      | RT    | Algorithm                 | Mass     |
|-------------------------|----------|-------|---------------------------|----------|
| Cpd 17: C14 H8 F3 N3 O5 | 354.0345 | 0.192 | Find by Molecular Feature | 355.0418 |

MFE MS Spectrum

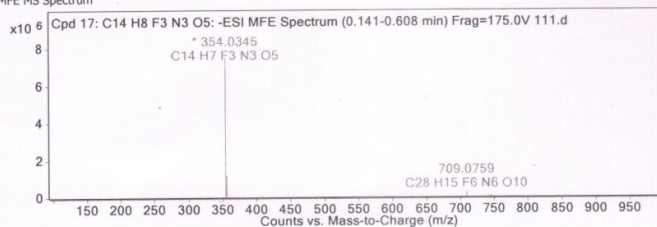

MS Spectrum Peak List

| m/z      | z  | Abund     | Formula              | Ion      |
|----------|----|-----------|----------------------|----------|
| 354.0345 | -1 | 7531740.5 | C14 H7 F3 N3 O5      | (M-H)-   |
| 355.0379 | -1 | 1153634.5 | C14 H7 F3 N3 O5      | (M-H)-   |
| 356.0402 | -1 | 161538.94 | C14 H7 F3 N3 O5      | (M-H)-   |
| 390.0111 | -1 | 12965.01  | C14 H8 Cl F3 N3 O5   | (M+Cl)-  |
| 709.0759 | -1 | 261669.72 | C28 H15 F6 N6 O10    | (2M-H)-  |
| 710.0788 | -1 | 87459.38  | C28 H15 F6 N6 O10    | (2M-H)-  |
| 711.0806 | -1 | 18530.51  | C28 H15 F6 N6 O10    | (2M-H)-  |
| 745.0525 | -1 | 103022.52 | C28 H16 Cl F6 N6 O10 | (2M+Cl)- |
| 746.0549 | -1 | 32834.59  | C28 H16 Cl F6 N6 O10 | (2M+Cl)- |
| 747.0515 | -1 | 37311.26  | C28 H16 Cl F6 N6 O10 | (2M+Cl)- |

Predicted Isotope Match Table

| Isotope | m/z      | Calc m/z | Diff (ppm) | Abund % | Calc Abund % | Abund Sum % | Calc Abund Sum % |
|---------|----------|----------|------------|---------|--------------|-------------|------------------|
| 1       | 354.0345 | 354.0343 | -0.44      | 100     | 100          | 85.01       | 83.99            |
| 2       | 355.0379 | 355.0373 | -1.6       | 15.32   | 16.51        | 13.02       | 13.87            |
| 3       | 356.0402 | 356.0395 | -2.11      | 2.14    | 2.31         | 1.82        | 1.94             |
| 4       | 357.0424 | 357.042  | -1.29      | 0.16    | 0.23         | 0.14        | 0.19             |
| 5       | 358.045  | 358.0443 | -2.1       | 0.01    | 0.02         | 0.01        | 0.02             |

--- End Of Report ---

$^1\text{H}$  NMR (400 MHz,  $\text{CDCl}_3$ ) of compound **10d**:

Aug-24-2012-MCD-1a  
2-CF<sub>3</sub>PhDNB

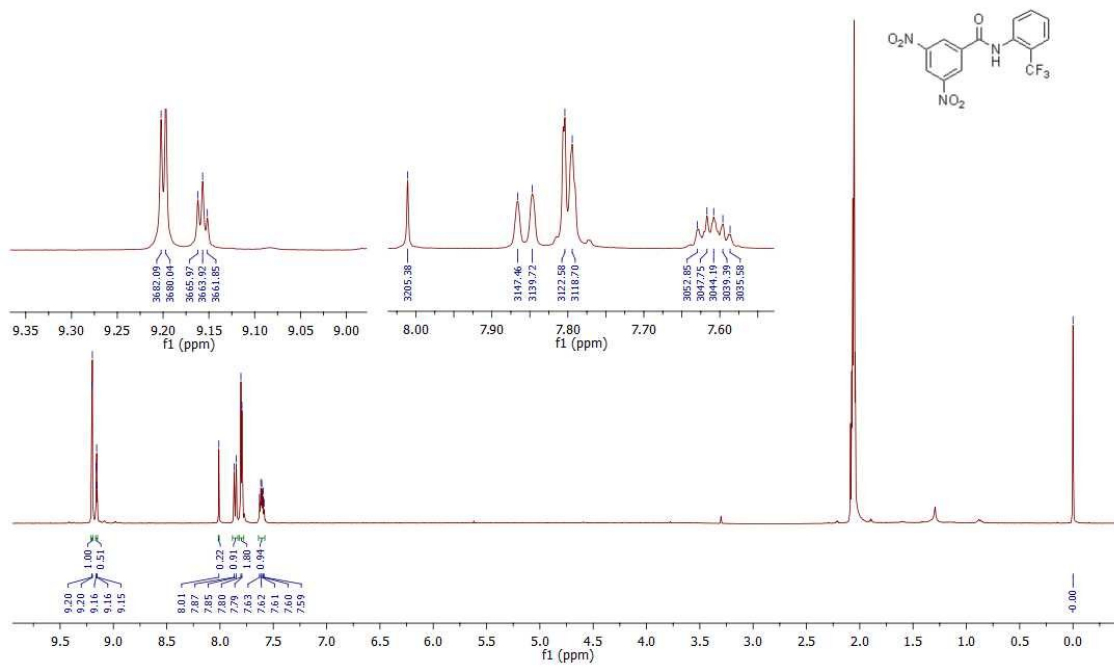

HRMS (ESI-TOF) of compound **10d**:

**Qualitative Compound Report**

**Data File** 112.d **Sample Name** 112  
**Sample Type** Sample **Position** Vial 29  
**Instrument Name** Instrument 1 **User Name**  
**Acq Method** vishal\_neg12-01-13.m **Acquired Time** 07-03-2013 PM 5:38:27  
**IRM Calibration Status** Success **DA Method** SamplePurity-Default.m  
**Comment**

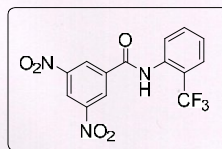

**Sample Group** Info.  
**Acquisition SW** 6200 series TOF/6500 series  
**Version** Q-TOF B.05.01 (B5125)

**Compound Table**

| Compound Label          | RT    | Mass     | Formula         | MFG Formula     | MFG Diff (ppm) | DB Formula      |
|-------------------------|-------|----------|-----------------|-----------------|----------------|-----------------|
| Cpd 22: C14 H8 F3 N3 O5 | 0.189 | 355.0424 | C14 H8 F3 N3 O5 | C14 H8 F3 N3 O5 | -2.28          | C14 H8 F3 N3 O5 |

| Compound Label          | m/z      | RT    | Algorithm                 | Mass     |
|-------------------------|----------|-------|---------------------------|----------|
| Cpd 22: C14 H8 F3 N3 O5 | 354.0351 | 0.189 | Find by Molecular Feature | 355.0424 |

**MFE MS Spectrum**

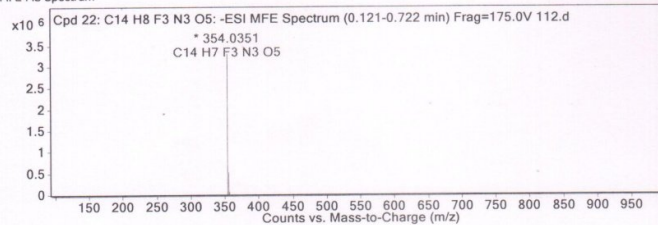

**MS Spectrum Peak List**

| m/z      | z  | Abund     | Formula         | Ion                |
|----------|----|-----------|-----------------|--------------------|
| 354.0351 | -1 | 3299008   | C14 H7 F3 N3 O5 | (M-H) <sup>-</sup> |
| 355.0386 | -1 | 518787.34 | C14 H7 F3 N3 O5 | (M-H) <sup>-</sup> |
| 356.0403 | -1 | 59826.64  | C14 H7 F3 N3 O5 | (M-H) <sup>-</sup> |
| 357.0427 | -1 | 6142.26   | C14 H7 F3 N3 O5 | (M-H) <sup>-</sup> |
| 358.0445 | -1 | 263.01    | C14 H7 F3 N3 O5 | (M-H) <sup>-</sup> |

**Predicted Isotope Match Table**

| Isotope | m/z      | Calc m/z | Diff (ppm) | Abund % | Calc Abund % | Abund Sum % | Calc Abund Sum % |
|---------|----------|----------|------------|---------|--------------|-------------|------------------|
| 1       | 354.0351 | 354.0343 | -2.05      | 100     | 100          | 84.94       | 83.99            |
| 2       | 355.0386 | 355.0373 | -3.81      | 15.73   | 16.51        | 13.36       | 13.87            |
| 3       | 356.0403 | 356.0395 | -2.26      | 1.81    | 2.31         | 1.54        | 1.94             |
| 4       | 357.0427 | 357.042  | -2         | 0.19    | 0.23         | 0.16        | 0.19             |
| 5       | 358.0445 | 358.0443 | -0.56      | 0.01    | 0.02         | 0.01        | 0.02             |

--- End Of Report ---

<sup>1</sup>H NMR (400 MHz, CDCl<sub>3</sub>) of compound **10e**:

May09-2012-pumima  
3-F-DNB

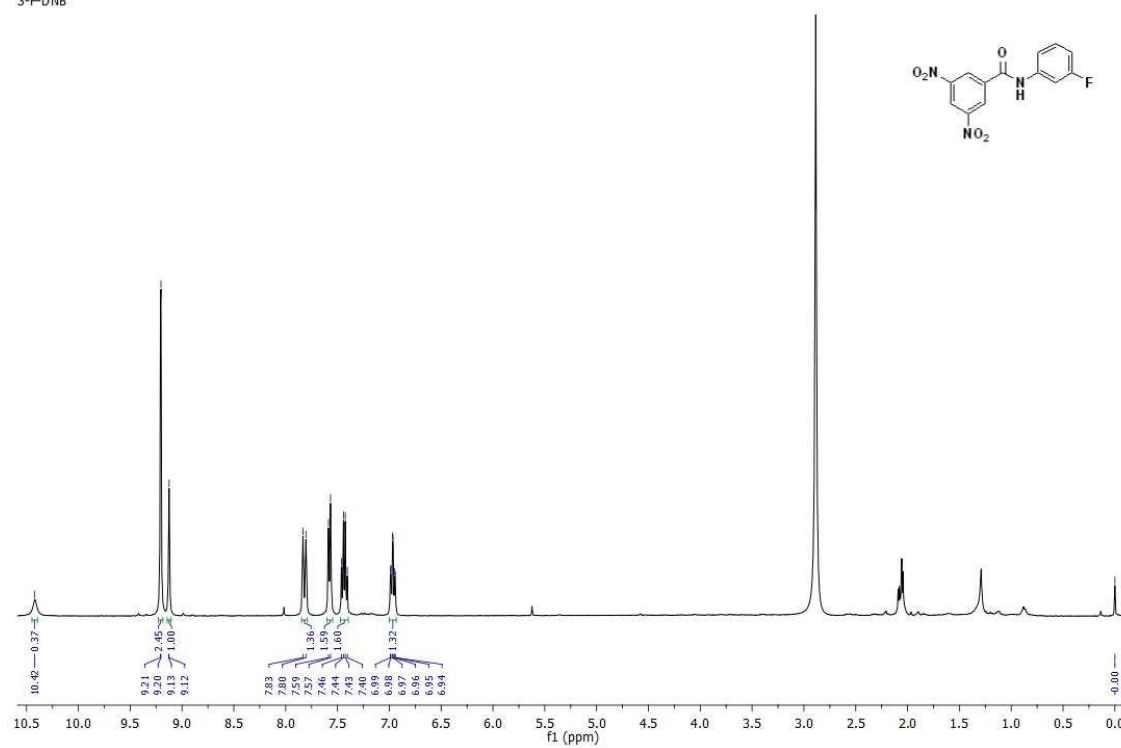

HRMS (ESI-TOF) of compound 10e:

Qualitative Compound Report

Data File: 61.d  
 Sample Type: Sample  
 Instrument Name: Instrument 1  
 Acq Method: vishal\_neg12-01-13.m  
 IRM Calibration Status: Success  
 Comment:

Sample Name: 60  
 Position: Vial 24  
 User Name:  
 Acquired Time: 04-03-2013 PM 3:54:47  
 DA Method: SamplePurity-Default.m

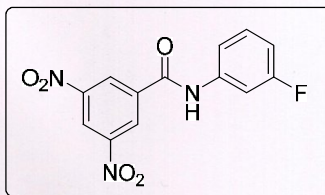

Sample Group: Info.  
 Acquisition SW: 6200 series TOF/6500 series  
 Version: Q-TOF B.05.01 (B5125)

Compound Table

| Compound Label        | RT    | Mass     | Formula        | MFG Formula    | MFG Diff (ppm) | DB Formula     |
|-----------------------|-------|----------|----------------|----------------|----------------|----------------|
| Cpd 5: C13 H8 F N3 O5 | 0.194 | 305.0453 | C13 H8 F N3 O5 | C13 H8 F N3 O5 | -1.56          | C13 H8 F N3 O5 |

| Compound Label        | m/z     | RT    | Algorithm                 | Mass     |
|-----------------------|---------|-------|---------------------------|----------|
| Cpd 5: C13 H8 F N3 O5 | 304.038 | 0.194 | Find by Molecular Feature | 305.0453 |

MFE MS Spectrum

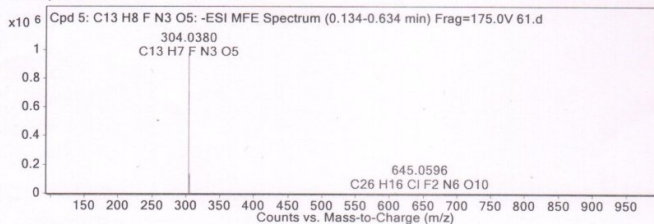

MS Spectrum Peak List

| m/z      | z  | Abund     | Formula              | Ion      |
|----------|----|-----------|----------------------|----------|
| 304.038  | -1 | 975104.75 | C13 H7 F N3 O5       | (M-H)-   |
| 305.0411 | -1 | 140109.38 | C13 H7 F N3 O5       | (M-H)-   |
| 306.043  | -1 | 18894.85  | C13 H7 F N3 O5       | (M-H)-   |
| 307.0466 | -1 | 2044.24   | C13 H7 F N3 O5       | (M-H)-   |
| 340.0146 | -1 | 6072.72   | C13 H8 Cl F N3 O5    | (M+Cl)-  |
| 342.012  | -1 | 2337.86   | C13 H8 Cl F N3 O5    | (M+Cl)-  |
| 609.0827 | -1 | 4074.4    | C26 H15 F2 N6 O10    | (2M-H)-  |
| 645.0596 | -1 | 5595.32   | C26 H16 Cl F2 N6 O10 | (2M+Cl)- |
| 646.0627 | -1 | 1941.91   | C26 H16 Cl F2 N6 O10 | (2M+Cl)- |
| 647.0562 | -1 | 1559.75   | C26 H16 Cl F2 N6 O10 | (2M+Cl)- |

Predicted Isotope Match Table

| Isotope | m/z      | Calc m/z | Diff (ppm) | Abund % | Calc Abund % | Abund Sum % | Calc Abund Sum % |
|---------|----------|----------|------------|---------|--------------|-------------|------------------|
| 1       | 304.038  | 304.0375 | -1.5       | 100     | 100          | 85.83       | 84.91            |
| 2       | 305.0411 | 305.0405 | -1.99      | 14.37   | 15.43        | 12.33       | 13.1             |
| 3       | 306.043  | 306.0426 | -1.41      | 1.94    | 2.14         | 1.66        | 1.82             |
| 4       | 307.0466 | 307.0451 | -4.93      | 0.21    | 0.21         | 0.18        | 0.18             |

--- End Of Report ---



<sup>1</sup>H NMR (400 MHz, CDCl<sub>3</sub>) of compound **11a**:

n-me-r-dnb  
R-N-Me-DNB

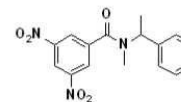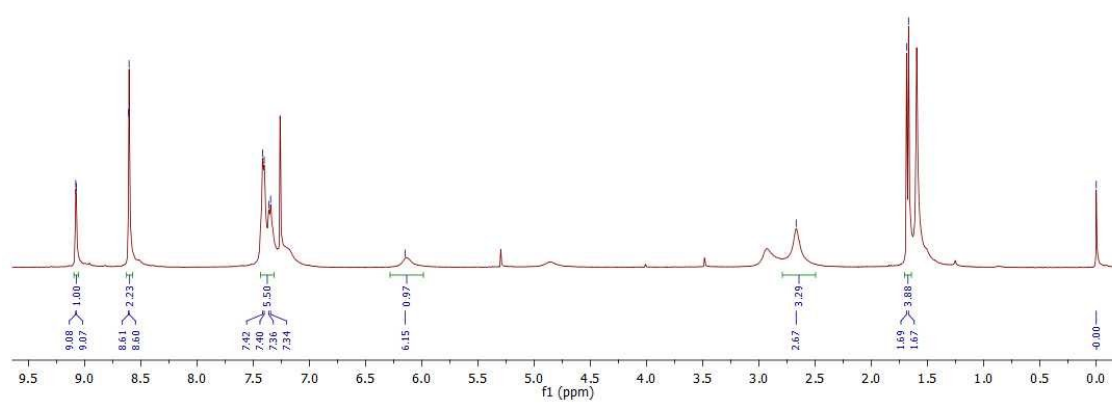

HRMS (ESI-TOF) of compound **10d**:

**Qualitative Compound Report**

**Data File** 113.d **Sample Name** 113  
**Sample Type** Sample **Position** Vial 28  
**Instrument Name** Instrument 1 **User Name**  
**Acq Method** vishal\_12-01-13.m **Acquired Time** 01-04-2013 PM 5:27:48  
**IRM Calibration Status** Success **DA Method** SamplePurity-Default.m  
**Comment**

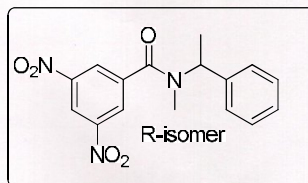

**Sample Group** Info.  
**Acquisition SW** 6200 series TOF/6500 series  
**Version** Q-TOF B.05.01 (B5125)

**Compound Table**

| Compound Label        | RT    | Mass     | Formula       | MFG Formula   | MFG Diff (ppm) | DB Formula    |
|-----------------------|-------|----------|---------------|---------------|----------------|---------------|
| Cpd 26: C16 H15 N3 O5 | 0.187 | 329.1009 | C16 H15 N3 O5 | C16 H15 N3 O5 | 0.7            | C16 H15 N3 O5 |

| Compound Label        | m/z      | RT    | Algorithm                 | Mass     |
|-----------------------|----------|-------|---------------------------|----------|
| Cpd 26: C16 H15 N3 O5 | 330.1082 | 0.187 | Find by Molecular Feature | 329.1009 |

**MFE MS Spectrum**

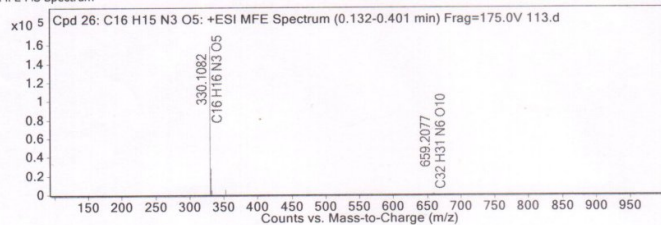

**MS Spectrum Peak List**

| m/z      | z | Abund     | Formula           | Ion      |
|----------|---|-----------|-------------------|----------|
| 330.1082 | 1 | 158467.95 | C16 H16 N3 O5     | (M+H)+   |
| 331.1113 | 1 | 27377.96  | C16 H16 N3 O5     | (M+H)+   |
| 332.1142 | 1 | 4201.93   | C16 H16 N3 O5     | (M+H)+   |
| 333.1168 | 1 | 431.09    | C16 H16 N3 O5     | (M+H)+   |
| 352.09   | 1 | 5081.64   | C16 H15 N3 Na O5  | (M+Na)+  |
| 353.094  | 1 | 734       | C16 H15 N3 Na O5  | (M+Na)+  |
| 354.096  | 1 | 369.34    | C16 H15 N3 Na O5  | (M+Na)+  |
| 659.2077 | 1 | 1299.82   | C32 H31 N6 O10    | (2M+H)+  |
| 660.2087 | 1 | 550.95    | C32 H31 N6 O10    | (2M+H)+  |
| 681.1884 | 1 | 399.1     | C32 H30 N6 Na O10 | (2M+Na)+ |

**Predicted Isotope Match Table**

| Isotope | m/z      | Calc m/z | Diff (ppm) | Abund % | Calc Abund % | Abund Sum % | Calc Abund Sum % |
|---------|----------|----------|------------|---------|--------------|-------------|------------------|
| 1       | 330.1082 | 330.1084 | 0.77       | 100     | 100          | 83.19       | 82.13            |
| 2       | 331.1113 | 331.1115 | 0.6        | 17.28   | 18.78        | 14.37       | 15.42            |
| 3       | 332.1142 | 332.1138 | -1.17      | 2.65    | 2.69         | 2.21        | 2.21             |
| 4       | 333.1168 | 333.1163 | -1.52      | 0.27    | 0.29         | 0.23        | 0.23             |

--- End Of Report ---

Chiral HPLC analysis of **4b**, **7a** and **7b**:

HPLC graph of compound **4b** (racemic):

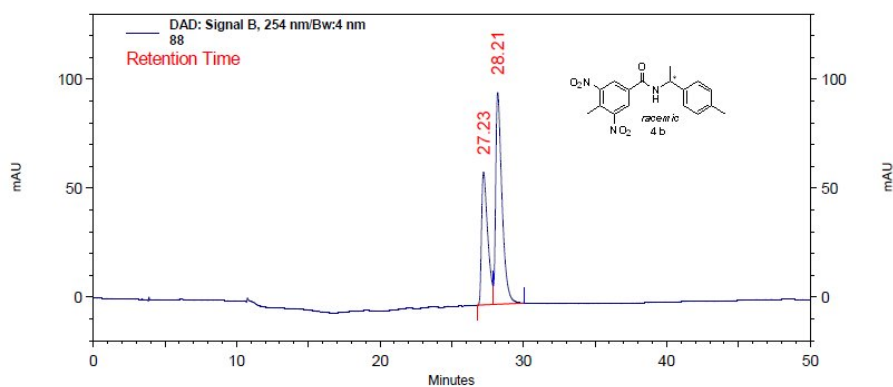

DAD: Signal B, 254  
nm/Bw:4 nm Results

| Retention Time | Area    | Height | Area %   |
|----------------|---------|--------|----------|
| 27.23          | 3834175 | 127791 | 37.90    |
| 28.21          | 6282791 | 203805 | 62.10    |
| Totals         |         |        | 10116966 |
|                |         |        | 331596   |
|                |         |        | 100.00   |

HPLC graph of compound **7a** (**R**-enantiomer):

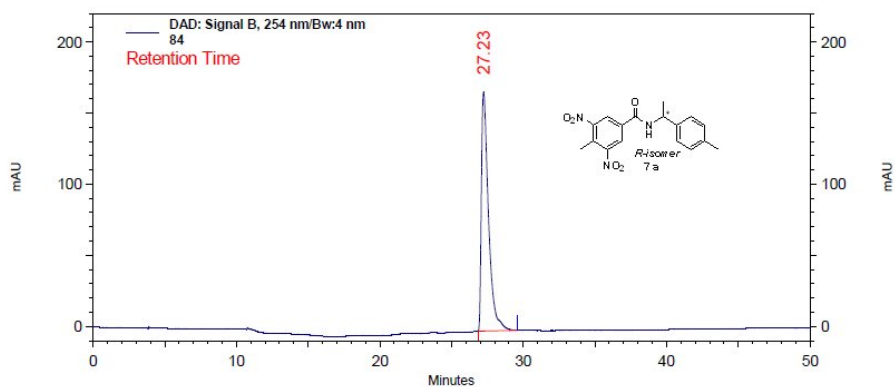

DAD: Signal B, 254  
nm/Bw:4 nm Results

| Retention Time | Area     | Height | Area %   |
|----------------|----------|--------|----------|
| 27.23          | 12195694 | 352105 | 100.00   |
| Totals         |          |        | 12195694 |
|                |          |        | 352105   |
|                |          |        | 100.00   |

HPLC graph of compound **7b** (*S*-enantiomer):

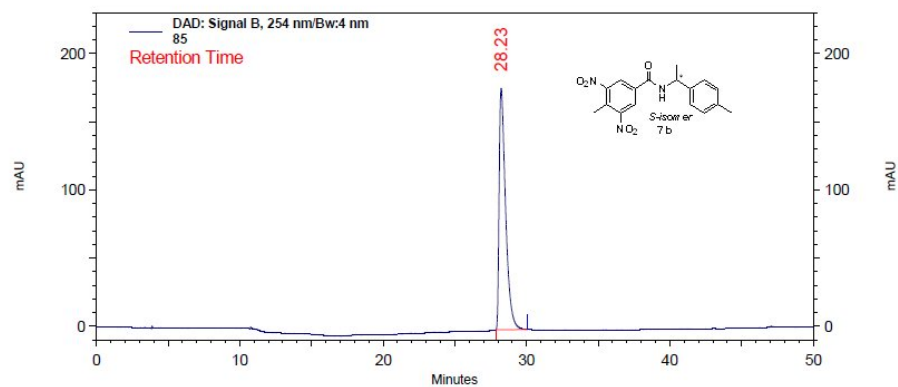

DAD: Signal B, 254  
nm/Bw:4 nm Results

| Retention Time | Area     | Height | Area % |
|----------------|----------|--------|--------|
| 28.23          | 11627387 | 371417 | 100.00 |
| Totals         | 11627387 | 371417 | 100.00 |
